# Supplementary material
Source: PubMed Central journal article supplement (PMC7803147)
Supplement: mmc2.pdf [file mmc2.pdf]

| Human IL6 Signaling Pathway (PAHS-160Y) |                                                                                     | Human TNF- $\alpha$ Signaling Pathway (PAHS-063Z) |                                                                                                  | Housekeeping gene |                                                                     |
|-----------------------------------------|-------------------------------------------------------------------------------------|---------------------------------------------------|--------------------------------------------------------------------------------------------------|-------------------|---------------------------------------------------------------------|
| Symbol                                  | Description                                                                         | Symbol                                            | Description                                                                                      | Symbol            | Description                                                         |
| <i>MAP2K1</i>                           | Mitogen-activated protein kinase kinase 1                                           | <i>AGFG1</i>                                      | ArfGAP with FG repeats 1                                                                         | <i>ACADVL</i>     | Acyl-CoA dehydrogenase, very long chain                             |
| <i>CCL4</i>                             | Chemokine (C-C motif) ligand 4                                                      | <i>ARHGDB1B</i>                                   | Rho GDP dissociation inhibitor (GDI) beta                                                        | <i>ATP6V1F</i>    | ATPase, H <sup>+</sup> transporting, lysosomal 14 kDa, V1 subunit F |
| <i>MAPK8</i>                            | Mitogen-activated protein kinase 8                                                  | <i>BAG4</i>                                       | BCL2-associated athanogene 4                                                                     | <i>BCAT2</i>      | Branched chain amino acid transaminase 2, mitochondrial             |
| <i>CASP4</i>                            | Caspase 4, apoptosis-related cysteine peptidase                                     | <i>CAD</i>                                        | Carbamoyl-phosphate synthetase 2, aspartate transcarbamylase, and dihydroorotase                 | <i>ACSL3</i>      | Acyl-CoA synthetase long-chain family member 3                      |
| <i>SRC</i>                              | V-src sarcoma (Schmidt-Ruppin A-2) viral oncogene homolog (avian)                   | <i>CASP2</i>                                      | Caspase 2, apoptosis-related cysteine peptidase                                                  | <i>LDLR</i>       | Low density lipoprotein receptor                                    |
| <i>IL1A</i>                             | Interleukin 1, alpha                                                                | <i>CASP3</i>                                      | Caspase 3, apoptosis-related cysteine peptidase                                                  |                   |                                                                     |
| <i>IL8</i>                              | Interleukin 8                                                                       | <i>CASP8</i>                                      | Caspase 8, apoptosis-related cysteine peptidase                                                  |                   |                                                                     |
| <i>CEBP<math>\delta</math></i>          | CCAAT/enhancer binding protein (C/EBP), delta                                       | <i>CD40</i>                                       | CD40 molecule, TNF receptor superfamily member 5                                                 |                   |                                                                     |
| <i>TNFSF10</i>                          | Tumor necrosis factor (ligand) superfamily, member 10                               | <i>CD70</i>                                       | CD70 molecule                                                                                    |                   |                                                                     |
| <i>GLRX</i>                             | Glutaredoxin (thioltransferase)                                                     | <i>CHUK</i>                                       | Conserved helix-loop-helix ubiquitous kinase                                                     |                   |                                                                     |
| <i>MAPK3</i>                            | Mitogen-activated protein kinase 3                                                  | <i>CRADD</i>                                      | CASP2 and RIPK1 domain containing adaptor with death domain                                      |                   |                                                                     |
| <i>PHF21A</i>                           | PHD finger protein 21A                                                              | <i>DDIT3</i>                                      | DNA fragmentation factor, 45kDa, alpha polypeptide                                               |                   |                                                                     |
| <i>JUNB</i>                             | Jun B proto-oncogene                                                                | <i>DUSP1</i>                                      | Dual specificity phosphatase 1                                                                   |                   |                                                                     |
| <i>IL23A</i>                            | Interleukin 23, alpha subunit p19                                                   | <i>FADD</i>                                       | Fas (TNFRSF6)-associated via death domain                                                        |                   |                                                                     |
| <i>BAX</i>                              | BCL2-associated X protein                                                           | <i>FAS</i>                                        | Fas (TNF receptor superfamily, member 6)                                                         |                   |                                                                     |
| <i>SOCS1</i>                            | Suppressor of cytokine signaling 1                                                  | <i>IKBAP</i>                                      | Inhibitor of kappa light polypeptide gene enhancer in B-cells, kinase complex-associated protein |                   |                                                                     |
| <i>IL1B</i>                             | Interleukin 1, beta                                                                 | <i>IKBKAP</i>                                     | Inhibitor of kappa light polypeptide gene enhancer in B-cells, kinase beta                       |                   |                                                                     |
| <i>MAPK1</i>                            | Mitogen-activated protein kinase 1                                                  | <i>IKBKG</i>                                      | Inhibitor of kappa light polypeptide gene enhancer in B-cells, kinase gamma                      |                   |                                                                     |
| <i>IL6ST</i>                            | Interleukin 6 signal transducer (gp130, oncostatin M receptor)                      | <i>JUN</i>                                        | Jun proto-oncogene                                                                               |                   |                                                                     |
| <i>TNFRSF1B</i>                         | Tumor necrosis factor receptor superfamily, member 1B                               | <i>LMNA</i>                                       | Lamin A/C                                                                                        |                   |                                                                     |
| <i>IL18</i>                             | Interleukin 18 (interferon-gamma-inducing factor)                                   | <i>LMNB1</i>                                      | Lamin B1                                                                                         |                   |                                                                     |
| <i>JAK2</i>                             | Janus kinase 2                                                                      | <i>LMNB2</i>                                      | Lamin B2                                                                                         |                   |                                                                     |
| <i>AKT1</i>                             | V-akt murine thymoma viral oncogene homolog 1                                       | <i>LTB</i>                                        | Lymphotoxin beta (TNF superfamily, member 3)                                                     |                   |                                                                     |
| <i>FAS</i>                              | Fas (TNF receptor superfamily, member 6)                                            | <i>LTBR</i>                                       | Lymphotoxin beta receptor (TNFR superfamily, member 3)                                           |                   |                                                                     |
| <i>CXCL10</i>                           | Chemokine (C-X-C motif) ligand 10                                                   | <i>MADD</i>                                       | MAP-kinase activating death domain                                                               |                   |                                                                     |
| <i>STAT3</i>                            | Signal transducer and activator of transcription 3 (acute-phase response factor)    | <i>MAP2K4</i>                                     | Mitogen-activated protein kinase kinase 4                                                        |                   |                                                                     |
| <i>PROS1</i>                            | Protein S (alpha)                                                                   | <i>MAP3K1</i>                                     | Mitogen-activated protein kinase kinase kinase 1                                                 |                   |                                                                     |
| <i>IL15</i>                             | Interleukin 15                                                                      | <i>MAP3K7</i>                                     | Mitogen-activated protein kinase kinase kinase 7                                                 |                   |                                                                     |
| <i>CCL2</i>                             | Chemokine (C-C motif) ligand 2                                                      | <i>MAPK8</i>                                      | Mitogen-activated protein kinase 8                                                               |                   |                                                                     |
| <i>IL1R1</i>                            | Interleukin 1 receptor, type 1                                                      | <i>NFKB1</i>                                      | Nuclear factor of kappa light polypeptide gene enhancer in B-cells 1                             |                   |                                                                     |
| <i>CD40</i>                             | CD40 molecule, TNF receptor superfamily member 5                                    | <i>NFKBIA</i>                                     | Nuclear factor of kappa light polypeptide gene enhancer in B-cells inhibitor, alpha              |                   |                                                                     |
| <i>IL18R1</i>                           | Interleukin 18 receptor 1                                                           | <i>NGFR</i>                                       | Nerve growth factor receptor                                                                     |                   |                                                                     |
| <i>LIF</i>                              | Leukemia inhibitory factor (cholinergic differentiation factor)                     | <i>PAK1</i>                                       | P21 protein (Cdc42/Rac)-activated kinase 1                                                       |                   |                                                                     |
| <i>NRP1</i>                             | Neuropilin 1                                                                        | <i>PAK2</i>                                       | P21 protein (Cdc42/Rac)-activated kinase 2                                                       |                   |                                                                     |
| <i>MET</i>                              | Met proto-oncogene (hepatocyte growth factor receptor)                              | <i>PARP1</i>                                      | Poly (ADP-ribose) polymerase 1                                                                   |                   |                                                                     |
| <i>IFITM2</i>                           | Interferon induced transmembrane protein 2 (1-8D)                                   | <i>PGLYRP1</i>                                    | Peptidoglycan recognition protein 1                                                              |                   |                                                                     |
| <i>MYC</i>                              | V-myc myelocytomatosis viral oncogene homolog (avian)                               | <i>PRKDC</i>                                      | Protein kinase, DNA-activated, catalytic polypeptide                                             |                   |                                                                     |
| <i>OSM</i>                              | Oncostatin M                                                                        | <i>PSMG2</i>                                      | Proteasome (prosome, macropain) assembly chaperone 2                                             |                   |                                                                     |
| <i>CSF3</i>                             | Colony stimulating factor 3 (granulocyte)                                           | <i>RBI</i>                                        | Retinoblastoma 1                                                                                 |                   |                                                                     |
| <i>LIFR</i>                             | Leukemia inhibitory factor receptor alpha                                           | <i>RELT</i>                                       | RELT tumor necrosis factor receptor                                                              |                   |                                                                     |
| <i>IL11</i>                             | Interleukin 11                                                                      | <i>SPTAN1</i>                                     | Spectrin, alpha, non-erythrocytic 1 (alpha-fodrin)                                               |                   |                                                                     |
| <i>TNFRSF10B</i>                        | Tumor necrosis factor receptor superfamily, member 10b                              | <i>TNF</i>                                        | Tumor necrosis factor                                                                            |                   |                                                                     |
| <i>EGFR</i>                             | Epidermal growth factor receptor                                                    | <i>TNFAIP3</i>                                    | Tumor necrosis factor, alpha-induced protein 3                                                   |                   |                                                                     |
| <i>TNFRSF1A</i>                         | Tumor necrosis factor receptor superfamily, member 1A                               | <i>TNFRSF10A</i>                                  | Tumor necrosis factor receptor superfamily, member 10a                                           |                   |                                                                     |
| <i>BCL3</i>                             | B-cell CLL/lymphoma 3                                                               | <i>TNFRSF10B</i>                                  | Tumor necrosis factor receptor superfamily, member 10b                                           |                   |                                                                     |
| <i>NFKBIA</i>                           | Nuclear factor of kappa light polypeptide gene enhancer in B-cells inhibitor, alpha | <i>TNFRSF10D</i>                                  | Tumor necrosis factor receptor superfamily, member 10d, decoy with truncated death domain        |                   |                                                                     |
| <i>MAPK14</i>                           | Mitogen-activated protein kinase 14                                                 | <i>TNFRSF11A</i>                                  | Tumor necrosis factor receptor superfamily, member 11a, NFKB activator                           |                   |                                                                     |
| <i>NFKB1</i>                            | Nuclear factor of kappa light polypeptide gene enhancer in B-cells 1                | <i>TNFRSF11B</i>                                  | Tumor necrosis factor receptor superfamily, member 11b                                           |                   |                                                                     |
| <i>SOCS3</i>                            | Suppressor of cytokine signaling 3                                                  | <i>TNFRSF12A</i>                                  | Tumor necrosis factor receptor superfamily, member 12A                                           |                   |                                                                     |
| <i>IL6</i>                              | Interleukin 6 (interferon, beta 2)                                                  | <i>TNFRSF13C</i>                                  | Tumor necrosis factor receptor superfamily, member 13C                                           |                   |                                                                     |
| <i>CCL3</i>                             | Chemokine (C-C motif) ligand 3                                                      | <i>TNFRSF14</i>                                   | Tumor necrosis factor receptor superfamily, member 14 (herpesvirus entry mediator)               |                   |                                                                     |
| <i>MTOR</i>                             | Mechanistic target of rapamycin (serine/threonine kinase)                           | <i>TNFRSF18</i>                                   | Tumor necrosis factor receptor superfamily, member 18                                            |                   |                                                                     |
| <i>CSF3R</i>                            | Colony stimulating factor 3 receptor (granulocyte)                                  | <i>TNFRSF19</i>                                   | Tumor necrosis factor receptor superfamily, member 19                                            |                   |                                                                     |
| <i>IL6R</i>                             | Interleukin 6 receptor                                                              | <i>TNFRSF1A</i>                                   | Tumor necrosis factor receptor superfamily, member 1A                                            |                   |                                                                     |
| <i>CCL5</i>                             | Chemokine (C-C motif) ligand 5                                                      | <i>TNFRSF1B</i>                                   | Tumor necrosis factor receptor superfamily, member 1B                                            |                   |                                                                     |
| <i>RELA</i>                             | V-rel reticulendotheliosis viral oncogene homolog A (avian)                         | <i>TNFRSF21</i>                                   | Tumor necrosis factor receptor superfamily, member 21                                            |                   |                                                                     |
| <i>CD4</i>                              | CD4 molecule                                                                        | <i>TNFRSF6B</i>                                   | Tumor necrosis factor receptor superfamily, member 6b, decoy                                     |                   |                                                                     |
| <i>TLR4</i>                             | Toll-like receptor 4                                                                | <i>TNFRSF9</i>                                    | Tumor necrosis factor receptor superfamily, member 9                                             |                   |                                                                     |
| <i>CSF2</i>                             | Colony stimulating factor 2 (granulocyte-macrophage)                                | <i>TNFSF10</i>                                    | Tumor necrosis factor (ligand) superfamily, member 10                                            |                   |                                                                     |
| <i>TGM2</i>                             | Transglutaminase 2 (C, polypeptide, protein-glutamine-gamma-glutamyltransferase)    | <i>TNFSF12</i>                                    | Tumor necrosis factor (ligand) superfamily, member 12                                            |                   |                                                                     |
| <i>JAK3</i>                             | Janus kinase 3                                                                      | <i>TNFSF13</i>                                    | Tumor necrosis factor (ligand) superfamily, member 13                                            |                   |                                                                     |
| <i>PIM1</i>                             | Pim-1 oncogene                                                                      | <i>TNFSF13B</i>                                   | Tumor necrosis factor (ligand) superfamily, member 13b                                           |                   |                                                                     |
| <i>TNF</i>                              | Tumor necrosis factor                                                               | <i>TNFSF14</i>                                    | Tumor necrosis factor (ligand) superfamily, member 14                                            |                   |                                                                     |
| <i>PNRL2</i>                            | Poliiovirus receptor-related 2 (herpesvirus entry mediator B)                       | <i>TNFSF15</i>                                    | Tumor necrosis factor (ligand) superfamily, member 15                                            |                   |                                                                     |
| <i>BCL2</i>                             | B-cell CLL/lymphoma 2                                                               | <i>TNFSF18</i>                                    | Tumor necrosis factor (ligand) superfamily, member 18                                            |                   |                                                                     |
| <i>TYK2</i>                             | Tyrosine kinase 2                                                                   | <i>TNFSF4</i>                                     | Tumor necrosis factor (ligand) superfamily, member 4                                             |                   |                                                                     |
| <i>CSF1</i>                             | Colony stimulating factor 1 (macrophage)                                            | <i>TNFSF9</i>                                     | Tumor necrosis factor (ligand) superfamily, member 9                                             |                   |                                                                     |
| <i>PLA3</i>                             | Protein inhibitor of activated STAT, 3                                              | <i>TRADD</i>                                      | TNFRSF1A-associated via death domain                                                             |                   |                                                                     |
| <i>TUBB2A</i>                           | Tubulin, beta 2A                                                                    | <i>TRAF1</i>                                      | TNF receptor-associated factor 1                                                                 |                   |                                                                     |
| <i>CDKN1A</i>                           | Cyclin-dependent kinase inhibitor 1A (p21, Cip1)                                    | <i>TRAF2</i>                                      | TNF receptor-associated factor 2                                                                 |                   |                                                                     |
|                                         |                                                                                     | <i>TRAF3</i>                                      | TNF receptor-associated factor 3                                                                 |                   |                                                                     |
