# Supplementary material
Source: PubMed Central journal article supplement (PMC7803147)
Supplement: mmc3.pdf [file mmc3.pdf]

Tab. S3 Differential expression data of 16 herbs suppressing the IL-6 signaling pathway.

| id       | Mufunone FC | Mufunone P | Yuhuan FC | Yuhuan P | Fubushuo FC | Fubushuo P | Xionghuang FC | Xionghuang P | Yinchiang FC | Yinchiang P | Guang FC | Guang P | Jinteng FC | Jinteng P | Zanousi FC | Zanousi P | Xuanhuang FC | Xuanhuang P | Danxin FC | Danxin P | Sankezhong FC | Sankezhong P | Duzhong FC | Duzhong P | Liangfang FC | Liangfang P | Linhuan FC | Linhuan P | Jinustian FC | Jinustian P | Guinuo FC | Guinuo P |      |
|----------|-------------|------------|-----------|----------|-------------|------------|---------------|--------------|--------------|-------------|----------|---------|------------|-----------|------------|-----------|--------------|-------------|-----------|----------|---------------|--------------|------------|-----------|--------------|-------------|------------|-----------|--------------|-------------|-----------|----------|------|
| MAPK1    | 0.17        | 0.05       | -1.1      | 0        | -1.1        | 0          | 0.08          | 0.52         | 0.23         | -0.05       | 0.23     | -0.05   | 0.23       | -0.05     | 0.23       | -0.05     | 0.23         | -0.05       | 0.23      | -0.05    | 0.23          | -0.05        | 0.23       | -0.05     | 0.23         | -0.05       | 0.23       | -0.05     | 0.23         | -0.05       | 0.23      | -0.05    | 0.23 |
| CCL4     | -2.91       | 0          | -2.72     | 0        | -2.88       | 0          | -3.94         | 0            | -0.56        | 0.06        | -2.51    | 0       | -2.75      | 0         | -1.15      | 0         | -3.57        | 0           | -0.36     | 0.32     | -2.01         | 0.05         | -2.23      | 0         | -1.59        | 0           | -1.29      | 0         | -1.92        | 0           | -1.66     | 0        |      |
| MAPK8    | -0.98       | 0.08       | -0.52     | 0.75     | -0.22       | 0.59       | 0.27          | 0.31         | -0.38        | 0.31        | -0.16    | 0.75    | -0.56      | 0.2       | 0.43       | 0.07      | -2.57        | 0           | -0.01     | 0.98     | 1.37          | 0            | -1.11      | 0.03      | 1.05         | 0           | -1.72      | 0.03      | 1.44         | 0.03        | -0.26     | 0.52     |      |
| CASP4    | 0.6         | 0.5        | 0         | 0.7      | 0           | 2.13       | 0             | -0.26        | 0.28         | 0.42        | 0        | 0.91    | 0          | 1.12      | 0          | 0.88      | 0            | 0.75        | 0         | 1.46     | 0             | 1.95         | 0          | 1.58      | 0            | 0.68        | 0          | 0.92      | 0            | 1.8         | 0         |          |      |
| SRC      | -2.33       | 0.06       | -0.8      | 0.47     | 0.8         | 0.23       | 0.34          | 0.61         | 1.23         | 0.03        | 0.74     | 0.45    | -2.82      | 0.03      | 0.84       | 0.07      | 0.77         | 0.3         | -0.69     | 0.39     | -0.07         | 0.95         | 1.2        | 0.1       | 1.36         | 0.01        | 0.7        | 0.31      | 2.35         | 0.06        | 0.51      | 0.48     |      |
| IL1A     | -0.92       | 0          | -1.54     | 0.01     | -1.56       | 0          | -1.11         | 0.02         | -0.95        | 0.01        | -0.72    | 0.22    | -0.94      | 0.04      | -0.16      | 0.58      | -2.36        | 0           | 0.5       | 0.39     | 0.46          | 0.26         | 0.64       | 0.05      | 0.74         | 0.07        | 3.88       | 0         | -0.43        | 0.36        | 0         |          |      |
| IL6      | -0.97       | 0.24       | 0.1       | 0.92     | -0.6        | 0.46       | -1.41         | 0.08         | 0.04         | 0.97        | 0.5      | 0.62    | -0.12      | 0.85      | 0.05       | 0.88      | -0.51        | 0.58        | -1.83     | 0.02     | -0.65         | 0.48         | -1.82      | 0.01      | 0.09         | 0.92        | -0.18      | 0.85      | -1.15        | 0.17        | -0.79     | 0.14     |      |
| CHERP0   | NA          | NA         | NA        | NA       | NA          | NA         | NA            | NA           | NA           | NA          | NA       | NA      | NA         | NA        | NA         | NA        | NA           | NA          | NA        | NA       | NA            | NA           | NA         | NA        | NA           | NA          | NA         | NA        | NA           | NA          | NA        | NA       |      |
| INPSP10  | -0.64       | 0.68       | -0.9      | 0.57     | 0.87        | 0.46       | -0.98         | 0.55         | -1.21        | 0.41        | 0.12     | 0.94    | -1.08      | 0.45      | -1.1       | 0.49      | -0.68        | 0.66        | -1.36     | 0.25     | 0.66          | 0.68         | 0.15       | 0.93      | 0.86         | 0.08        | 0.06       | 0.87      | 0.61         | -0.39       | 0.87      |          |      |
| GLRX     | -3.26       | 0.01       | -0.96     | 0.39     | -0.01       | 0.99       | 1.64          | 0.01         | 0.44         | 0.64        | -1.78    | 0.16    | -1.45      | 0.16      | 1.69       | 0         | -0.79        | 0.47        | 0.74      | 0.13     | 2.06          | 0            | 0.67       | 0.27      | 1.94         | 0           | 1.06       | 0.09      | -2.8         | 0.02        | 1.22      | 0.01     |      |
| MAPK3    | -2.8        | 0.02       | -0.17     | 0.85     | -0.02       | 0.98       | 1.37          | 0.88         | -1.61        | 0.08        | -1.97    | 0.13    | -0.5       | 0.58      | -1.01      | 0.84      | 0.34         | 0.67        | 0.92      | 0.06     | -0.33         | 0.66         | 1.54       | 0.02      | 0.62         | 0.29        | -0.28      | 0.75      | -0.47        | 0.55        | -1.21     | 0.28     |      |
| PHF21A   | 0.44        | 0.18       | -0.43     | 0.18     | -0.45       | 0.02       | -0.04         | 0.89         | 0.22         | 0.37        | 0.18     | 0.49    | -1.43      | 0.2       | -0.27      | 0.14      | 0.06         | 0.85        | -0.38     | 0.12     | 1.08          | 0            | 0.51       | 0.14      | -0.15        | 0.51        | -0.34      | 0.18      | -0.3         | 0.34        | -0.36     | 0.53     |      |
| JUNB     | 0.19        | 0.38       | 0.89      | 0        | 0.45        | 0.02       | 0.6           | 0            | 0.28         | 0.23        | 1.41     | 0       | 1.84       | 0         | 0.22       | 0.13      | 1.12         | 0           | 0.31      | 0.08     | -0.48         | 0.17         | -0.24      | 0.3       | -0.16        | 0.39        | 0.75       | 0         | 1.08         | 0           | 0.91      | 0        |      |
| IL2VA    | 0.41        | 0.53       | -1.32     | 0.47     | -2.38       | 0.02       | 0.71          | 0.28         | -0.44        | 0.47        | 0.01     | 0.9     | -5.13      | 0.01      | 0.27       | 0.53      | -2.58        | 0.04        | -0.37     | 0.56     | 1.13          | 0.13         | 0.78       | 0.21      | -0.38        | 0.53        | 2.63       | 0.09      | 0.21         | 2.47        | 0         |          |      |
| IL2N     | 0.62        | 0.16       | -0.18     | 0.69     | 0.72        | 0.04       | 0.02          | 0.6          | 0.02         | 0.59        | 0.52     | -0.16   | 0.76       | 0.48      | 0.55       | 0.26      | 0.56         | 0.81        | 0.05      | -0.76    | 0.39          | 0.82         | 0.01       | 0.11      | 0.8          | -2.93       | 0.02       | 0.17      | 0.67         | 0           |           |          |      |
| SOC3S1   | 0.03        | 0.99       | 5.12      | 0        | 5.08        | 0          | 4.05          | 0            | 0.56         | 0.75        | 4.34     | 0       | 5.69       | 0         | 3.38       | 0         | 6.56         | 0           | 1.4       | 0        | 4.79          | 0            | 4.84       | 0         | 2.97         | 0.01        | 1.07       | 0.53      | 3.73         | 0.01        | 1.46      | 0.44     |      |
| IL1B     | 0.47        | 0.32       | 0.88      | 2.02     | 0.26        | 0.74       | 0.16          | 0.93         | 1.36         | 0.52        | 0.2      | 0.9     | -1.5       | 0.52      | 0.4        | 0.52      | 0.54         | 0.78        | 0.57      | 0.83     | 4.98          | 0            | 1.59       | 0.54      | 0.93         | 0.64        | 1.18       | 0.49      | 0.68         | 1.14        | 0.64      | 0.87     |      |
| MAPK1    | -0.32       | 0.39       | 0.76      | 0.35     | 0.77        | 1.48       | 0.2           | 0.57         | -0.38        | 0.79        | -0.67    | 0.6     | -0.24      | 0.76      | -1.4       | 0.76      | 1.4          | 0.47        | 0.05      | -0.03    | 0.98          | -1.31        | 0.35       | -0.36     | 0.75         | 1.99        | 0.03       | -1.18     | 0.57         | 1.43        | 0.11      | 0.11     |      |
| HEAT1    | -1          | 0.47       | 0.2       | 0.92     | -0.12       | 0.95       | -1.98         | 0.18         | 0.92         | 0.56        | 3.78     | 0       | 1.32       | 0.13      | -1.26      | 0.29      | 2.26         | 0.13        | 0.97      | 0.31     | 0.3           | 0.82         | -0.72      | 0.64      | -1.07        | 0.87        | 0.03       | 0.99      | -1.33        | 0.36        | 2.48      | 0.01     |      |
| INPSP10B | -1.38       | 0.1        | -0.5      | 0.67     | 0.55        | 0.84       | -0.98         | 0.35         | 0.19         | 0.86        | -0.52    | 0.71    | 1.84       | 0.03      | -0.18      | 0.8       | -1.73        | 0.33        | -2.59     | 0.05     | -0.08         | 0.85         | 0.63       | 0.64      | 0.23         | 0.84        | 0.08       | 0.94      | 1.89         | 0.17        | 0.4       | 0.37     |      |
| IL13     | -1.49       | 0.27       | -2.3      | 0.08     | -2.62       | 0.05       | 1.67          | 0.02         | -2.07        | 0.06        | -1.26    | 0.34    | -1.34      | 0.3       | -0.22      | 0.72      | 1.62         | 0.03        | 1.07      | 0.54     | -0.17         | 0.59         | -0.31      | 0.79      | 0.16         | 0.83        | 0.57       | -1.85     | 0.16         | 0.71        | 0.38      |          |      |
| JAK2     | -2.25       | 0          | -0.36     | 0.23     | -0.49       | 0.09       | 0.17          | 0.54         | -0.11        | 0.67        | -0.83    | 0.07    | -1.27      | 0         | 0.58       | 0.01      | -0.75        | 0.03        | -0.06     | 0.8      | -1            | 0.1          | 0.59       | 0.09      | 0.86         | 0           | -0.18      | 0.52      | -0.36        | 0.3         | 0.38      | 0.23     |      |
| ACT1     | 1.68        | 0          | -0.77     | 0.35     | 0.16        | 0.78       | -0.56         | 0.5          | 0.77         | 0.21        | 0.81     | 0.25    | 0.89       | 0.05      | -0.21      | 0.68      | 1.14         | 0.04        | -0.12     | 0.84     | -0.82         | 0.5          | 1.78       | 0.16      | 0.72         | 0.13        | 0.03       | 0.06      | -2.16        | 0.07        | -0.72     | 0.44     |      |
| FAS      | 2.42        | 0.49       | NA        | NA       | NA          | NA         | NA            | NA           | NA           | NA          | NA       | NA      | 2.23       | 0.54      | -1.15      | 0.73      | NA           | NA          | 5.48      | 0        | 3.71          | 0.33         | 1.94       | 0.61      | NA           | NA          | NA         | NA        | 2.67         | 0.46        | 1.48      | 0.69     |      |
| CXCL10   | 3.15        | 0.45       | -0.39     | 0.9      | 2.91        | 0.29       | 0.78          | 0.82         | -0.43        | 0.89        | 0.63     | 0.84    | 1.14       | 0.66      | -0.67      | 0.83      | -0.19        | 0.95        | 1.93      | 0.64     | 4.45          | 0.29         | 2.39       | 0.49      | -1.65        | 0.6         | -0.57      | 0.86      | 1.58         | 0.53        | 1.95      | 0.57     |      |
| STAT3    | -0.16       | 0.74       | 0.33      | 0.44     | -1.13       | 0.04       | 0.65          | 0.15         | -0.16        | 0.37        | 0.49     | 0.56    | 0.96       | 0         | 0.66       | 0         | 1.36         | 0.4         | 0.38      | 0.27     | -3.03         | 0.01         | 0.32       | 0.53      | 0.31         | 0.24        | 0.35       | 0.38      | -1.08        | 0.11        | 0.62      | 0.1      |      |
| PRD3     | -1.34       | 0.35       | 0.55      | 0.6      | 0.01        | 0.99       | -1.54         | 0.28         | -1.18        | 0.27        | -0.88    | 0.52    | -1.36      | 0.35      | 1.11       | -1.69     | 0.21         | -2.54       | 0.08      | -0.03    | 0.98          | -0.91        | 0.52       | -1.32     | 0.27         | -2.06       | 0.12       | 0.03      | 0.97         | -1.37       | 0.33      |          |      |
| IL15     | 0.76        | 0.68       | 0.49      | 0.83     | 0.14        | 0.95       | 0.95          | 0.56         | 0.52         | 0.88        | 1.54     | 0.51    | 0.12       | 0.94      | 1.44       | 0.21      | 0.72         | 0.74        | -0.44     | 0.51     | 2.08          | 0.25         | 4.82       | 0         | 2.51         | 0.07        | 2.57       | 0.09      | 0.88         | 0.74        | 0.55      | 0.85     |      |
| CCL2     | 0.74        | 0.01       | 0.21      | 0.35     | 0.66        | 0          | -1.19         | 0            | -1.03        | 0           | -0.31    | 0.28    | -0.06      | 0.82      | -0.59      | 0         | 0.56         | 0.01        | 1.41      | 0        | -4.25         | 0            | -4.2       | 0         | -1.94        | 0           | 0.88       | 0.01      | -0.97        | 0           | 0         |          |      |
| IL1R1    | -1.12       | 0.45       | 0.61      | 0.7      | 2.8         | 0.02       | -1.1          | 0.48         | -0.65        | 0.67        | 3.7      | 0       | -0.11      | 0.41      | -0.67      | 0.48      | -0.14        | 0.93        | -2.32     | 0.13     | 1.16          | 0.43         | -0.34      | 0.81      | -0.64        | 0.69        | 0.42       | 0.79      | -0.65        | 0.63        | -1.76     | 0.22     |      |
| IL10     | -1.72       | 0          | -0.25     | 0.21     | -0.57       | 0          | -0.34         | 0.1          | -0.14        | -0.04       | -0.4     | 0       | -0.68      | 0         | -0.76      | 0         | -1.92        | 0           | -0.58     | 0        | 0.05          | 0.85         | -0.13      | 0.51      | -0.79        | 0           | 0.26       | -0.59     | 0            | -0.06       | 0.73      |          |      |
| IL18R1   | -1.63       | 0.26       | 0.89      | 0.49     | 0.8         | 0.13       | 0.39          | 2.94         | 0.03         | -0.61       | 0.56     | 0.08    | 0.49       | 0.11      | 0.87       | -1.8      | 0.05         | -0.74       | 0.05      | -0.23    | 0.87          | -0.8         | 0.55       | 0.99      | -0.33        | 1.86        | 0.05       | -1.05     | 0.43         | -1.26       | 0.55      |          |      |
| IL1F     | -3.99       | 0          | -1.8      | 0.02     | -4.01       | 0          | -3.24         | 0.01         | 0            | 1           | -2.64    | 0.03    | -1.3       | 0.14      | -1.06      | 0.02      | -2.07        | 0.02        | -2.77     | 0        | 1.11          | 0.04         | -3.14      | 0.01      | -0.8         | 0.07        | -3.83      | 0         | -3.24        | 0.01        | 0         | 1        |      |
| NF1      | NA          | NA         | 2.17      | 0.59     | 1.83        | 0.63       | 2.39          | 0.5          | 2.17         | 0.59        | 1.83     | 0.63    | 2.39       | 0.5       | 2.17       | 0.59      | 1.83         | 0.63        | 2.39      | 0.5      | 2.17          | 0.59         | 1.83       | 0.63      | 2.39         | 0.5         | 2.17       | 0.59      | 1.83         | 0.63        | 2.39      | 0.5      |      |
| MET      | 1.45        | 0.4        | -0.01     | 1        | 2.53        | 0.1        | 0.86          | 0.64         | 0.71         | 0.68        | 2.96     | 0.05    | 1.58       | 0.08      | -0.22      | 0.86      | 1.49         | 0.04        | 1.82      | 0.26     | 1.75          | 0.36         | -0.39      | 0.82      | 2.1          | 0.12        | -0.19      | 0.92      | 3.73         | 0           | -0.87     | 0.62     |      |
| ITIMP2   | 1.46        | 0.25       | 2         | 0.06     | 1.03        | 0.4        | -2.76         | 0.1          | -0.09        | 0.94        | 0.89     | 0.55    | -1.01      | 0.5       | 1.94       | 0.05      | 1.88         | 0.09        | 0.8       | 0.5      | 0.89          | 0.53         | 4.3        | 0.2       | -2.37        | 0.12        | -0.29      | 0.84      | 2.63         | 0.01        | 3.38      | 0        |      |
| MYC      | -0.22       | 0.85       | 1.78      | 0.01     | 1.13        | 0.14       | 0.67          | 0.4          | -2.03        | 0.06        | 0.61     | 0.6     | 2.32       | 0         | -1.36      | 0.06      | 1.07         | 0.41        | -1.76     | 0        | 0.86          | 0.38         | 1.7        | 0.02      | 3.51         | 0.01        | 0.66       | 0.56      | 0            | 0.69        | 0.4       |          |      |
| GSM      | 2.97        | 0.48       | NA        | NA       | NA          | NA         | 2.39          | 0.5          | NA           | NA          | NA       | 2.58    | 0.52       | NA        | NA         | NA        | NA           | 1.75        | 0.67      | 4.27     | 0.31          | NA           | NA         | NA</      |              |             |            |           |              |             |           |          |      |
