# Supplementary material
Source: PubMed Central journal article supplement (PMC7803147)
Supplement: mmc6.pdf [file mmc6.pdf]

Tab. S5 Chemical information of active ingredients in herbs suppressing the IL-6 and TNF- $\alpha$  pathways.

| No.                                                                                            | Herb Chinese Name | Herb Pinyin Name | Herb                            | Molecule Name                      | OB (%) | DL      | CAS                             | Pubchem CID | Database |
|------------------------------------------------------------------------------------------------|-------------------|------------------|---------------------------------|------------------------------------|--------|---------|---------------------------------|-------------|----------|
| 1                                                                                              | 木芙蓉叶              | Mufurongye       | <i>Hibisci Mutabilis Folium</i> | nonacosane                         | 8.12   | 0.39    | 630-03-5                        | 12409       | CSDB     |
|                                                                                                |                   |                  |                                 | tetraacontanol                     | 10.07  | 0.44    | 28484-70-0                      | 185639      | CSDB     |
|                                                                                                |                   |                  |                                 | guercetol                          | 46.43  | 0.28    | 117-39-5                        | 5280343     | CSDB     |
|                                                                                                |                   |                  |                                 | kaempferol                         | 41.88  | 0.24    | 520-18-3                        | 5280863     | CSDB     |
|                                                                                                |                   |                  |                                 | cyanidin-3,5-diglucoside           | NA     | NA      | 2611-67-8                       | 164999      | CSDB     |
|                                                                                                |                   |                  |                                 | cyanidin-3-sambubioside            | NA     | NA      | 33012-73-6                      | 3084569     | CSDB     |
|                                                                                                |                   |                  |                                 | betulinic acid                     | 55.38  | 0.78    | 472-15-1                        | 64971       | CSDB     |
|                                                                                                |                   |                  |                                 | isoquercitrin                      | 1.86   | 0.77    | 482-35-9                        | 5280804     | CSDB     |
|                                                                                                |                   |                  |                                 | stigmasta-4-ene-3-one              | 36.08  | 0.76    | 1058-61-3                       | 5484202     | CSDB     |
|                                                                                                |                   |                  |                                 | $\beta$ -sitosterol                | 36.91  | 0.75    | 83-46-5                         | 222284      | CSDB     |
|                                                                                                |                   |                  |                                 | hyperoside                         | 6.94   | 0.77    | 482-36-0                        | 5281643     | CSDB     |
|                                                                                                |                   |                  |                                 | spiraeoside                        | 3.52   | 0.81    | 20229-56-5                      | 5320844     | CSDB     |
|                                                                                                |                   |                  |                                 | ethyl stearate                     | 17.7   | 0.19    | 111-61-5                        | 8122        | CSDB     |
|                                                                                                |                   |                  |                                 | quercimeritrin                     | 2.85   | 0.79    | 491-50-9                        | 5282160     | CSDB     |
|                                                                                                |                   |                  |                                 | cyanidin-3-rutinoside-5-glucoside  | NA     | NA      | NA                              | 44256733    | CSDB     |
|                                                                                                |                   |                  |                                 | anthocyanin                        | NA     | NA      | NA                              | 145858      | CSDB     |
|                                                                                                |                   |                  |                                 | stigmasta-3,7-dione                | NA     | NA      | NA                              | NA          | CSDB     |
|                                                                                                |                   |                  |                                 | quercetin 4-mono-D-glucoside       | NA     | NA      | NA                              | NA          | CSDB     |
|                                                                                                |                   |                  |                                 | cyanidin-3-rutinoside-5-glucoside  | NA     | NA      | NA                              | 5316222     | TCMID    |
|                                                                                                |                   |                  |                                 | cyanidin-3-sophoroside-5-glucoside | NA     | NA      | NA                              | 5316224     | TCMID    |
|                                                                                                |                   |                  |                                 | cyanin                             | NA     | NA      | NA                              | 44256718    | TCMID    |
|                                                                                                |                   |                  |                                 | l-beta-cyanolanine                 | NA     | NA      | NA                              | NA          | TCMID    |
|                                                                                                |                   |                  |                                 | quercetin-3-o-glycoside            | NA     | NA      | NA                              | NA          | TCMID    |
|                                                                                                |                   |                  |                                 | quercetin-4- $\beta$ -glucoside    | NA     | NA      | NA                              | 5320844     | TCMID    |
|                                                                                                |                   |                  |                                 | spiramine w                        | NA     | NA      | NA                              | 51028292    | TCMID    |
|                                                                                                |                   |                  |                                 | 2                                  | 野菊花    | Yejuhua | <i>Chrysanthemi Indici Flos</i> | acacetin    | 34.97    |
| Linarin                                                                                        | 39.84             | 0.71             | 480-36-4                        |                                    |        |         |                                 | 5317025     | TCMSP    |
| $\beta$ -sitosterol                                                                            | 36.91             | 0.75             | 83-46-5                         |                                    |        |         |                                 | 222284      | TCMSP    |
| sitosterol                                                                                     | 36.91             | 0.75             | 83-46-5                         |                                    |        |         |                                 | 12303645    | TCMSP    |
| luteolin                                                                                       | 36.16             | 0.25             | 491-70-3                        |                                    |        |         |                                 | 5280445     | TCMSP    |
| daucosterol qt                                                                                 | 36.91             | 0.75             | 474-58-8                        |                                    |        |         |                                 | NA          | TCMSP    |
| acacetin-7-O- $\beta$ -D-galactopyranoside                                                     | 50.19             | 0.77             | 6916-74-1                       |                                    |        |         |                                 | NA          | TCMSP    |
| Arteglasin A                                                                                   | 52.45             | 0.33             | 33204-39-6                      |                                    |        |         |                                 | NA          | TCMSP    |
| (2S,6S,7aR)-2-[(1E,3E,5E,7E,9E,11E,13E)-1,3,5,7,9,11-hexamethylhept-2-ene]-6,7-diol-8-one      | 59.52             | 0.55             | 62687-22-3                      |                                    |        |         |                                 | 20054869    | TCMSP    |
| Azulenol(4,5-b)furan-2(3H)-one, 4-(acetyl)-                                                    | 68.44             | 0.27             | 20482-33-1                      |                                    |        |         |                                 | 174867      | TCMSP    |
| (3aR,4S,6R,6aR,9aR,9bR)-4,6-dihydro-2H-pyrido[2,1-b][1,4]oxazine                               | 40.08             | 0.19             | 21982-83-2                      |                                    |        |         |                                 | 9992975     | TCMSP    |
| quercetin                                                                                      | 46.43             | 0.28             | 117-39-5                        |                                    |        |         |                                 | 5280343     | TCMSP    |
| luteolin                                                                                       | 36.16             | 0.25             | 491-70-3                        |                                    |        |         |                                 | 5280445     | CSDB     |
| n-octacosanol                                                                                  | 10.7              | 0.41             | 557-61-9                        |                                    |        |         |                                 | 68406       | CSDB     |
| chrysanthemim                                                                                  | NA                | NA               | 7084-24-4                       |                                    |        |         |                                 | 197081      | CSDB     |
| linoleic acid                                                                                  | 41.9              | 0.14             | 60-33-3                         |                                    |        |         |                                 | 5280450     | CSDB     |
| angeloylajadin                                                                                 | NA                | NA               | NA                              |                                    |        |         |                                 | NA          | CSDB     |
| angeloylcumambrin B                                                                            | NA                | NA               | 82462-99-5                      |                                    |        |         |                                 | NA          | CSDB     |
| lupeol                                                                                         | 12.12             | 0.78             | 545-47-1                        |                                    |        |         |                                 | 259846      | CSDB     |
| $\beta$ -sitosterol-3-O- $\beta$ -D-glucopyranoside                                            | 20.63             | 0.62             | 474-58-8                        |                                    |        |         |                                 | 5742590     | CSDB     |
| arteglasin A                                                                                   | NA                | NA               | 33204-39-6                      |                                    |        |         |                                 | 169494      | CSDB     |
| $\beta$ -sitosterol                                                                            | 36.91             | 0.75             | 83-46-5                         |                                    |        |         |                                 | 222284      | CSDB     |
| eleutheroside A                                                                                | 20.63             | 0.62             | 474-58-8                        |                                    |        |         |                                 | 5742590     | CSDB     |
| alexandrin                                                                                     | 20.63             | 0.62             | 474-58-8                        |                                    |        |         |                                 | 5742590     | CSDB     |
| acacini                                                                                        | 39.84             | 0.71             | 480-36-4                        |                                    |        |         |                                 | 5317025     | CSDB     |
| acacetin-7-rhamnoglucoside                                                                     | NA                | NA               | 6995-22-1                       |                                    |        |         |                                 | NA          | CSDB     |
| acacetin                                                                                       | 34.97             | 0.24             | 480-44-4                        |                                    |        |         |                                 | 5280442     | CSDB     |
| acacetin-7-O- $\beta$ -D-galactopyranoside                                                     | NA                | NA               | 35013-09-3                      |                                    |        |         |                                 | NA          | CSDB     |
| glyceryl-1-monobenhenate                                                                       | NA                | NA               | 6916-74-1                       |                                    |        |         |                                 | 5362585     | CSDB     |
| chrysanthenone                                                                                 | NA                | NA               | 473-06-3                        |                                    |        |         |                                 | 442463      | CSDB     |
| chrysanthemaxanthin                                                                            | NA                | NA               | 27780-11-6                      |                                    |        |         |                                 | 21160900    | CSDB     |
| handelin chrysanthelide                                                                        | NA                | NA               | 62687-22-3                      |                                    |        |         |                                 | 90474153    | CSDB     |
| indicumenone                                                                                   | 35.68             | 0.1              | 109063-92-5                     |                                    |        |         |                                 | 46173956    | CSDB     |
| chrysanthemol                                                                                  | NA                | NA               | 5617-92-5                       |                                    |        |         |                                 | 110685      | CSDB     |
| cumambrin A                                                                                    | 68.44             | 0.27             | 20482-33-1                      |                                    |        |         |                                 | 174867      | CSDB     |
| ursolic acid                                                                                   | 16.77             | 0.75             | 77-52-1                         |                                    |        |         |                                 | 64945       | CSDB     |
| quercetin glucoside                                                                            | 4.78              | 0.8              | 34199-21-8                      |                                    |        |         |                                 | 52946987    | CSDB     |
| cumambrin B                                                                                    | 40.08             | 0.19             | 21982-83-2                      |                                    |        |         |                                 | 9992975     | CSDB     |
| acacini                                                                                        | NA                | NA               | NA                              |                                    |        |         |                                 | NA          | CSDB     |
| uddleoglucoside                                                                                | NA                | NA               | NA                              |                                    |        |         |                                 | NA          | CSDB     |
| chrysanthetriol                                                                                | NA                | NA               | 143086-40-2                     |                                    |        |         |                                 | 132535      | CSDB     |
| spiroenol ether                                                                                | NA                | NA               | NA                              |                                    |        |         |                                 | NA          | CSDB     |
| (+)-syringaresinol O- $\beta$ -D-glucopyranoside                                               | NA                | NA               | NA                              |                                    |        |         |                                 | 442830      | TCMID    |
| (2r)-eriodictyol-7-o- $\beta$ -d-glucopyranoside                                               | NA                | NA               | NA                              |                                    |        |         |                                 | 124258      | TCMID    |
| (2s)-eriodictyol-7-o- $\beta$ -d-glucopyranoside                                               | NA                | NA               | NA                              |                                    |        |         |                                 | 10412099    | TCMID    |
| (2s,3s)-1-phenyl-2,3-butanediol3-o- $\beta$ -d-glucopyranoside                                 | NA                | NA               | NA                              |                                    |        |         |                                 | 10991070    | TCMID    |
| 1,3-caffeoylquinic acid                                                                        | NA                | NA               | NA                              |                                    |        |         |                                 | 1794427     | TCMID    |
| 3,4-caffeoylquinic acid                                                                        | NA                | NA               | NA                              |                                    |        |         |                                 | NA          | TCMID    |
| 3,5-caffeoylquinic acid                                                                        | NA                | NA               | NA                              |                                    |        |         |                                 | NA          | TCMID    |
| 3-o-caffeoylquinic acid                                                                        | NA                | NA               | NA                              |                                    |        |         |                                 | 1794427     | TCMID    |
| 4-o-caffeoylquinic acid                                                                        | NA                | NA               | NA                              |                                    |        |         |                                 | 9798666     | TCMID    |
| 4-O- $\beta$ -D-glucopyranosyloxybenzoic acid                                                  | NA                | NA               | NA                              |                                    |        |         |                                 | 180953      | TCMID    |
| 5,7,3- $\beta$ -D-glucopyranosyl-4- $\beta$ -D-glucopyranosyl-6-O-methyl-2,3-dihydroxychromone | NA                | NA               | NA                              |                                    |        |         |                                 | NA          | TCMID    |
| 5,7-dihydroxychromone                                                                          | NA                | NA               | NA                              |                                    |        |         |                                 | 5281343     | TCMID    |
| 5-hydroxychromone-7-O-glucoside                                                                | NA                | NA               | NA                              |                                    |        |         |                                 | NA          | TCMID    |
| 5-o-caffeoylquinic acid                                                                        | NA                | NA               | NA                              |                                    |        |         |                                 | 12310830    | TCMID    |
| 7-(2-hydroxy-2-propyl)-10-methyl-4-methyl-7-glucosylisokanin                                   | NA                | NA               | NA                              |                                    |        |         |                                 | NA          | TCMID    |
| 7-glucosylisokanin                                                                             | NA                | NA               | NA                              |                                    |        |         |                                 | NA          | TCMID    |
| acacetin                                                                                       | NA                | NA               | NA                              |                                    |        |         |                                 | 25202697    | TCMID    |
| acacetin-7-o- $\beta$ -d-galactopyranoside                                                     | NA                | NA               | NA                              |                                    |        |         |                                 | 5480899     | TCMID    |
| acacetin-7-O- $\beta$ -D-glucopyranoside                                                       | NA                | NA               | NA                              |                                    |        |         |                                 | 5321954     | TCMID    |
| acacetin7-O-(6- $\beta$ -D-glucopyranosyl)-O-a-L-rhamnosyl                                     | NA                | NA               | NA                              |                                    |        |         |                                 | NA          | TCMID    |
| acacini                                                                                        | 39.84             | 0.71             | 480-36-4                        |                                    |        |         |                                 | 5317025     | TCMID    |
| angeloylajadin                                                                                 | NA                | NA               | NA                              |                                    |        |         |                                 | NA          | TCMID    |
| apigenin                                                                                       | NA                | NA               | NA                              |                                    |        |         |                                 | 25200950    | TCMID    |
| apigenin-7-o-glucoside                                                                         | NA                | NA               | NA                              |                                    |        |         |                                 | 45933926    | TCMID    |
| Apigenin-7-O- $\beta$ -D-glucopyranoside                                                       | NA                | NA               | NA                              |                                    |        |         |                                 | 5280704     | TCMID    |
| artoglasin                                                                                     | NA                | NA               | NA                              |                                    |        |         |                                 | NA          | TCMID    |
| blumenol                                                                                       | NA                | NA               | NA                              |                                    |        |         |                                 | 5280462     | TCMID    |
| boscialin                                                                                      | NA                | NA               | NA                              |                                    |        |         |                                 | 10846879    | TCMID    |
| caffeic acid                                                                                   | NA                | NA               | NA                              |                                    |        |         |                                 | 54710367    | TCMID    |
| chlorogenic acid                                                                               | NA                | NA               | NA                              |                                    |        |         |                                 | 53399195    | TCMID    |
| chlorogenicacid                                                                                | NA                | NA               | NA                              |                                    |        |         |                                 | 1794427     | TCMID    |
| chrysanthemim                                                                                  | NA                | NA               | NA                              |                                    |        |         |                                 | 44256715    | TCMID    |
| chrysanthemol                                                                                  | NA                | NA               | NA                              |                                    |        |         |                                 | 11118126    | TCMID    |
| chrysanthenone                                                                                 | NA                | NA               | NA                              |                                    |        |         |                                 | 11789373    | TCMID    |
| chrysanthetriol                                                                                | NA                | NA               | NA                              |                                    |        |         |                                 | 46173955    | TCMID    |
| chrysarobin                                                                                    | NA                | NA               | NA                              |                                    |        |         |                                 | 221502      | TCMID    |
| chrysol                                                                                        | NA                | NA               | NA                              |                                    |        |         |                                 | 9171        | TCMID    |
| cinaroside                                                                                     | NA                | NA               | NA                              |                                    |        |         |                                 | 5280637     | TCMID    |
| cumambrin-A                                                                                    | 68.44             | 0.27             | 20482-33-1                      |                                    |        |         |                                 | 174867      | TCMID    |
| diosmetin 7-o- $\beta$ -d-glucopyranoside                                                      | NA                | NA               | NA                              |                                    |        |         |                                 | 11016019    | TCMID    |
| eriodictyol-7-O- $\beta$ -D-glucoside                                                          | NA                | NA               | NA                              |                                    |        |         |                                 | NA          | TCMID    |
| eupatilin                                                                                      | NA                | NA               | NA                              |                                    |        |         |                                 | 5273755     | TCMID    |
| handelin                                                                                       | NA                | NA               | NA                              |                                    |        |         |                                 | 3085251     | TCMID    |
| indicumenone                                                                                   | 35.68             | 0.1              | 109063-92-5                     |                                    |        |         |                                 | 46173956    | TCMID    |

|   |      |            |                   |                                       |        |      |             |          |       |
|---|------|------------|-------------------|---------------------------------------|--------|------|-------------|----------|-------|
|   |      |            |                   | indicumolide A                        | NA     | NA   | NA          | 44477822 | TCMID |
|   |      |            |                   | indicumolide B                        | NA     | NA   | NA          | 44477821 | TCMID |
|   |      |            |                   | indicumolide C                        | NA     | NA   | NA          | 44477823 | TCMID |
|   |      |            |                   | linarin                               | NA     | NA   | NA          | 11968446 | TCMID |
|   |      |            |                   | luteolin                              | NA     | NA   | NA          | 25201972 | TCMID |
|   |      |            |                   | luteolin-7-O-β-D-glucopyranoside      | NA     | NA   | NA          | 5291488  | TCMID |
|   |      |            |                   | luteolin-7-o-β-d-glucuronide          | NA     | NA   | NA          | NA       | TCMID |
|   |      |            |                   | p-hydroxybenzoic acid                 | NA     | NA   | NA          | 54675830 | TCMID |
|   |      |            |                   | penduletin                            | NA     | NA   | NA          | 5320462  | TCMID |
|   |      |            |                   | pseudotaraxasterol                    | NA     | NA   | NA          | 3034659  | TCMID |
|   |      |            |                   | quercetin-3,7-diglucoside             | NA     | NA   | NA          | 13345444 | TCMID |
|   |      |            |                   | sucrose                               | NA     | NA   | NA          | 53301851 | TCMID |
|   |      |            |                   | tricin                                | NA     | NA   | NA          | 46878516 | TCMID |
|   |      |            |                   | tunefulin                             | NA     | NA   | NA          | NA       | TCMID |
|   |      |            |                   | uracil                                | NA     | NA   | NA          | 49769955 | TCMID |
|   |      |            |                   | yejunualactone                        | NA     | NA   | NA          | NA       | TCMID |
|   |      |            |                   | β-daucosterol                         | 20.63  | 0.62 | 474-58-8    | 5742590  | TCMID |
|   |      |            |                   | β-sitosterol                          | 36.91  | 0.75 | 83-46-5     | 222284   | TCMID |
| 3 | 鹅不食草 | Ebushicao  | Centipediae Herba | Plenolin                              | 68.26  | 0.19 | 34257-95-9  | 442294   | TCMSP |
|   |      |            |                   | 2β-hydroxy-2,3-dihydrogen-6-O-angel   | 39.36  | 0.4  | NA          | NA       | TCMSP |
|   |      |            |                   | 1-[(Z)-2-(3,5-dimethoxyphenyl)vinyl]- | 41.69  | 0.21 | NA          | 11472105 | TCMSP |
|   |      |            |                   | [2-hydroxy-2-(2-hydroxy-4-methylphen  | 43.19  | 0.2  | NA          | 16196971 | TCMSP |
|   |      |            |                   | Arnicolide D                          | 85.85  | 0.33 | 34532-68-8  | NA       | TCMSP |
|   |      |            |                   | arnicolide C                          | 76.91  | 0.32 | 34532-67-7  | 14656910 | TCMSP |
|   |      |            |                   | florilenalin angelic acid             | 105.11 | 0.39 | NA          | NA       | TCMSP |
|   |      |            |                   | florilenalin isobutyrate              | 55.53  | 0.38 | NA          | NA       | TCMSP |
|   |      |            |                   | senecioplplenolin                     | 90.22  | 0.37 | NA          | NA       | TCMSP |
|   |      |            |                   | [(3S,4aR,6aR,6aR,6bR,8aR,12S,12aR,    | 33.84  | 0.3  | NA          | 14055767 | TCMSP |
|   |      |            |                   | (1R,3aR,5R,5aS,8aR,9S,9aS)-9-hydrox   | 70.36  | 0.19 | NA          | 14996421 | TCMSP |
|   |      |            |                   | sitosterol                            | 36.91  | 0.75 | 83-46-5     | 12303645 | TCMSP |
|   |      |            |                   | Stigmasterol                          | 43.83  | 0.76 | 83-48-7     | 5280794  | TCMSP |
|   |      |            |                   | Quercetin der.                        | 46.45  | 0.33 | 4382-17-6   | 5316900  | TCMSP |
|   |      |            |                   | nobiletin                             | 61.67  | 0.52 | 478-01-3    | 72344    | TCMSP |
|   |      |            |                   | [(3S,4aR,6aR,6aR,6bR,8aR,12S,12aR,    | 43.08  | 0.74 | 6426-43-3   | 13889352 | TCMSP |
|   |      |            |                   | [(2S)-2-[(2S)-2-(benzoylamino)-3-ph   | 58.02  | 0.52 | 56121-42-7  | 10026486 | TCMSP |
|   |      |            |                   | Helenalin                             | 77.01  | 0.19 | 6754-13-8   | 23205    | TCMSP |
|   |      |            |                   | quercetin                             | 46.43  | 0.28 | 117-39-5    | 5280343  | TCMSP |
|   |      |            |                   | beta-sitosterol                       | 36.91  | 0.75 | 83-46-5     | 222284   | TCMSP |
|   |      |            |                   | Taraxerol                             | 38.4   | 0.77 | 22076-46-6  | 92097    | TCMSP |
|   |      |            |                   | lupeol acetate                        | 9.1    | 0.76 | 163181-18-8 | 92157    | CSDB  |
|   |      |            |                   | taraxasterol acetate                  | 43.08  | 0.74 | 6426-43-3   | 13889352 | CSDB  |
|   |      |            |                   | hexacosanol                           | 10.95  | 0.35 | 506-52-5    | 68171    | CSDB  |
|   |      |            |                   | ceryl alcohol                         | 10.95  | 0.35 | 506-52-5    | 68171    | CSDB  |
|   |      |            |                   | tetatriacontanyl nonadecanoate        | NA     | NA   | 94410-18-1  | 14633237 | CSDB  |
|   |      |            |                   | arnicolide C                          | NA     | NA   | 34532-67-7  | 14656910 | CSDB  |
|   |      |            |                   | taraxasterol                          | 17.6   | 0.76 | NA          | 115250   | CSDB  |
|   |      |            |                   | nobiletin                             | 61.67  | 0.52 | 478-01-3    | 72344    | CSDB  |
|   |      |            |                   | 1β,2α,3β,19α,23-pentahydroxy urs-12-  | NA     | NA   | 6993-85-8   | NA       | CSDB  |
|   |      |            |                   | 3α,16α,21α,22α,28-pentahydroxy olear  | NA     | NA   | 6992-71-4   | NA       | CSDB  |
|   |      |            |                   | 3α,16α,21β,22α,28-pentahydroxy olear  | NA     | NA   | 4220-57-2   | NA       | CSDB  |
|   |      |            |                   | 3β,16α,21β,22α,28-pentahydroxy olean  | NA     | NA   | 122548-12-3 | NA       | CSDB  |
|   |      |            |                   | aurantiamide acetate                  | NA     | NA   | 56121-42-7  | 9832120  | CSDB  |
|   |      |            |                   | 3,3',5,5'-tetramethoxystibene         | NA     | NA   | 8988-46-9   | NA       | CSDB  |
|   |      |            |                   | 1α,3β,19α,23-tetrahydroxy urs-12-ene- | NA     | NA   | 6993-63-9   | NA       | CSDB  |
|   |      |            |                   | 3α,21α,22α,28-tetrahydroxyolean-12-e  | NA     | NA   | 6992-25-0   | NA       | CSDB  |
|   |      |            |                   | 3α,21β,22α,28-tetrahydroxyolean-12-e  | NA     | NA   | 122697-36-3 | NA       | CSDB  |
|   |      |            |                   | lupeol                                | 12.12  | 0.78 | 545-47-1    | 259846   | CSDB  |
|   |      |            |                   | apigenin                              | 23.06  | 0.21 | 520-36-5    | 5280443  | CSDB  |
|   |      |            |                   | stigmasterol                          | 43.83  | 0.76 | 83-48-7     | 5280794  | CSDB  |
|   |      |            |                   | α-cyperone                            | NA     | NA   | NA          | 273568   | CSDB  |
|   |      |            |                   | helenalin                             | 77.01  | 0.19 | 6754-13-8   | 23205    | CSDB  |
|   |      |            |                   | taraxasteryl palmitate                | NA     | NA   | 29803-90-5  | NA       | CSDB  |
|   |      |            |                   | evifolin                              | 27.19  | 0.06 | 90-24-4     | 66654    | CSDB  |
|   |      |            |                   | quercetin-3',3'-dimethyl ether        | 46.45  | 0.33 | 4382-17-6   | 5316900  | CSDB  |
|   |      |            |                   | guercetin-3-O-methyl ether            | 10.1   | 0.3  | 1486-70-0   | 5280681  | CSDB  |
|   |      |            |                   | 9,10-diisobutyryloxy-8-hydroxythymol  | NA     | NA   | NA          | NA       | CSDB  |
|   |      |            |                   | senecioplplenolin                     | NA     | NA   | NA          | NA       | CSDB  |
|   |      |            |                   | 6-O-senecioplplenolin                 | NA     | NA   | NA          | NA       | CSDB  |
|   |      |            |                   | 5,6,7,8,3',4'-hexamethoxy flavone     | 61.67  | 0.52 | 478-01-3    | 72344    | CSDB  |
|   |      |            |                   | 3,5,4'-trimethoxy-trans-stibene       | NA     | NA   | 8973-54-4   | NA       | CSDB  |
|   |      |            |                   | tetrahydrohelenalin                   | NA     | NA   | NA          | 16745539 | CSDB  |
|   |      |            |                   | 2α,3β,19α,23-tetrahydroxy urs-12-ene- | NA     | NA   | NA          | NA       | CSDB  |
|   |      |            |                   | 2α,21β,22α,28-tetrahydroxyolean-12-e  | NA     | NA   | NA          | NA       | CSDB  |
|   |      |            |                   | isobutyrylplenolin                    | NA     | NA   | NA          | NA       | CSDB  |
|   |      |            |                   | 10-isobutyryloxy-8,9-epoxythymol-isc  | NA     | NA   | NA          | NA       | CSDB  |
|   |      |            |                   | florilenalin isobutyrate              | NA     | NA   | NA          | NA       | CSDB  |
|   |      |            |                   | 2-isopropyl-5-methylhydroquinone-4-C  | NA     | NA   | NA          | NA       | CSDB  |
|   |      |            |                   | 6-hydroxy-hexacos-trans-8-ene-3-one   | NA     | NA   | NA          | NA       | CSDB  |
|   |      |            |                   | quercetin-3,7,3'-trimethyl ether      | 13.89  | 0.37 | NA          | 5281677  | CSDB  |
|   |      |            |                   | quercetin-3,7,3',4'-tetramethyl ether | 25.45  | 0.4  | NA          | 5352005  | CSDB  |
|   |      |            |                   | (2R,3R)-(+)-7,4&#39;-di-O-methyl-dif  | NA     | NA   | NA          | NA       | TCMID |
|   |      |            |                   | (-)-epipinoresinol                    | NA     | NA   | NA          | 12309639 | TCMID |
|   |      |            |                   | 11 alpha-methoxysaikosaponin f        | NA     | NA   | NA          | 11968743 | TCMID |
|   |      |            |                   | 3,3&#39;-dimethylquercetin            | 46.45  | 0.33 | 4382-17-6   | 5316900  | TCMID |
|   |      |            |                   | 3-Methoxy-quercetin                   | 10.1   | 0.3  | 1486-70-0   | 5280681  | TCMID |
|   |      |            |                   | 3-O-caffeoyl-α-glucopyranose          | NA     | NA   | NA          | NA       | TCMID |
|   |      |            |                   | 3-O-caffeoyl-β-glucopyranose          | NA     | NA   | NA          | NA       | TCMID |
|   |      |            |                   | 5,8,4&#39;-trihydroxy-7-methoxyisofla | NA     | NA   | NA          | NA       | TCMID |
|   |      |            |                   | anomalamide                           | NA     | NA   | NA          | 13855372 | TCMID |
|   |      |            |                   | apigenin                              | NA     | NA   | NA          | 25200950 | TCMID |
|   |      |            |                   | arnicolide c                          | NA     | NA   | NA          | 14656910 | TCMID |
|   |      |            |                   | arnidiol                              | NA     | NA   | NA          | 5320220  | TCMID |
|   |      |            |                   | aurantiamide acetate                  | NA     | NA   | NA          | 5321123  | TCMID |
|   |      |            |                   | beta-stigmasterol                     | 43.83  | 0.76 | 83-48-7     | 5280794  | TCMID |
|   |      |            |                   | brevifolin                            | NA     | NA   | NA          | 10131135 | TCMID |
|   |      |            |                   | ceryl alcohol                         | 10.95  | 0.35 | 506-52-5    | 68171    | TCMID |
|   |      |            |                   | gliadin                               | NA     | NA   | NA          | 17787981 | TCMID |
|   |      |            |                   | Hirsute prime ragweed                 | NA     | NA   | NA          | NA       | TCMID |
|   |      |            |                   | iristectorin                          | NA     | NA   | NA          | 44257353 | TCMID |
|   |      |            |                   | lupeol                                | NA     | NA   | NA          | 44586882 | TCMID |
|   |      |            |                   | plenolin                              | NA     | NA   | NA          | 6325824  | TCMID |
|   |      |            |                   | quercetin                             | NA     | NA   | NA          | 46906036 | TCMID |
|   |      |            |                   | quercetin 3,3'-dimethyl ether         | NA     | NA   | NA          | NA       | TCMID |
|   |      |            |                   | quercetin-3-methyl ether              | 10.1   | 0.3  | 1486-70-0   | 5280681  | TCMID |
|   |      |            |                   | quercetrin 3-methylether              | NA     | NA   | NA          | NA       | TCMID |
|   |      |            |                   | sitosterol                            | NA     | NA   | NA          | 222284   | TCMID |
|   |      |            |                   | stigmasterol                          | NA     | NA   | NA          | 50930798 | TCMID |
|   |      |            |                   | stigmasterol-beta-d-glucoside         | NA     | NA   | NA          | 70699355 | TCMID |
|   |      |            |                   | taraxasterol                          | NA     | NA   | NA          | 5270604  | TCMID |
|   |      |            |                   | taraxasteryl palmitate                | NA     | NA   | NA          | 14055767 | TCMID |
|   |      |            |                   | taraxe-rol                            | NA     | NA   | NA          | NA       | TCMID |
|   |      |            |                   | triterpenoid saponin                  | NA     | NA   | NA          | 73362    | TCMID |
| 4 | 雄黄   | Xionghuang | Realgar           | As                                    | NA     | NA   | NA          | 49773122 | TCMID |

|   |     |           |                          |                                                     |       |      |             |           |       |
|---|-----|-----------|--------------------------|-----------------------------------------------------|-------|------|-------------|-----------|-------|
|   |     |           |                          | As2S2                                               | NA    | NA   | NA          | NA        | TCMID |
|   |     |           |                          | As2S3                                               | NA    | NA   | NA          | 6337004   | TCMID |
|   |     |           |                          | realgar                                             | NA    | NA   | NA          | 6328537   | TCMID |
| 5 | 银柴胡 | Yinchaihu | <i>Stellariae Radix</i>  | sitosterol                                          | 36.91 | 0.75 | 83-46-5     | 12303645  | TCMSP |
|   |     |           |                          | Spinasterol                                         | 42.98 | 0.76 | 481-18-5    | 5281331   | TCMSP |
|   |     |           |                          | Stigmasterol                                        | 43.83 | 0.76 | 83-48-7     | 5280794   | TCMSP |
|   |     |           |                          | stigmast-7-enol-glucoside qt                        | 37.42 | 0.75 | NA          | NA        | TCMSP |
|   |     |           |                          | dichotomine,d                                       | 38.8  | 0.36 | NA          | NA        | TCMSP |
|   |     |           |                          | 3-[3-[5-(2-carboxyethyl)-2-hydroxy-3- $\beta$ -     | 31.6  | 0.74 | NA          | 11203673  | TCMSP |
|   |     |           |                          | dichotomide,b                                       | 48.57 | 0.69 | NA          | NA        | TCMSP |
|   |     |           |                          | dichotomide,c                                       | 48.87 | 0.7  | NA          | NA        | TCMSP |
|   |     |           |                          | dichotomide,d                                       | 49.69 | 0.59 | NA          | NA        | TCMSP |
|   |     |           |                          | butyl 3-[3-methoxy-4-[(2S,3R,4S,5S,6                | 32.98 | 0.46 | NA          | 11327449  | TCMSP |
|   |     |           |                          | stigmasta-7,22-dien-3 $\beta$ -ol                   | 42.98 | 0.76 | 481-18-5    | 5281331   | CSDB  |
|   |     |           |                          | stigmast-7-enol                                     | 13.01 | 0.76 | 481-19-6    | 12303924  | CSDB  |
|   |     |           |                          | stigmast-7-enol-glucoside                           | 20.67 | 0.62 | 61376-86-1  | 124879    | CSDB  |
|   |     |           |                          | stigmasterol                                        | 43.83 | 0.76 | 83-48-7     | 5280794   | CSDB  |
|   |     |           |                          | $\beta$ -sitosterol                                 | 36.91 | 0.75 | 83-46-5     | 222284    | CSDB  |
|   |     |           |                          | $\alpha$ -spinasteryl glucoside                     | 21.2  | 0.63 | 1745-36-4   | 12960505  | CSDB  |
|   |     |           |                          | stellaria cyclopetidel                              | NA    | NA   | NA          | NA        | CSDB  |
|   |     |           |                          | 3-tellaria cyclopeptide                             | NA    | NA   | NA          | NA        | TCMID |
|   |     |           |                          | 3-tigmasterol                                       | NA    | NA   | NA          | NA        | TCMID |
|   |     |           |                          | alpha-spinasterol glucoside                         | NA    | NA   | NA          | NA        | TCMID |
|   |     |           |                          | beta-sitosterol                                     | NA    | NA   | NA          | NA        | TCMID |
|   |     |           |                          | beta-spinasterol                                    | NA    | NA   | NA          | NA        | TCMID |
|   |     |           |                          | dichotomide i                                       | NA    | NA   | NA          | 11244683  | TCMID |
|   |     |           |                          | dichotomide ii                                      | NA    | NA   | NA          | 53322155  | TCMID |
|   |     |           |                          | dichotomine                                         | NA    | NA   | NA          | 11242284  | TCMID |
|   |     |           |                          | dichotomine b                                       | NA    | NA   | NA          | 11173314  | TCMID |
|   |     |           |                          | dichotomine c                                       | NA    | NA   | NA          | 11254673  | TCMID |
|   |     |           |                          | dichotomine d                                       | NA    | NA   | NA          | 11221150  | TCMID |
|   |     |           |                          | dichotomide                                         | NA    | NA   | NA          | 10439386  | TCMID |
|   |     |           |                          | dichotomide b                                       | NA    | NA   | NA          | 11490410  | TCMID |
|   |     |           |                          | dichotomide c                                       | NA    | NA   | NA          | 10439386  | TCMID |
|   |     |           |                          | dichotomide d                                       | NA    | NA   | NA          | 10439386  | TCMID |
|   |     |           |                          | dichotomide e                                       | 32.98 | 0.46 | NA          | 11327449  | TCMID |
|   |     |           |                          | furfurylalcohol                                     | NA    | NA   | NA          | NA        | TCMID |
|   |     |           |                          | glucodichotomine b                                  | NA    | NA   | NA          | 11154764  | TCMID |
|   |     |           |                          | gypsogenin                                          | NA    | NA   | NA          | 44451366  | TCMID |
|   |     |           |                          | gypsoside                                           | NA    | NA   | NA          | 167308    | TCMID |
|   |     |           |                          | stellaria cyclopeptide                              | 8.67  | 0.55 | 137476-73-4 | 6444028   | TCMID |
|   |     |           |                          | stemonine                                           | NA    | NA   | NA          | 155331    | TCMID |
|   |     |           |                          | stigmast-7-enol                                     | NA    | NA   | NA          | NA        | TCMID |
|   |     |           |                          | stigmast-7-enol glucoside                           | NA    | NA   | NA          | NA        | TCMID |
|   |     |           |                          | wogonin                                             | 30.68 | 0.23 | 632-85-9    | 5281703   | TCMID |
|   |     |           |                          | $\alpha$ -spinasterol- $\beta$ -d-glucoside         | NA    | NA   | NA          | 101932119 | TCMID |
| 6 | 桂枝  | Guizhi    | <i>Cinnamomi Ramulus</i> | (-)-taxifolin                                       | 60.51 | 0.27 | 480-18-2    | 712316    | TCMSP |
|   |     |           |                          | beta-sitosterol                                     | 36.91 | 0.75 | 83-46-5     | 222284    | TCMSP |
|   |     |           |                          | sitosterol                                          | 36.91 | 0.75 | 83-46-5     | 12303645  | TCMSP |
|   |     |           |                          | (+)-catechin                                        | 54.83 | 0.24 | 154-23-4    | 9064      | TCMSP |
|   |     |           |                          | ent-Epicatechin                                     | 48.96 | 0.24 | 35323-91-2  | 182232    | TCMSP |
|   |     |           |                          | taxifolin                                           | 57.84 | 0.27 | 480-18-2    | 439533    | TCMSP |
|   |     |           |                          | Peroxyergosterol                                    | 44.39 | 0.82 | 2061-64-5   | NA        | TCMSP |
|   |     |           |                          | cinnamyl acetate                                    | 21.15 | 0.04 | 21040-45-9  | 5282110   | CSDB  |
|   |     |           |                          | benzyl benzoate                                     | 18.64 | 0.09 | 120-51-4    | 2345      | CSDB  |
|   |     |           |                          | coumarin                                            | 29.17 | 0.04 | 91-64-5     | 323       | CSDB  |
|   |     |           |                          | cinnamaldehyde                                      | 31.99 | 0.02 | 104-55-2    | 637511    | CSDB  |
|   |     |           |                          | calamenene                                          | 17.47 | 0.08 | 22339-23-7  | 11298625  | CSDB  |
|   |     |           |                          | $\beta$ -cadinene                                   | 17.12 | 0.08 | NA          | 10657     | CSDB  |
|   |     |           |                          | (+)-2,3-dihydro-2-(1-methylethenyl)-5               | NA    | NA   | NA          | 5316729   | TCMID |
|   |     |           |                          | 2,3,4-trihydroxycinnamaldehyde                      | NA    | NA   | NA          | 98373     | TCMID |
|   |     |           |                          | 2-methoxycinnamaldehyde                             | NA    | NA   | NA          | 25021887  | TCMID |
|   |     |           |                          | 3,4-dihydroxybenzoic acid                           | 25.37 | 0.04 | 99-50-3     | 72        | TCMID |
|   |     |           |                          | 3-(4-hydroxyphenyl)-trans-propenoic ac              | NA    | NA   | NA          | 5318320   | TCMID |
|   |     |           |                          | 3-o-p-hydroxy-trans-cinnamoylmaslinic               | NA    | NA   | NA          | NA        | TCMID |
|   |     |           |                          | 5-cinnamoyl-9-o-acetylphototaxicin i                | NA    | NA   | NA          | 5315893   | TCMID |
|   |     |           |                          | acetic acid                                         | NA    | NA   | NA          | 29927927  | TCMID |
|   |     |           |                          | anethole                                            | 30.86 | 0.03 | 25679-28-1  | 1549040   | TCMID |
|   |     |           |                          | anhydrocinnzeylanine                                | NA    | NA   | NA          | 11465803  | TCMID |
|   |     |           |                          | anhydrocinnzeylanol                                 | NA    | NA   | NA          | 11783510  | TCMID |
|   |     |           |                          | benzaldehyde                                        | NA    | NA   | NA          | 20375919  | TCMID |
|   |     |           |                          | camphor                                             | NA    | NA   | NA          | 23308299  | TCMID |
|   |     |           |                          | cinnamaldehyde                                      | 31.99 | 0.02 | 14371-10-9  | 637511    | TCMID |
|   |     |           |                          | cinnamic aldehyde                                   | 27.21 | 0.02 | 57194-69-1  | 6428995   | TCMID |
|   |     |           |                          | cinnamic acid                                       | 19.68 | 0.03 | 621-82-9    | 444539    | TCMID |
|   |     |           |                          | cinnamyl alcohol                                    | 38.35 | 0.02 | 4510-34-3   | 5315892   | TCMID |
|   |     |           |                          | coumarin                                            | 29.17 | 0.02 | 91-64-5     | 323       | TCMID |
|   |     |           |                          | coumarinic acid                                     | NA    | NA   | NA          | 54714352  | TCMID |
|   |     |           |                          | dihydromelilotoside                                 | NA    | NA   | NA          | 5316728   | TCMID |
|   |     |           |                          | farnesol                                            | NA    | NA   | NA          | 42626572  | TCMID |
|   |     |           |                          | gamma-sitosterol                                    | NA    | NA   | NA          | 636741    | TCMID |
|   |     |           |                          | melilotic acid                                      | NA    | NA   | NA          | NA        | TCMID |
|   |     |           |                          | melilotocarpan                                      | 48.41 | 0.43 | 61135-95-3  | 442792    | TCMID |
|   |     |           |                          | nerolidol                                           | 40.43 | 0.06 | 142-50-7    | 11241545  | TCMID |
|   |     |           |                          | proanthocyanidin b2                                 | 3.01  | 0.66 | 29106-49-8  | 122738    | TCMID |
|   |     |           |                          | procumamol                                          | 25.01 | 0.1  | 127214-97-5 | 10263440  | TCMID |
|   |     |           |                          | protocatechuic acid                                 | NA    | NA   | NA          | 54675866  | TCMID |
|   |     |           |                          | protocatechuic acid-3-glucoside                     | 11.51 | 0.22 | NA          | 11972438  | TCMID |
|   |     |           |                          | styrene                                             | 29.55 | 0.01 | 79637-11-9  | 7501      | TCMID |
|   |     |           |                          | tetradecanal                                        | 12.36 | 0.05 | 511542-15-7 | 31291     | TCMID |
|   |     |           |                          | trans-cinnamic acid                                 | NA    | NA   | NA          | 5957728   | TCMID |
|   |     |           |                          | $\beta$ -sitosterol                                 | 36.91 | 0.75 | 83-46-5     | 222284    | TCMID |
| 7 | 金沸草 | Jinfeicao | <i>Inulae Herba</i>      | Britanin                                            | 33.73 | 0.41 | NA          | 5315501   | TCMSP |
|   |     |           |                          | quercetagetin                                       | 45.01 | 0.31 | 90-18-6     | 5281680   | TCMSP |
|   |     |           |                          | beta-sitosterol                                     | 36.91 | 0.75 | 83-46-5     | 222284    | TCMSP |
|   |     |           |                          | inulicin                                            | 30.12 | 0.22 | 33627-41-7  | NA        | TCMSP |
|   |     |           |                          | Patuletin                                           | 53.11 | 0.34 | 519-96-0    | 5281678   | TCMSP |
|   |     |           |                          | [(3S,4aR,6aR,6aR,6bR,8aR,12S,12aR,                  | 43.08 | 0.74 | 6426-43-3   | 13889352  | TCMSP |
|   |     |           |                          | luteolin                                            | 36.16 | 0.25 | 491-70-3    | 5280445   | TCMSP |
|   |     |           |                          | quercetin                                           | 46.43 | 0.28 | 117-39-5    | 5280343   | TCMSP |
|   |     |           |                          | 3 $\beta$ ,16 $\beta$ -dihydroxy-lupeol-3-myristate | NA    | NA   | NA          | NA        | CSDB  |
|   |     |           |                          | 3 $\beta$ ,16 $\beta$ -dihydroxy-lupeol-3-palmitate | NA    | NA   | NA          | NA        | CSDB  |
|   |     |           |                          | patulitrin                                          | NA    | NA   | 19833-25-1  | 5483974   | CSDB  |
|   |     |           |                          | guercetol                                           | 46.43 | 0.28 | 117-39-5    | 5280343   | CSDB  |
|   |     |           |                          | taraxasterol                                        | 17.6  | 0.76 | NA          | 115250    | CSDB  |
|   |     |           |                          | esculetin                                           | 22.97 | 0.07 | 305-01-1    | 5281416   | CSDB  |
|   |     |           |                          | gaillardin                                          | NA    | NA   | 14682-46-3  | 267247    | CSDB  |
|   |     |           |                          | luteolin                                            | 36.16 | 0.25 | 491-70-3    | 5280445   | CSDB  |
|   |     |           |                          | salicylic acid                                      | 32.13 | 0.03 | 69-72-7     | 338       | CSDB  |
|   |     |           |                          | 15-deoxy-cis,cis-artemisifolin                      | NA    | NA   | NA          | NA        | CSDB  |
|   |     |           |                          | scopoletin                                          | 27.77 | 0.08 | 92-61-5     | 5280460   | CSDB  |
|   |     |           |                          | 6-methoxyluteolin-7-glucoside                       | NA    | NA   | 569-90-4    | 120742    | CSDB  |
|   |     |           |                          | p-coumaric acid                                     | 43.29 | 0.04 | 7400-08-0   | 637542    | CSDB  |

|   |     |           |                         |                                                                                                                                                                 |       |      |             |           |       |
|---|-----|-----------|-------------------------|-----------------------------------------------------------------------------------------------------------------------------------------------------------------|-------|------|-------------|-----------|-------|
|   |     |           |                         | p-hydroxyphenyl acetic acid                                                                                                                                     | 41.89 | 0.03 | 156-38-7    | 127       | CSDB  |
|   |     |           |                         | p-hydroxybenzoic acid                                                                                                                                           | NA    | NA   | 99-96-7     | 135       | CSDB  |
|   |     |           |                         | olean-13(18)-en-3-acetate                                                                                                                                       | NA    | NA   | NA          | NA        | CSDB  |
|   |     |           |                         | isochlorogenic acid                                                                                                                                             | NA    | NA   | 2450-53-5   | 6474310   | CSDB  |
|   |     |           |                         | isoquercitrin                                                                                                                                                   | 1.86  | 0.77 | 482-35-9    | 5280804   | CSDB  |
|   |     |           |                         | $\beta$ -sitosterol-3-O- $\beta$ -D-glucopyranoside                                                                                                             | 20.63 | 0.62 | 474-58-8    | 5742590   | CSDB  |
|   |     |           |                         | ferulic acid                                                                                                                                                    | 39.56 | 0.06 | 1135-24-6   | 445858    | CSDB  |
|   |     |           |                         | epifriedelanol                                                                                                                                                  | 27.34 | 0.76 | 16844-71-6  | 119242    | CSDB  |
|   |     |           |                         | britanin                                                                                                                                                        | NA    | NA   | 33627-28-0  | 14466541  | CSDB  |
|   |     |           |                         | chlorogenic acid                                                                                                                                                | 11.93 | 0.33 | 327-97-9    | 1794427   | CSDB  |
|   |     |           |                         | caffeic acid                                                                                                                                                    | 25.76 | 0.05 | 331-39-5    | 689043    | CSDB  |
|   |     |           |                         | ivalin                                                                                                                                                          | NA    | NA   | 5938-03-4   | 65156     | CSDB  |
|   |     |           |                         | $\beta$ -amyrin palmitate                                                                                                                                       | NA    | NA   | 5973-06-8   | 13915599  | CSDB  |
|   |     |           |                         | protocatechuic acid                                                                                                                                             | 25.37 | 0.04 | 99-50-3     | 72        | CSDB  |
|   |     |           |                         | tomentosin                                                                                                                                                      | NA    | NA   | 33649-15-9  | 155173    | CSDB  |
|   |     |           |                         | inuchinenolide A                                                                                                                                                | NA    | NA   | 79383-84-9  | 75249808  | CSDB  |
|   |     |           |                         | inulicin                                                                                                                                                        | NA    | NA   | 33627-41-7  | 75528891  | CSDB  |
|   |     |           |                         | 6-hydroxykaempferol-3-sulphate                                                                                                                                  | NA    | NA   | 112663-87-3 | NA        | CSDB  |
|   |     |           |                         | 3 $\beta$ -hydroxy-2 $\alpha$ -seneciolyloxyisoolantolide                                                                                                       | NA    | NA   | NA          | NA        | CSDB  |
|   |     |           |                         | 6-hydroxyluteolin-7-O-diglucoside                                                                                                                               | NA    | NA   | 88437-36-9  | NA        | CSDB  |
|   |     |           |                         | 6-hydroxyluteolin-7-O-D-glucoside                                                                                                                               | 1.91  | 0.79 | 54300-65-1  | 185766    | CSDB  |
|   |     |           |                         | 5'-caffeoylquinic acid                                                                                                                                          | 19.61 | 0.33 | 906-33-2    | 5280633   | CSDB  |
|   |     |           |                         | quercimeritrin                                                                                                                                                  | 2.85  | 0.79 | 491-50-9    | 5282160   | CSDB  |
|   |     |           |                         | quercetin-7-glucuronoglucoside                                                                                                                                  | NA    | NA   | NA          | NA        | CSDB  |
|   |     |           |                         | quercetin-3-O-sulphate                                                                                                                                          | NA    | NA   | 97736-73-7  | 21676162  | CSDB  |
|   |     |           |                         | inuchinenolide B                                                                                                                                                | NA    | NA   | 79464-34-9  | 57399053  | CSDB  |
|   |     |           |                         | inuchinenolide C                                                                                                                                                | NA    | NA   | 79383-83-8  | 14543627  | CSDB  |
|   |     |           |                         | tomentosin                                                                                                                                                      | 55.52 | 0.13 | 33649-15-9  | 155173    | CSDB  |
|   |     |           |                         | 6-methoxyquercetin-7-glucoside                                                                                                                                  | NA    | NA   | NA          | NA        | CSDB  |
|   |     |           |                         | nepetrin                                                                                                                                                        | NA    | NA   | NA          | NA        | CSDB  |
|   |     |           |                         | 4-epiisoinviscolide                                                                                                                                             | NA    | NA   | NA          | NA        | CSDB  |
|   |     |           |                         | 1,6 $\alpha$ -dihydroxy-4 $\alpha$ -1,10-secoeudesmanol                                                                                                         | NA    | NA   | NA          | 50915268  | TCMID |
|   |     |           |                         | 1-acetoxy-6 $\alpha$ -hydroxy-4 $\alpha$ -1,10-secoeudesmanol                                                                                                   | NA    | NA   | NA          | NA        | TCMID |
|   |     |           |                         | 11 $\alpha$ ,13-dihydroxanthalongin                                                                                                                             | NA    | NA   | NA          | 14282664  | TCMID |
|   |     |           |                         | 1 $\beta$ -hydroxy-4 $\alpha$ ,11 $\alpha$ -eudesma-5-en-12,8-dione                                                                                             | NA    | NA   | NA          | NA        | TCMID |
|   |     |           |                         | 1 $\beta$ -hydroxy-8 $\beta$ -acetoxyisocostic acid methyl ester                                                                                                | NA    | NA   | NA          | NA        | TCMID |
|   |     |           |                         | 1 $\beta$ -hydroxy-8 $\beta$ -acetoxyisocostic acid methyl ester                                                                                                | NA    | NA   | NA          | NA        | TCMID |
|   |     |           |                         | 1 $\beta$ -hydroxy-alantolactone                                                                                                                                | NA    | NA   | NA          | 71573444  | TCMID |
|   |     |           |                         | 4h-xanthalongin                                                                                                                                                 | NA    | NA   | NA          | 26183548  | TCMID |
|   |     |           |                         | arnicolide c                                                                                                                                                    | NA    | NA   | NA          | 14656910  | TCMID |
|   |     |           |                         | asperilin                                                                                                                                                       | NA    | NA   | NA          | 257274    | TCMID |
|   |     |           |                         | aurantiamide acetate                                                                                                                                            | NA    | NA   | NA          | 5321123   | TCMID |
|   |     |           |                         | britanin                                                                                                                                                        | NA    | NA   | NA          | 11875880  | TCMID |
|   |     |           |                         | cinnamic acid                                                                                                                                                   | NA    | NA   | NA          | 6857483   | TCMID |
|   |     |           |                         | dihydroisoolantolactone                                                                                                                                         | NA    | NA   | NA          | 6451323   | TCMID |
|   |     |           |                         | inuchinenolide                                                                                                                                                  | 26    | 0.21 | 79383-84-9  | 46906384  | TCMID |
|   |     |           |                         | inuchinenolide b                                                                                                                                                | NA    | NA   | NA          | 57399053  | TCMID |
|   |     |           |                         | inuchinenolide c                                                                                                                                                | NA    | NA   | NA          | 44457222  | TCMID |
|   |     |           |                         | inulicin                                                                                                                                                        | 73.35 | 0.22 | 33627-41-7  | 442263    | TCMID |
|   |     |           |                         | inumakilactone c                                                                                                                                                | NA    | NA   | NA          | 5318451   | TCMID |
|   |     |           |                         | inuviscolide                                                                                                                                                    | NA    | NA   | NA          | 176489    | TCMID |
|   |     |           |                         | isoolantolactone                                                                                                                                                | NA    | NA   | NA          | 10130839  | TCMID |
|   |     |           |                         | ivangustin                                                                                                                                                      | NA    | NA   | NA          | 102032677 | TCMID |
|   |     |           |                         | luteolin                                                                                                                                                        | NA    | NA   | NA          | 25201972  | TCMID |
|   |     |           |                         | taraxasterol                                                                                                                                                    | NA    | NA   | NA          | 5270604   | TCMID |
|   |     |           |                         | taraxasterol palmitate                                                                                                                                          | NA    | NA   | NA          | 92966441  | TCMID |
|   |     |           |                         | tomentosin                                                                                                                                                      | NA    | NA   | NA          | 540288    | TCMID |
|   |     |           |                         | toonacilin                                                                                                                                                      | NA    | NA   | NA          | 6326189   | TCMID |
|   |     |           |                         | xanthalongin                                                                                                                                                    | NA    | NA   | NA          | 14109627  | TCMID |
| 8 | 皂角刺 | Zaojiaoci | <i>Gleditsiae Spina</i> | fisetin                                                                                                                                                         | 52.6  | 0.24 | 528-48-3    | 5281614   | TCMSP |
|   |     |           |                         | Fustin                                                                                                                                                          | 50.91 | 0.24 | 20725-03-5  | 5317435   | TCMSP |
|   |     |           |                         | (-)-taxifolin                                                                                                                                                   | 60.51 | 0.27 | 29838-67-3  | 712316    | TCMSP |
|   |     |           |                         | Eriodyctiol (flavanone)                                                                                                                                         | 41.35 | 0.24 | 4049-38-1   | 373261    | TCMSP |
|   |     |           |                         | beta-sitosterol                                                                                                                                                 | 36.91 | 0.75 | 83-46-5     | 222284    | TCMSP |
|   |     |           |                         | sitosterol                                                                                                                                                      | 36.91 | 0.75 | 64997-52-0  | 12303645  | TCMSP |
|   |     |           |                         | kaempferol                                                                                                                                                      | 41.88 | 0.24 | 520-18-3    | 5280863   | TCMSP |
|   |     |           |                         | Stigmasterol                                                                                                                                                    | 43.83 | 0.76 | 83-48-7     | 5280794   | TCMSP |
|   |     |           |                         | Stigmast-4-ene-3,6-dione                                                                                                                                        | 39.12 | 0.79 | 23670-94-2  | 5490007   | TCMSP |
|   |     |           |                         | ent-Epicatechin                                                                                                                                                 | 48.96 | 0.24 | 35323-91-2  | 182232    | TCMSP |
|   |     |           |                         | quercetin                                                                                                                                                       | 46.43 | 0.28 | 117-39-5    | 5280343   | TCMSP |
|   |     |           |                         | 2-aminoimidazole                                                                                                                                                | NA    | NA   | NA          | 82140     | TCMID |
|   |     |           |                         | 3-O-caffeoylquinic acid methyl ester                                                                                                                            | 9.97  | 0.36 | NA          | 6476139   | TCMID |
|   |     |           |                         | 3-O-trans-feruloylquinic acid                                                                                                                                   | NA    | NA   | NA          | 101088581 | TCMID |
|   |     |           |                         | 4-hydroxy-3-methoxybenzamide                                                                                                                                    | NA    | NA   | NA          | 354088    | TCMID |
|   |     |           |                         | 5,7-dihydroxy-chromone                                                                                                                                          | NA    | NA   | NA          | NA        | TCMID |
|   |     |           |                         | E-cinnamic acid                                                                                                                                                 | 19.68 | 0.03 | 621-82-9    | 444539    | TCMID |
|   |     |           |                         | gleditsiasaaponin b-g                                                                                                                                           | NA    | NA   | NA          | NA        | TCMID |
|   |     |           |                         | nonacosane                                                                                                                                                      | 8.12  | 0.39 | 630-03-5    | 12409     | TCMID |
|   |     |           |                         | palmitic acid                                                                                                                                                   | NA    | NA   | NA          | 18413781  | TCMID |
|   |     |           |                         | protocatechuic acid                                                                                                                                             | NA    | NA   | NA          | 54675866  | TCMID |
|   |     |           |                         | threo-guaiacylglycerol- $\beta$ -coniferyl aldehyde                                                                                                             | NA    | NA   | NA          | NA        | TCMID |
|   |     |           |                         | trans-caffeic acid                                                                                                                                              | 25.76 | 0.05 | 71693-97-5  | 689043    | TCMID |
|   |     |           |                         | vanillic acid                                                                                                                                                   | NA    | NA   | NA          | 54675858  | TCMID |
| 9 | 旋覆花 | Xuanfuhua | <i>Inulae Flos</i>      | Chryseriol                                                                                                                                                      | 35.85 | 0.27 | 491-71-4    | 5280666   | TCMSP |
|   |     |           |                         | Pratensein                                                                                                                                                      | 39.06 | 0.28 | 2284-31-3   | 5281803   | TCMSP |
|   |     |           |                         | isorhamnetin                                                                                                                                                    | 49.6  | 0.31 | 480-19-3    | 5281654   | TCMSP |
|   |     |           |                         | beta-sitosterol                                                                                                                                                 | 36.91 | 0.75 | 83-46-5     | 222284    | TCMSP |
|   |     |           |                         | amyrin Palmitate                                                                                                                                                | 32.68 | 0.3  | 559-70-6    | NA        | TCMSP |
|   |     |           |                         | Isoramanone                                                                                                                                                     | 39.97 | 0.51 | 4644-99-9   | NA        | TCMSP |
|   |     |           |                         | Tamarixetin                                                                                                                                                     | 32.86 | 0.31 | 603-61-2    | 5281699   | TCMSP |
|   |     |           |                         | inulicin                                                                                                                                                        | 30.12 | 0.22 | 33627-41-7  | NA        | TCMSP |
|   |     |           |                         | 3-[(3aS,4R,5R,8aR)-4-hydroxy-5,7-dimethyl-2,3-dihydro-1H-benzofuran-2-ylidene]-4-hydroxy-5,7-dimethyl-2,3-dihydro-1H-benzofuran-2-one                           | 73.35 | 0.22 | 33627-41-7  | 442263    | TCMSP |
|   |     |           |                         | [(3aR,4R,7aR)-5-[(1S)-4-acetoxy-1-methyl-2-pyrrolidinylidene]-6-oxo-1,2,3,4-tetrahydropyridin-2-ylidene]-4-hydroxy-5,7-dimethyl-2,3-dihydro-1H-benzofuran-2-one | 39.03 | 0.31 | NA          | 10360513  | TCMSP |
|   |     |           |                         | Azaleatin                                                                                                                                                       | 54.28 | 0.3  | 529-51-1    | 5281604   | TCMSP |
|   |     |           |                         | Britanin                                                                                                                                                        | 33.73 | 0.41 | NA          | 5315501   | TCMSP |
|   |     |           |                         | epifriedelanol acetate                                                                                                                                          | 31.18 | 0.74 | 131310      | 13688752  | TCMSP |
|   |     |           |                         | Melilotoside                                                                                                                                                    | 36.85 | 0.26 | 618-67-7    | 5280759   | TCMSP |
|   |     |           |                         | Patuletin                                                                                                                                                       | 53.11 | 0.34 | 519-96-0    | 5281678   | TCMSP |
|   |     |           |                         | kaempferol                                                                                                                                                      | 41.88 | 0.24 | 520-18-3    | 5280863   | TCMSP |
|   |     |           |                         | [(3S,4aR,6aR,6bR,8aR,12S,12aR)-6,8-dihydroxy-4H-pyrido[1,2-b:4'-a']pyridine-3-carboxamide, 1,2,3,4-tetrahydro-                                                  | 43.08 | 0.74 | 6426-43-3   | 13889352  | TCMSP |
|   |     |           |                         | luteolin                                                                                                                                                        | 36.16 | 0.25 | 491-70-3    | 5280445   | TCMSP |
|   |     |           |                         | quercetin                                                                                                                                                       | 46.43 | 0.28 | 117-39-5    | 5280343   | TCMSP |
|   |     |           |                         | taraxasterol acetate                                                                                                                                            | 43.08 | 0.74 | 6426-43-3   | 13889352  | CSDB  |
|   |     |           |                         | 4',5'-dimethoxyquercetin                                                                                                                                        | NA    | NA   | NA          | NA        | CSDB  |
|   |     |           |                         | britannilactone                                                                                                                                                 | NA    | NA   | 33620-72-3  | 9970151   | CSDB  |
|   |     |           |                         | guercetol                                                                                                                                                       | 46.43 | 0.28 | 117-39-5    | 5280343   | CSDB  |
|   |     |           |                         | kaempferol                                                                                                                                                      | 41.88 | 0.24 | 520-18-3    | 5280863   | CSDB  |
|   |     |           |                         | taraxasterol                                                                                                                                                    | 17.6  | 0.76 | NA          | 115250    | CSDB  |
|   |     |           |                         | isoquercitrin                                                                                                                                                   | 1.86  | 0.77 | 482-35-9    | 5280804   | CSDB  |
|   |     |           |                         | pratensein                                                                                                                                                      | 39.06 | 0.28 | 2284-31-3   | 5281803   | CSDB  |
|   |     |           |                         | azaleatin                                                                                                                                                       | 54.28 | 0.3  | 529-51-1    | 5281604   | CSDB  |
|   |     |           |                         | alexandrin                                                                                                                                                      | 20.63 | 0.62 | 474-58-8    | 5742590   | CSDB  |
|   |     |           |                         | chlorogenic acid                                                                                                                                                | 11.93 | 0.33 | 327-97-9    | 1794427   | CSDB  |

|    |     |           |                                          |                                                        |        |      |             |           |       |
|----|-----|-----------|------------------------------------------|--------------------------------------------------------|--------|------|-------------|-----------|-------|
|    |     |           |                                          | caffeic acid                                           | 25.76  | 0.05 | 331-39-5    | 689043    | CSDB  |
|    |     |           |                                          | monoacetylbritannilactone                              | 73.35  | 0.22 | 33627-41-7  | 75528891  | CSDB  |
|    |     |           |                                          | tamarixetin                                            | 32.86  | 0.31 | 603-61-2    | 5281699   | CSDB  |
|    |     |           |                                          | 5'-caffeoylquinic acid                                 | 19.61  | 0.33 | 906-33-2    | 5280633   | CSDB  |
|    |     |           |                                          | stearin                                                | 15.13  | 0.13 | 555-43-1    | 11146     | CSDB  |
|    |     |           |                                          | diacetylbritannilactone                                | NA     | NA   | 151513-70-1 | 101485908 | CSDB  |
|    |     |           |                                          | britannilide                                           | NA     | NA   | NA          | NA        | CSDB  |
|    |     |           |                                          | oxobritannilactone                                     | NA     | NA   | NA          | NA        | CSDB  |
|    |     |           |                                          | eremobritannilin                                       | NA     | NA   | NA          | NA        | CSDB  |
|    |     |           |                                          | inulic acid                                            | NA     | NA   | NA          | NA        | CSDB  |
|    |     |           |                                          | (3 S, 5R, 6S, 7E)-5,6-epoxy-3-hydroxy                  | NA     | NA   | NA          | NA        | TCMID |
|    |     |           |                                          | (3S,5R,6S,7E)-5,6-epoxy-3-hydroxy-7-                   | NA     | NA   | NA          | 14605580  | TCMID |
|    |     |           |                                          | (6R,7E)-9-hydroxy-4,7-megastigmadie                    | NA     | NA   | NA          | 21630891  | TCMID |
|    |     |           |                                          | 1,6 $\alpha$ -dihydroxy-4 $\alpha$ -1,10-secoeudesma   | NA     | NA   | NA          | 50915268  | TCMID |
|    |     |           |                                          | 6-o-e-feruloylajugol                                   | NA     | NA   | NA          | 6325178   | TCMID |
|    |     |           |                                          | 6-o-p-hydroxybenzoyl ajugol                            | NA     | NA   | NA          | 6325359   | TCMID |
|    |     |           |                                          | 6 $\alpha$ -isobutyryloxy-1-hydroxy-4 $\alpha$ H-1,10- | NA     | NA   | NA          | NA        | TCMID |
|    |     |           |                                          | 6 $\alpha$ -isovaleryloxy-1-hydroxy-4 $\alpha$ H-1,10- | NA     | NA   | NA          | NA        | TCMID |
|    |     |           |                                          | 8,9,10-Three hydroxy thymol                            | NA     | NA   | NA          | NA        | TCMID |
|    |     |           |                                          | 8,9,10-trihydroxy thymol                               | NA     | NA   | NA          | NA        | TCMID |
|    |     |           |                                          | Ali diol                                               | NA     | NA   | NA          | 5287668   | TCMID |
|    |     |           |                                          | Ali glycol                                             | NA     | NA   | NA          | NA        | TCMID |
|    |     |           |                                          | azaleatin                                              | 54.28  | 0.3  | 529-51-1    | 5281604   | TCMID |
|    |     |           |                                          | beta-amyrin palmitate                                  | NA     | NA   | NA          | 10032370  | TCMID |
|    |     |           |                                          | britanin                                               | NA     | NA   | NA          | 11875880  | TCMID |
|    |     |           |                                          | caffeic acid                                           | NA     | NA   | NA          | 54710367  | TCMID |
|    |     |           |                                          | caffeic acid dimethyl ether                            | 63.86  | 0.07 | 2316-26-9   | 1585026   | TCMID |
|    |     |           |                                          | chlorogenin                                            | NA     | NA   | NA          | 52931478  | TCMID |
|    |     |           |                                          | Coffee ethyl                                           | NA     | NA   | NA          | NA        | TCMID |
|    |     |           |                                          | Dandelion alcohol acetate                              | NA     | NA   | NA          | NA        | TCMID |
|    |     |           |                                          | Dandelion ol acetate                                   | NA     | NA   | NA          | NA        | TCMID |
|    |     |           |                                          | Dihydro mustard alcohol                                | NA     | NA   | NA          | NA        | TCMID |
|    |     |           |                                          | epifriedelanol acetate                                 | NA     | NA   | NA          | 5317394   | TCMID |
|    |     |           |                                          | ethyl caffeate                                         | 103.85 | 0.07 | 66648-50-8  | 5317238   | TCMID |
|    |     |           |                                          | eupatin                                                | 50.8   | 0.41 | 19587-65-6  | 5317287   | TCMID |
|    |     |           |                                          | gaillardin                                             | NA     | NA   | NA          | 312136    | TCMID |
|    |     |           |                                          | hispidulin                                             | 30.97  | 0.27 | 1447-88-7   | 5281628   | TCMID |
|    |     |           |                                          | Hydroxycinnamic acid                                   | 43.29  | 0.04 | 7400-08-0   | 637542    | TCMID |
|    |     |           |                                          | inulicin                                               | NA     | NA   | NA          | NA        | TCMID |
|    |     |           |                                          | inulin                                                 | NA     | NA   | NA          | 44630352  | TCMID |
|    |     |           |                                          | inumakilactone e                                       | NA     | NA   | NA          | 5318451   | TCMID |
|    |     |           |                                          | isoramanone                                            | NA     | NA   | NA          | 5318637   | TCMID |
|    |     |           |                                          | kaempferol-3-arabofuranoside                           | NA     | NA   | NA          | NA        | TCMID |
|    |     |           |                                          | luteolin                                               | NA     | NA   | NA          | 25201972  | TCMID |
|    |     |           |                                          | luteolin 7-o-beta-d-galatoside                         | NA     | NA   | NA          | NA        | TCMID |
|    |     |           |                                          | o-coumaric acid-beta-d-glucoside                       | NA     | NA   | NA          | 9840292   | TCMID |
|    |     |           |                                          | paucin                                                 | NA     | NA   | NA          | 5198706   | TCMID |
|    |     |           |                                          | pratol                                                 | 20.04  | 0.21 | 487-24-1    | 5320693   | TCMID |
|    |     |           |                                          | protocatechuic acid-3-glucoside                        | 11.51  | 0.22 | NA          | 11972438  | TCMID |
|    |     |           |                                          | quercetin                                              | NA     | NA   | NA          | 46906036  | TCMID |
|    |     |           |                                          | quercetin-3-l-arabinon-7-d-glucoside                   | NA     | NA   | NA          | NA        | TCMID |
|    |     |           |                                          | quercetin-3-o-malonyl-beta-d-glucosid                  | NA     | NA   | NA          | 5320846   | TCMID |
|    |     |           |                                          | Salicylic acid                                         | NA     | NA   | NA          | 5371104   | TCMID |
|    |     |           |                                          | scopolin                                               | NA     | NA   | NA          | 11953803  | TCMID |
|    |     |           |                                          | spinacetin                                             | 11.22  | 0.38 | 3153-83-1   | 5321435   | TCMID |
|    |     |           |                                          | syronylglycerol-beta-syringaresinol                    | NA     | NA   | NA          | NA        | TCMID |
|    |     |           |                                          | taraxasterol                                           | NA     | NA   | NA          | 5270604   | TCMID |
|    |     |           |                                          | taraxasterol palmitate                                 | NA     | NA   | NA          | 92966441  | TCMID |
|    |     |           |                                          | taraxasteryl plmitate                                  | NA     | NA   | NA          | NA        | TCMID |
|    |     |           |                                          | taxifolin                                              | NA     | NA   | NA          | 57336522  | TCMID |
|    |     |           |                                          | Two hydrogen Sinapyl alcohol                           | NA     | NA   | NA          | NA        | TCMID |
|    |     |           |                                          | Vasopressin spinach                                    | NA     | NA   | NA          | NA        | TCMID |
|    |     |           |                                          | Zeeland flavonoids                                     | NA     | NA   | NA          | NA        | TCMID |
|    |     |           |                                          | Zeeland retinol hormone                                | NA     | NA   | NA          | NA        | TCMID |
| 10 | 大薊碱 | Dajitan   | <i>Cirsii Japonici Herba Carbonisata</i> | NA                                                     | NA     | NA   | NA          | NA        | NA    |
| 11 | 三颗针 | Sankezhen | <i>Berberidis Radix</i>                  | berbamine                                              | 27.61  | 0.11 | 478-61-5    | 275182    | CSDB  |
|    |     |           |                                          | palmatine                                              | 64.6   | 0.65 | 3486-67-7   | 19009     | CSDB  |
|    |     |           |                                          | isotetrandrine                                         | 10.42  | 0.1  | 477-57-6    | 457825    | CSDB  |
|    |     |           |                                          | jatrorrhizine                                          | 19.65  | 0.59 | 3621-38-3   | 72323     | CSDB  |
|    |     |           |                                          | berbamine                                              | NA     | NA   | NA          | 45356938  | TCMID |
|    |     |           |                                          | berberine                                              | NA     | NA   | NA          | 10246509  | TCMID |
|    |     |           |                                          | berberrubine                                           | NA     | NA   | NA          | 72704     | TCMID |
|    |     |           |                                          | columbamine                                            | 26.94  | 0.59 | 3621-36-1   | 72310     | TCMID |
|    |     |           |                                          | isotetrandrine                                         | NA     | NA   | NA          | 5351212   | TCMID |
|    |     |           |                                          | jatrorrhizine                                          | NA     | NA   | NA          | 5459338   | TCMID |
|    |     |           |                                          | julianine                                              | NA     | NA   | NA          | NA        | TCMID |
|    |     |           |                                          | magnoflorine                                           | NA     | NA   | NA          | 6451920   | TCMID |
|    |     |           |                                          | oxyacanthine                                           | NA     | NA   | NA          | 10031631  | TCMID |
|    |     |           |                                          | palmatine                                              | NA     | NA   | NA          | 200119    | TCMID |
| 12 | 杜仲  | Duzhong   | <i>Eucommiae Cortex</i>                  | 40957-99-1                                             | 57.2   | 0.62 | 40957-99-1  | 181681    | TCMSP |
|    |     |           |                                          | Mairin                                                 | 55.38  | 0.78 | 472-15-1    | 64971     | TCMSP |
|    |     |           |                                          | beta-sitosterol                                        | 36.91  | 0.75 | 83-46-5     | 222284    | TCMSP |
|    |     |           |                                          | kaempferol                                             | 41.88  | 0.24 | 520-18-3    | 5280863   | TCMSP |
|    |     |           |                                          | olivil                                                 | 62.23  | 0.41 | 2955-23-9   | NA        | TCMSP |
|    |     |           |                                          | Erythraline                                            | 49.18  | 0.55 | 466-77-3    | NA        | TCMSP |
|    |     |           |                                          | Acanthoside B                                          | 43.35  | 0.77 | 7374-79-0   | 443024    | TCMSP |
|    |     |           |                                          | AIDS214634                                             | 92.43  | 0.55 | NA          | 3010930   | TCMSP |
|    |     |           |                                          | 3-beta-Hydroxymethylenetanshiquinon                    | 32.16  | 0.41 | NA          | 5318290   | TCMSP |
|    |     |           |                                          | ent-Epicatechin                                        | 48.96  | 0.24 | 35323-91-2  | 182232    | TCMSP |
|    |     |           |                                          | Yangambin                                              | 57.53  | 0.81 | 13060-14-5  | 443028    | TCMSP |
|    |     |           |                                          | Eucommin A                                             | 30.51  | 0.85 | 99633-12-2  | 442836    | TCMSP |
|    |     |           |                                          | (+)-medioresinol                                       | 87.19  | 0.62 | 40957-99-1  | NA        | TCMSP |
|    |     |           |                                          | (-)-Tabernemontanine                                   | 58.67  | 0.61 | 2134-98-7   | NA        | TCMSP |
|    |     |           |                                          | Cyclopamine                                            | 55.42  | 0.82 | 4449-51-8   | 442972    | TCMSP |
|    |     |           |                                          | Dehydrodiconiferyl alcohol 4,gamma'-d                  | 51.44  | 0.4  | NA          | NA        | TCMSP |
|    |     |           |                                          | Dehydrodieugenol                                       | 30.1   | 0.24 | 4433-08-3   | 165225    | TCMSP |
|    |     |           |                                          | Cinchonan-9-al, 6'-methoxy-, (9R)-                     | 68.22  | 0.4  | 572-59-8    | 94175     | TCMSP |
|    |     |           |                                          | GBGB                                                   | 45.58  | 0.83 | 29307-60-6  | 3082301   | TCMSP |
|    |     |           |                                          | Helenalin                                              | 77.01  | 0.19 | 6754-13-8   | 23205     | TCMSP |
|    |     |           |                                          | (+)-Eudesmin                                           | 33.29  | 0.62 | 526-06-7    | 73117     | TCMSP |
|    |     |           |                                          | 4-[(2S,3R)-5-[(E)-3-hydroxyprop-1-en                   | 50.76  | 0.39 | 4263-87-0   | 11824478  | TCMSP |
|    |     |           |                                          | hirsutin qt                                            | 49.81  | 0.37 | 32221-58-2  | NA        | TCMSP |
|    |     |           |                                          | liriodendrin qt                                        | 53.14  | 0.8  | 573-44-4    | NA        | TCMSP |
|    |     |           |                                          | quercetin                                              | 46.43  | 0.28 | 117-39-5    | 5280343   | TCMSP |
|    |     |           |                                          | beta-carotene                                          | 37.18  | 0.58 | 31797-85-0  | 5280489   | TCMSP |
|    |     |           |                                          | (E)-3-[4-[(1R,2R)-2-hydroxy-2-(4-hyd                   | 56.32  | 0.36 | NA          | 21582571  | TCMSP |
|    |     |           |                                          | Syringetin                                             | 36.82  | 0.37 | 4423-37-4   | 5281953   | TCMSP |
|    |     |           |                                          | dihydrodehydrodiconiferyl alcohol                      | 9.68   | 0.39 | 133318-48-6 | 5274623   | CSDB  |
|    |     |           |                                          | dihydroxydehydrodiconiferyl alcohol                    | NA     | NA   | NA          | 5317204   | CSDB  |
|    |     |           |                                          | syringylglycerol-beta-syringaresinol ether             | NA     | NA   | NA          | NA        | CSDB  |
|    |     |           |                                          | syringaresinol                                         | 3.29   | 0.72 | 21453-69-0  | 443023    | CSDB  |
|    |     |           |                                          | syringaresinol mono-beta-D-glucoside                   | 43.35  | 0.77 | 7374-79-0   | 443024    | CSDB  |
|    |     |           |                                          | kaempferol                                             | 41.88  | 0.24 | 520-18-3    | 5280863   | CSDB  |

|    |     |            |                                 |                                                            |       |      |             |           |       |
|----|-----|------------|---------------------------------|------------------------------------------------------------|-------|------|-------------|-----------|-------|
|    |     |            |                                 | Nonacosane                                                 | 8.12  | 0.39 | 630-03-5    | 12409     | CSDB  |
|    |     |            |                                 | n-triacontanol                                             | 10.46 | 0.45 | 593-50-0    | 68972     | CSDB  |
|    |     |            |                                 | thea alcohol A                                             | NA    | NA   | 178823-24-0 | NA        | CSDB  |
|    |     |            |                                 | dehydrodiconiferylalcohol-4,γ'-di-O-β-D-                   | NA    | NA   | NA          | NA        | CSDB  |
|    |     |            |                                 | methionine                                                 | NA    | NA   | 59-51-8     | 876       | CSDB  |
|    |     |            |                                 | betulinic acid                                             | 55.38 | 0.78 | 472-15-1    | 64971     | CSDB  |
|    |     |            |                                 | betulin                                                    | 15.48 | 0.78 | 473-98-3    | 72326     | CSDB  |
|    |     |            |                                 | galactitol                                                 | 10.69 | 0.03 | 608-66-2    | 11850     | CSDB  |
|    |     |            |                                 | hedytol C-4',4"-di-O-β-D-glucopyranose                     | NA    | NA   | 107668-75-7 | NA        | CSDB  |
|    |     |            |                                 | tryptophane                                                | NA    | NA   | 3184-71-5   | 6305      | CSDB  |
|    |     |            |                                 | isoleucine                                                 | NA    | NA   | 7004-9-3    | 791       | CSDB  |
|    |     |            |                                 | β-sitosterol-3-O-β-D-glucopyranoside                       | 20.63 | 0.62 | 474-58-8    | 5742590   | CSDB  |
|    |     |            |                                 | threonine                                                  | NA    | NA   | 72-19-5     | 6288      | CSDB  |
|    |     |            |                                 | ulmoside                                                   | NA    | NA   | 67708-72-9  | NA        | CSDB  |
|    |     |            |                                 | medioresinol                                               | 57.2  | 0.62 | 40957-99-1  | 181681    | CSDB  |
|    |     |            |                                 | medioresinol-di-O-β-D-glucopyranoside                      | NA    | NA   | NA          | NA        | CSDB  |
|    |     |            |                                 | medioresinol-4'-O-β-D-glucopyranoside                      | 30.51 | 0.85 | 99633-12-2  | 442836    | CSDB  |
|    |     |            |                                 | ulmoprenol                                                 | NA    | NA   | 70475-06-8  | NA        | CSDB  |
|    |     |            |                                 | eucommiol                                                  | 40.17 | 0.05 | 55930-44-4  | 154373    | CSDB  |
|    |     |            |                                 | glutamic acid                                              | NA    | NA   | 6899-5-4    | 611       | CSDB  |
|    |     |            |                                 | cycloolivil                                                | 24.5  | 0.42 | NA          | 5316262   | CSDB  |
|    |     |            |                                 | epipinoresinol                                             | NA    | NA   | 24404-50-0  | 637584    | CSDB  |
|    |     |            |                                 | phenylalanine                                              | NA    | NA   | 63-91-2     | 6140      | CSDB  |
|    |     |            |                                 | pinoresinol                                                | 4.25  | 0.52 | NA          | 73399     | CSDB  |
|    |     |            |                                 | pinoresinol diglucoside                                    | NA    | NA   | 153061-63-3 | 174003    | CSDB  |
|    |     |            |                                 | pinoresinol monoglycoside                                  | NA    | NA   | 6991-51-3   | NA        | CSDB  |
|    |     |            |                                 | chlorogenic acid                                           | 11.93 | 0.33 | 327-97-9    | 1794427   | CSDB  |
|    |     |            |                                 | caffeic acid                                               | 25.76 | 0.05 | 331-39-5    | 689043    | CSDB  |
|    |     |            |                                 | histidine                                                  | NA    | NA   | 71-00-1     | 6274      | CSDB  |
|    |     |            |                                 | citrusin B                                                 | NA    | NA   | 105279-10-5 | 11972318  | CSDB  |
|    |     |            |                                 | harpagide acetate                                          | 12.39 | 0.48 | 6926-14-3   | 9978650   | CSDB  |
|    |     |            |                                 | vanillic acid                                              | 35.47 | 0.04 | 121-34-6    | 8468      | CSDB  |
|    |     |            |                                 | reptoside                                                  | 4.29  | 0.44 | 53839-03-5  | 44584096  | CSDB  |
|    |     |            |                                 | leucine                                                    | NA    | NA   | 61-90-5     | 6106      | CSDB  |
|    |     |            |                                 | geniposide                                                 | 14.64 | 0.44 | 24512-63-8  | 107848    | CSDB  |
|    |     |            |                                 | geniposidic acid                                           | 19.59 | 0.41 | 27741-01-1  | 443354    | CSDB  |
|    |     |            |                                 | genipin                                                    | 26.06 | 0.1  | 6902-77-8   | 442424    | CSDB  |
|    |     |            |                                 | aucuboside                                                 | 4.17  | 0.33 | 479-98-1    | 91458     | CSDB  |
|    |     |            |                                 | cystine                                                    | NA    | NA   | 56-89-3     | 67678     | CSDB  |
|    |     |            |                                 | tartaric acid                                              | NA    | NA   | NA          | 875       | CSDB  |
|    |     |            |                                 | 1-hydroxypinoresinol                                       | 92.43 | 0.55 | 81426-17-7  | 3010930   | CSDB  |
|    |     |            |                                 | 1-hydroxypinoresinol-4',4'-di-O-β-D-glucopyranoside        | NA    | NA   | NA          | NA        | CSDB  |
|    |     |            |                                 | 1-hydroxypinoresinol-4'-O-β-D-glucopyranoside              | NA    | NA   | 102582-69-4 | NA        | CSDB  |
|    |     |            |                                 | 5'-caffeoylquinic acid                                     | 19.61 | 0.33 | 906-33-2    | 5280633   | CSDB  |
|    |     |            |                                 | methyl chlorogenate                                        | 9.97  | 0.36 | NA          | 6476139   | CSDB  |
|    |     |            |                                 | liriodendrin                                               | NA    | NA   | 573-44-4    | 21603207  | CSDB  |
|    |     |            |                                 | ajugoside                                                  | NA    | NA   | 52916-96-8  | NA        | CSDB  |
|    |     |            |                                 | lysine                                                     | 29.33 | 0.02 | 56-87-1     | 5962      | CSDB  |
|    |     |            |                                 | guaiaacyl glycerol                                         | NA    | NA   | 1208-42-0   | 14579     | CSDB  |
|    |     |            |                                 | guaiaacyl glycerol-β-coniferyl aldehyde                    | NA    | NA   | 119420-37-0 | 101420745 | CSDB  |
|    |     |            |                                 | ursolic acid                                               | 16.77 | 0.75 | 77-52-1     | 64945     | CSDB  |
|    |     |            |                                 | olivil                                                     | 7.38  | 0.41 | 2955-23-9   | 5273570   | CSDB  |
|    |     |            |                                 | olivil-4',4'-di-O-β-D-glucopyranoside                      | NA    | NA   | NA          | NA        | CSDB  |
|    |     |            |                                 | olivil-4'-O-β-D-glucopyranoside                            | NA    | NA   | 56440-73-4  | NA        | CSDB  |
|    |     |            |                                 | olivil-4'-O-β-D-glucopyranoside                            | 25.44 | 0.81 | 76880-93-8  | 14033815  | CSDB  |
|    |     |            |                                 | valine                                                     | NA    | NA   | 72-18-4     | 6287      | CSDB  |
|    |     |            |                                 | aucubigenin-1-β-isomaltoside                               | NA    | NA   | NA          | NA        | CSDB  |
|    |     |            |                                 | guttapercha                                                | NA    | NA   | NA          | NA        | CSDB  |
|    |     |            |                                 | (+)-1-hydroxypinoresinol-4&#39;&#39;-o-β-D-glucopyranoside | NA    | NA   | NA          | 5318329   | TCMID |
|    |     |            |                                 | (+)-1-hydroxypinoresinol-4&#39;&#39;-o-β-D-glucopyranoside | 6.99  | 0.33 | NA          | 21633110  | TCMID |
|    |     |            |                                 | (+)-1-hydroxypinoresinol-4&#39;&#39;-o-β-D-glucopyranoside | 28.95 | 0.86 | NA          | 21591950  | TCMID |
|    |     |            |                                 | (+)-pinoresinol                                            | 4.25  | 0.52 | NA          | 73399     | TCMID |
|    |     |            |                                 | (+)-cycloolivil                                            | 24.5  | 0.42 | NA          | 5316262   | TCMID |
|    |     |            |                                 | (+)-eudesma-4(14),7(1)-dien-8-one                          | NA    | NA   | NA          | 101351161 | TCMID |
|    |     |            |                                 | (+)-medioresinol                                           | 57.2  | 0.62 | 40957-99-1  | 181681    | TCMID |
|    |     |            |                                 | (+)-medioresinol di-o-beta-d-glucopyranoside               | NA    | NA   | NA          | 5319325   | TCMID |
|    |     |            |                                 | (+)-medioresinol di-o-beta-d-glucopyranoside               | NA    | NA   | NA          | NA        | TCMID |
|    |     |            |                                 | (+)-pinoresinol-di-o-beta-d-glucoside                      | NA    | NA   | NA          | 102277948 | TCMID |
|    |     |            |                                 | (+)-pinoresinol-di-o-beta-d-glucoside                      | NA    | NA   | NA          | NA        | TCMID |
|    |     |            |                                 | (+)-pinoresinol-β-d-glucopyranoside                        | 25.56 | 0.89 | NA          | 11168362  | TCMID |
|    |     |            |                                 | (+)-threo-guaiaacylglycerol                                | NA    | NA   | NA          | 11063784  | TCMID |
|    |     |            |                                 | (-)-olivil 4&#39;&#39;-o-beta-d-glucopyranoside            | 24.59 | 0.82 | NA          | 14033813  | TCMID |
|    |     |            |                                 | (-)-olivil 4&#39;&#39;-o-beta-d-glucopyranoside            | 6.94  | 0.47 | NA          | 21633108  | TCMID |
|    |     |            |                                 | (?)-olivil                                                 | 7.38  | 0.41 | 2955-23-9   | 5273570   | TCMID |
|    |     |            |                                 | (?)-olivil-4&#39;&#39;-o-beta-d-glucopyranoside            | NA    | NA   | NA          | 102420645 | TCMID |
|    |     |            |                                 | 1-deoxyeucommiol                                           | NA    | NA   | NA          | 5316559   | TCMID |
|    |     |            |                                 | 11-deoxyglycyrrhetic acid                                  | 16.21 | 0.76 | 564-16-9    | 12305517  | TCMID |
|    |     |            |                                 | 16-triacontanol                                            | 11.19 | 0.49 | NA          | 5322011   | TCMID |
|    |     |            |                                 | 3-beta-hydroxymethylenetanshiquinone                       | NA    | NA   | NA          | NA        | TCMID |
|    |     |            |                                 | 3-hydroxyproline                                           | NA    | NA   | NA          | 11137200  | TCMID |
|    |     |            |                                 | 5-hydroxymethyl furfuraldehyde                             | NA    | NA   | NA          | NA        | TCMID |
|    |     |            |                                 | 6,6&#39;&#39;-dimethoxygossypol                            | 8.93  | 0.86 | NA          | 5316861   | TCMID |
|    |     |            |                                 | acanthoside b                                              | NA    | NA   | NA          | 44145386  | TCMID |
|    |     |            |                                 | Ajuga glycosides                                           | NA    | NA   | NA          | NA        | TCMID |
|    |     |            |                                 | ajugoside                                                  | NA    | NA   | NA          | 23304363  | TCMID |
|    |     |            |                                 | aucubin                                                    | NA    | NA   | NA          | 45358109  | TCMID |
|    |     |            |                                 | Aucubin A glycosides                                       | NA    | NA   | NA          | NA        | TCMID |
|    |     |            |                                 | betulin                                                    | NA    | NA   | NA          | 51340201  | TCMID |
|    |     |            |                                 | caffeic acid dimethyl ether                                | 63.86 | 0.07 | 2316-26-9   | 1585026   | TCMID |
|    |     |            |                                 | caffeic acid                                               | 54.97 | 0.05 | 331-39-5    | 1549111   | TCMID |
|    |     |            |                                 | Chlorogenic acid, p-cresol                                 | NA    | NA   | NA          | NA        | TCMID |
|    |     |            |                                 | chlorogenic acid                                           | 11.93 | 0.33 | 327-97-9    | 1794427   | TCMID |
|    |     |            |                                 | chlorogenin                                                | NA    | NA   | NA          | 52931478  | TCMID |
|    |     |            |                                 | Citrus prime B                                             | NA    | NA   | NA          | NA        | TCMID |
|    |     |            |                                 | citrusin b                                                 | NA    | NA   | NA          | 11972318  | TCMID |
|    |     |            |                                 | civetone                                                   | NA    | NA   | NA          | 11334208  | TCMID |
|    |     |            |                                 | Cloves sour grapes glycoside                               | NA    | NA   | NA          | NA        | TCMID |
|    |     |            |                                 | coniferin                                                  | NA    | NA   | NA          | 11602622  | TCMID |
|    |     |            |                                 | coniferyl aldehyde                                         | 49.26 | 0.05 | 458-36-6    | 5280536   | TCMID |
| 13 | 莲房  | Lianfang   | Nelumbinis Receptaculum         | quercetin                                                  | 46.43 | 0.28 | 117-39-5    | 5280343   | TCMSP |
|    |     |            |                                 | guercetol                                                  | 46.43 | 0.28 | 117-39-5    | 5280343   | CSDB  |
|    |     |            |                                 | hyperoside                                                 | 6.94  | 0.77 | 482-36-0    | 5281643   | CSDB  |
|    |     |            |                                 | nelumbine                                                  | NA    | NA   | NA          | NA        | CSDB  |
|    |     |            |                                 | anonaine                                                   | NA    | NA   | NA          | 3462225   | TCMID |
|    |     |            |                                 | higenamine                                                 | 82.54 | 0.21 | 106032-53-5 | 440988    | TCMID |
|    |     |            |                                 | isoliensinine                                              | NA    | NA   | NA          | 10100278  | TCMID |
|    |     |            |                                 | liensinine                                                 | NA    | NA   | NA          | 11621414  | TCMID |
|    |     |            |                                 | neferine                                                   | NA    | NA   | NA          | 398793    | TCMID |
| 14 | 硫磺  | Liuhuang   | Sulfur                          | As                                                         | NA    | NA   | NA          | 49773122  | TCMID |
|    |     |            |                                 | Se                                                         | NA    | NA   | NA          | 6326970   | TCMID |
|    |     |            |                                 | sulfur                                                     | NA    | NA   | NA          | 5460602   | TCMID |
|    |     |            |                                 | Te                                                         | NA    | NA   | NA          | 6474657   | TCMID |
| 15 | 荆芥炭 | Jingjietan | Schizonepetae Herba Carbonisata | NA                                                         | NA    | NA   | NA          | NA        | NA    |

|    |     |           |                       |                                        |       |      |            |         |       |
|----|-----|-----------|-----------------------|----------------------------------------|-------|------|------------|---------|-------|
| 16 | 谷精草 | Gujingcao | <i>Eriocauli Flos</i> | Dinatin                                | 30.97 | 0.27 | 1447-88-7  | 5281628 | TCMSP |
|    |     |           |                       | Toralactone                            | 46.46 | 0.24 | 41743-74-2 | 5321980 | TCMSP |
|    |     |           |                       | quercetagetin                          | 45.01 | 0.31 | 90-18-6    | 5281680 | TCMSP |
|    |     |           |                       | Patuletin                              | 53.11 | 0.34 | 519-96-0   | 5281678 | TCMSP |
|    |     |           |                       | 2-Benzof[1,3]dioxol-5-yl-5,7-dimethoxy | 57.68 | 0.38 | NA         | 636811  | TCMSP |
|    |     |           |                       | 1,3,6-trihydroxy-2,5,7-trimethoxyxanth | 42.22 | 0.38 | NA         | NA      | TCMSP |
|    |     |           |                       | 7,30-dihydroxy-5,40,50-trimethoxyiso   | 47.33 | 0.37 | NA         | NA      | TCMSP |
|    |     |           |                       | quercetin                              | 46.43 | 0.28 | 117-39-5   | 5280343 | TCMSP |
|    |     |           |                       | (2s)-3,4-methylenedioxy-5              | 57.68 | 0.38 | NA         | 636811  | TCMID |
|    |     |           |                       | caffetannic acid                       | 11.93 | 0.33 | 327-97-9   | 1794427 | TCMID |
|    |     |           |                       | hispidulin 7-(6-e-p-coumaroyl-β-d-gluc | NA    | NA   | NA         | 6325343 | TCMID |

Tab. S5 Chemical information of active ingredients in herbs suppressing the IL-6 and TNF- $\alpha$  pathways.

| No.                                             | Herb Chinese Name | Herb Pinyin Name | Herb                               | Molecule Name                                                                  | OB (%) | DL         | CAS                     | Pubchem CID                                   | Database |
|-------------------------------------------------|-------------------|------------------|------------------------------------|--------------------------------------------------------------------------------|--------|------------|-------------------------|-----------------------------------------------|----------|
| 1                                               | 委陵菜               | Weilingcai       | <i>Potentillae Chinensis Herba</i> | ellagic acid                                                                   | 43.06  | 0.43       | 476-66-4                | NA                                            | TCMSP    |
|                                                 |                   |                  |                                    | Mairin                                                                         | 55.38  | 0.78       | 472-15-1                | 64971                                         | TCMSP    |
|                                                 |                   |                  |                                    | isorhamnetin                                                                   | 49.6   | 0.31       | 480-19-3                | 5281654                                       | TCMSP    |
|                                                 |                   |                  |                                    | beta-sitosterol                                                                | 36.91  | 0.75       | 83-46-5                 | 222284                                        | TCMSP    |
|                                                 |                   |                  |                                    | kaempferol                                                                     | 41.88  | 0.24       | 520-18-3                | 5280863                                       | TCMSP    |
|                                                 |                   |                  |                                    | quercetin                                                                      | 46.43  | 0.28       | 73123-10-1              | 5280343                                       | TCMSP    |
|                                                 |                   |                  |                                    | 3,3',4-tri-O-methylgallate                                                     | NA     | NA         | 5145-53-9               | 5281860                                       | CSDB     |
|                                                 |                   |                  |                                    | quercetin                                                                      | 46.43  | 0.28       | 117-39-5                | 5280343                                       | CSDB     |
|                                                 |                   |                  |                                    | kaempferide                                                                    | 73.41  | 0.27       | 491-54-3                | 5281666                                       | CSDB     |
|                                                 |                   |                  |                                    | azelaic acid                                                                   | NA     | NA         | 123-99-9                | 2266                                          | CSDB     |
|                                                 |                   |                  |                                    | gallic acid                                                                    | 31.69  | 0.04       | 149-91-7                | 370                                           | CSDB     |
|                                                 |                   |                  |                                    | aplotaxene                                                                     | 44.06  | 0.08       | 10482-53-8              | 5352710                                       | TCMID    |
|                                                 |                   |                  |                                    | gallicacid                                                                     | NA     | NA         | NA                      | 370                                           | TCMID    |
|                                                 |                   |                  |                                    | kaempferol                                                                     | NA     | NA         | NA                      | 2520262                                       | TCMID    |
|                                                 |                   |                  |                                    | pectolarin                                                                     | NA     | NA         | NA                      | 6708644                                       | TCMID    |
|                                                 |                   |                  |                                    | quercetin                                                                      | NA     | NA         | NA                      | 46906036                                      | TCMID    |
|                                                 |                   |                  |                                    | ursolicacid                                                                    | NA     | NA         | NA                      | 45358157                                      | TCMID    |
|                                                 |                   |                  |                                    | $\alpha$ -myrin                                                                | NA     | NA         | NA                      | 225688                                        | TCMID    |
|                                                 |                   |                  |                                    | $\beta$ -myrin                                                                 | NA     | NA         | NA                      | 225689                                        | TCMID    |
|                                                 |                   |                  |                                    | 2                                                                              | 禹州漏芦   | Yuzhoululu | <i>Echinopsis Radix</i> | 5-(3-hydroxy-4-isoacetoxybutyn-1)-bithiophene | 42.46    |
| Hesperetin                                      | 70.31             | 0.27             | 520-33-2                           |                                                                                |        |            |                         | 72281                                         | TCMSP    |
| beta-sitosterol                                 | 36.91             | 0.75             | 83-46-5                            |                                                                                |        |            |                         | 222284                                        | TCMSP    |
| luteolin                                        | 36.16             | 0.25             | 491-70-3                           |                                                                                |        |            |                         | 5280445                                       | TCMSP    |
| quercetin                                       | 46.43             | 0.28             | 73123-10-1                         |                                                                                |        |            |                         | 5280343                                       | TCMSP    |
| taraxerol acetate                               | 9.59              | 0.74             | 2189-80-2                          |                                                                                |        |            |                         | 94225                                         | CSDB     |
| limonene                                        | NA                | NA               | 7705-14-8                          |                                                                                |        |            |                         | 22311                                         | CSDB     |
| $\beta$ -caryophyllene                          | 29.7              | 0.09             | 87-44-5                            |                                                                                |        |            |                         | 5281515                                       | CSDB     |
| caryophellene                                   | NA                | NA               | NA                                 |                                                                                |        |            |                         | NA                                            | CSDB     |
| caryophyllene oxide                             | NA                | NA               | 17627-43-9                         |                                                                                |        |            |                         | 14350                                         | CSDB     |
| 9,12-octadecadienoic acid                       | NA                | NA               | 2197-37-7                          |                                                                                |        |            |                         | 3931                                          | CSDB     |
| methyl 9-octadecenoate                          | 16.8              | 0.16             | 112-61-8                           |                                                                                |        |            |                         | 8201                                          | CSDB     |
| hexadecanoic acid                               | 19.3              | 0.1              | 57-10-3                            |                                                                                |        |            |                         | 985                                           | CSDB     |
| triacontanoic acid                              | 13.22             | 0.49             | 506-50-3                           |                                                                                |        |            |                         | 10471                                         | CSDB     |
| $\alpha$ -terthienyl                            | 19.56             | 0.07             | 1081-34-1                          |                                                                                |        |            |                         | 65067                                         | CSDB     |
| costic acid                                     | 30.83             | 0.11             | 3650-43-9                          |                                                                                |        |            |                         | 6451579                                       | CSDB     |
| $\delta$ -guaiene                               | 23.66             | 0.07             | 3691-11-0                          |                                                                                |        |            |                         | 94275                                         | CSDB     |
| ilicic acid                                     | NA                | NA               | 4586-68-9                          |                                                                                |        |            |                         | 6452036                                       | CSDB     |
| isocardopatine                                  | NA                | NA               | 70607-88-4                         |                                                                                |        |            |                         | 76330007                                      | CSDB     |
| isomenthone                                     | 61.2              | 0.03             | 1196-31-2                          |                                                                                |        |            |                         | 70962                                         | CSDB     |
| daucosterol                                     | 20.63             | 0.62             | 474-58-8                           |                                                                                |        |            |                         | 5742590                                       | CSDB     |
| eleutheroside A                                 | 20.63             | 0.62             | 474-58-8                           |                                                                                |        |            |                         | 5742590                                       | CSDB     |
| alexandrin                                      | 20.63             | 0.62             | 474-58-8                           |                                                                                |        |            |                         | 5742590                                       | CSDB     |
| dibutyl phthalate                               | 64.54             | 0.13             | 84-74-2                            |                                                                                |        |            |                         | 3026                                          | CSDB     |
| epi- $\beta$ -santalene                         | NA                | NA               | NA                                 |                                                                                |        |            |                         | NA                                            | CSDB     |
| $\beta$ -farnesene                              | 17.42             | 0.05             | 18794-84-8                         |                                                                                |        |            |                         | 5281517                                       | CSDB     |
| pulegone                                        | NA                | NA               | 15932-80-6                         |                                                                                |        |            |                         | 6988                                          | CSDB     |
| $\alpha$ -bergamotene                           | 18.43             | 0.09             | 13474-59-4                         |                                                                                |        |            |                         | 6429302                                       | CSDB     |
| $\alpha$ -myrin                                 | NA                | NA               | 638-95-9                           |                                                                                |        |            |                         | 73170                                         | CSDB     |
| $\alpha$ -myrin acetate                         | NA                | NA               | NA                                 |                                                                                |        |            |                         | 92842                                         | CSDB     |
| humulene                                        | 22.98             | 0.06             | 6753-98-6                          |                                                                                |        |            |                         | 5281520                                       | CSDB     |
| echimine                                        | NA                | NA               | NA                                 |                                                                                |        |            |                         | 101710312                                     | CSDB     |
| echinopsine                                     | NA                | NA               | 83-54-5                            |                                                                                |        |            |                         | 6748                                          | CSDB     |
| echinorine                                      | NA                | NA               | 18095-64-2                         |                                                                                |        |            |                         | 442898                                        | CSDB     |
| ursolic acid                                    | 16.77             | 0.75             | 77-52-1                            |                                                                                |        |            |                         | 64945                                         | CSDB     |
| menthone                                        | 57.9              | 0.03             | 3391-87-5                          |                                                                                |        |            |                         | 443159                                        | CSDB     |
| $\alpha$ -santalene                             | NA                | NA               | 512-61-8                           |                                                                                |        |            |                         | 94164                                         | CSDB     |
| $\beta$ -santalene                              | 17.12             | 0.07             | 511-59-1                           |                                                                                |        |            |                         | 10889018                                      | CSDB     |
| $\alpha$ -myrin                                 | 10.28             | 0.76             | 638-95-9                           |                                                                                |        |            |                         | 73170                                         | CSDB     |
| $\beta$ -bulnesene                              | NA                | NA               | 3772-93-8                          |                                                                                |        |            |                         | 12302132                                      | CSDB     |
| 5-(3,4-dihydroxybutyn-1-yl)-2,2'-bithiophene    | NA                | NA               | 1211-45-6                          |                                                                                |        |            |                         | 14186845                                      | CSDB     |
| 5-(3-buten-1-ynyl)bithiophene                   | 57.29             | 0.06             | 1134-61-8                          |                                                                                |        |            |                         | 70813                                         | CSDB     |
| methyl 9,10-octadecadienoate                    | NA                | NA               | NA                                 |                                                                                |        |            |                         | 91694355                                      | CSDB     |
| 6,10,14-trimethyl-2-pentadecene                 | NA                | NA               | NA                                 |                                                                                |        |            |                         | NA                                            | CSDB     |
| cardopatine                                     | NA                | NA               | NA                                 |                                                                                |        |            |                         | 76308304                                      | CSDB     |
| 5-(4-O-isopentanoylbutyn-1-yl)-2,2'-bithiophene | NA                | NA               | NA                                 |                                                                                |        |            |                         | NA                                            | CSDB     |
| benzo(1,2:5,4)bithiophene                       | NA                | NA               | NA                                 |                                                                                |        |            |                         | NA                                            | CSDB     |
| echinopsidine                                   | NA                | NA               | NA                                 |                                                                                |        |            |                         | 161462                                        | CSDB     |
| echinoramine                                    | NA                | NA               | NA                                 |                                                                                |        |            |                         | NA                                            | CSDB     |
| echinopsine                                     | NA                | NA               | NA                                 |                                                                                |        |            |                         | 24189640                                      | TCMID    |
| 3                                               | 西洋参               | Xiyangshen       | <i>Panaxis Quinquefolii Radix</i>  | (2R,3S,4S,5R,6R)-2-(hydroxymethyl)-6-[[3S,5R,8R]polyacetylene PQ-2             | 36.43  | 0.25       | 62025-49-4              | 9918692                                       | TCMSP    |
|                                                 |                   |                  |                                    | PQ-2                                                                           | 36.74  | 0.2        | NA                      | NA                                            | TCMSP    |
|                                                 |                   |                  |                                    | PQ-2                                                                           | 36.74  | 0.19       | NA                      | NA                                            | TCMSP    |
|                                                 |                   |                  |                                    | (8S,9S,10R,13R,14S,17R)-17-[(1R,4R)-4-ethyl-1,5-dioxane-2-yl]hexadecanoylgenol | 43.87  | 0.75       | 2034-72-2               | 12444466                                      | TCMSP    |
|                                                 |                   |                  |                                    | 20-Hexadecanoylgenol                                                           | 32.7   | 0.65       | NA                      | NA                                            | TCMSP    |
|                                                 |                   |                  |                                    | beta-sitosterol                                                                | 36.91  | 0.75       | 83-46-5                 | 222284                                        | TCMSP    |
|                                                 |                   |                  |                                    | ginsenoside rh2                                                                | 36.32  | 0.56       | 78214-33-2              | 119307                                        | TCMSP    |
|                                                 |                   |                  |                                    | stigmast-7-enol                                                                | 37.42  | 0.75       | 481-19-6                | 12315384                                      | TCMSP    |
|                                                 |                   |                  |                                    | papaverine                                                                     | 64.04  | 0.38       | 58-74-2                 | 4680                                          | TCMSP    |
|                                                 |                   |                  |                                    | daucosterol qt                                                                 | 36.91  | 0.75       | 474-58-8                | NA                                            | TCMSP    |
|                                                 |                   |                  |                                    | Daturilin                                                                      | 50.37  | 0.77       | 111950-78-8             | NA                                            | TCMSP    |
|                                                 |                   |                  |                                    | 3-cyclohexyldodecane                                                           | NA     | NA         | 13151-83-2              | 524423                                        | CSDB     |
|                                                 |                   |                  |                                    | 2,6-bis(1,1-dimethylethyl)-4-methylphenol                                      | 66.46  | 0.05       | 25013-16-5              | 8456                                          | CSDB     |
|                                                 |                   |                  |                                    | $\beta$ -caryophyllene                                                         | 29.7   | 0.09       | 87-44-5                 | 5281515                                       | CSDB     |
|                                                 |                   |                  |                                    | caryophellene                                                                  | NA     | NA         | NA                      | NA                                            | CSDB     |
|                                                 |                   |                  |                                    | undecane                                                                       | 17.15  | 0.02       | 1120-21-4               | 14257                                         | CSDB     |
|                                                 |                   |                  |                                    | dodecane                                                                       | 17.74  | 0.02       | 112-40-3                | 8182                                          | CSDB     |
|                                                 |                   |                  |                                    | heptadeca-1,8-dien-4,6-diyne-3,10-diol                                         | NA     | NA         | 63910-76-9              | 5318010                                       | CSDB     |
|                                                 |                   |                  |                                    | 9,12,15-octadecatrienoic acid                                                  | NA     | NA         | 1955-33-5               | 860                                           | CSDB     |
|                                                 |                   |                  |                                    | hexadecane                                                                     | 12.32  | 0.06       | 544-76-3                | 11006                                         | CSDB     |
|                                                 |                   |                  |                                    | panose A                                                                       | NA     | NA         | NA                      | NA                                            | CSDB     |
|                                                 |                   |                  |                                    | ginsenoside- F2                                                                | 36.43  | 0.25       | 62025-49-4              | 9918692                                       | CSDB     |
|                                                 |                   |                  |                                    | ginsenoside- F3                                                                | NA     | NA         | 62025-50-7              | 46887678                                      | CSDB     |
|                                                 |                   |                  |                                    | ginsenoside Ra0                                                                | NA     | NA         | 112722-00-6             | 102601548                                     | CSDB     |
|                                                 |                   |                  |                                    | ginsenoside- Rb1                                                               | 6.43   | 0.04       | 41753-43-9              | 9898279                                       | CSDB     |
|                                                 |                   |                  |                                    | ginsenoside- Rb2                                                               | 6.43   | 0.04       | 41753-43-9              | 9898279                                       | CSDB     |
|                                                 |                   |                  |                                    | ginsenoside- Rb3                                                               | 6.02   | 0.04       | 11021-13-9              | 6917976                                       | CSDB     |
|                                                 |                   |                  |                                    | ginsenoside- Rc                                                                | NA     | NA         | 68406-26-8              | 77906406                                      | CSDB     |
|                                                 |                   |                  |                                    | ginsenoside- Rd                                                                | NA     | NA         | 11021-14-0              | 12855889                                      | CSDB     |
|                                                 |                   |                  |                                    | ginsenoside- Re                                                                | NA     | NA         | 52705-93-8              | 12855925                                      | CSDB     |
|                                                 |                   |                  |                                    | ginsenoside- Rf                                                                | NA     | NA         | 52705-93-8              | 12855925                                      | CSDB     |
|                                                 |                   |                  |                                    | ginsenoside- Rg1                                                               | 4.27   | 0.12       | 52286-59-6              | 441921                                        | CSDB     |
|                                                 |                   |                  |                                    | ginsenoside- Rg2                                                               | 17.74  | 0.24       | 52286-58-5              | 441922                                        | CSDB     |
|                                                 |                   |                  |                                    | ginsenoside- Rg3                                                               | 10.04  | 0.28       | 22427-39-0              | 441923                                        | CSDB     |
|                                                 |                   |                  |                                    | ginsenoside- Rh1                                                               | 10.09  | 0.26       | 52286-74-5              | 21599924                                      | CSDB     |
|                                                 |                   |                  |                                    | ginsenoside- Rh2                                                               | NA     | NA         | 14197-60-5              | 9918693                                       | CSDB     |
|                                                 |                   |                  |                                    | ginsenoside- Rh3                                                               | 16.91  | 0.57       | 63223-86-9              | 12855920                                      | CSDB     |
|                                                 |                   |                  |                                    | ginsenoside- Rh4                                                               | 36.32  | 0.56       | 60431-52-9              | 119307                                        | CSDB     |
|                                                 |                   |                  |                                    | ginsenoside- Ro                                                                | 1.95   | 0.05       | 34367-04-9              | 11815492                                      | CSDB     |
|                                                 |                   |                  |                                    | chikusetsu saponin V                                                           | 1.95   | 0.05       | 34367-04-9              | 11815492                                      | CSDB     |
|                                                 |                   |                  |                                    | panaxydol                                                                      | 61.67  | 0.13       | 72800-72-7              | 126312                                        | CSDB     |
|                                                 |                   |                  |                                    | panaxytriol                                                                    | NA     | NA         | 87005-03-6              | 93484                                         | CSDB     |
|                                                 |                   |                  |                                    | panaxylinol                                                                    | 43.31  | 0.1        | 81203-57-8              | 5469789                                       | CSDB     |
|                                                 |                   |                  |                                    | sorbose                                                                        | 1.55   | 0.03       | 87-79-6                 | 6904                                          | CSDB     |
|                                                 |                   |                  |                                    | caproic acid                                                                   | 73.08  | 0.01       | 142-62-1                | 8892                                          | CSDB     |



|  |  |  |                                                      |       |      |            |           |       |
|--|--|--|------------------------------------------------------|-------|------|------------|-----------|-------|
|  |  |  | aspartate                                            | NA    | NA   | 6899-03-2  | 5960      | CSDB  |
|  |  |  | pelargonic acid                                      | 40.51 | 0.02 | 112-05-0   | 8158      | CSDB  |
|  |  |  | longifolene                                          | NA    | NA   | 475-20-7   | 1796220   | CSDB  |
|  |  |  | n-heptadecanoic acid                                 | 18.51 | 0.12 | 506-12-7   | 10465     | CSDB  |
|  |  |  | n-octadecanoic acid                                  | 17.83 | 0.14 | 57-11-4    | 5281      | CSDB  |
|  |  |  | glycine                                              | NA    | NA   | 56-40-6    | 750       | CSDB  |
|  |  |  | $\beta$ -gurjunene                                   | NA    | NA   | 17334-55-3 | 28481     | CSDB  |
|  |  |  | malonyl-ginsenoside Rb1                              | NA    | NA   | NA         | NA        | CSDB  |
|  |  |  | alanine                                              | NA    | NA   | 56-41-7    | 5950      | CSDB  |
|  |  |  | 2-methoxy-4-(1-propenyl)phenol                       | 70.1  | 0.04 | 97-54-1    | 853433    | CSDB  |
|  |  |  | methionine                                           | NA    | NA   | 59-51-8    | 876       | CSDB  |
|  |  |  | galactose                                            | NA    | NA   | 59-23-4    | 6036      | CSDB  |
|  |  |  | galacturonic acid                                    | 29.75 | 0.04 | 14982-50-4 | 84740     | CSDB  |
|  |  |  | serine                                               | NA    | NA   | 6898-95-9  | 617       | CSDB  |
|  |  |  | quinguenoside R1                                     | NA    | NA   | 85013-02-1 | 101679657 | CSDB  |
|  |  |  | oleanic acid                                         | 29.02 | 0.76 | 508-02-1   | 10494     | CSDB  |
|  |  |  | caprylic acid                                        | 16.4  | 0.02 | 124-07-2   | 379       | CSDB  |
|  |  |  | isoleucine                                           | NA    | NA   | 7004-09-3  | 791       | CSDB  |
|  |  |  | maltose                                              | 1.8   | 0.24 | 69-79-4    | 6255      | CSDB  |
|  |  |  | daucosterol                                          | 20.63 | 0.62 | 474-58-8   | 5742590   | CSDB  |
|  |  |  | threonine                                            | NA    | NA   | 72-19-5    | 6288      | CSDB  |
|  |  |  | stigmast-3,5-dien-3-one                              | 43.87 | 0.75 | 2034-72-2  | 12444466  | CSDB  |
|  |  |  | stigmast-7-enol                                      | 13.01 | 0.76 | 481-19-6   | 12303924  | CSDB  |
|  |  |  | vitamin B6                                           | NA    | NA   | 65-23-6    | 1054      | CSDB  |
|  |  |  | eleutheroside A                                      | NA    | NA   | 474-58-8   | 5742590   | CSDB  |
|  |  |  | alexandrin                                           | NA    | NA   | 474-58-8   | 5742590   | CSDB  |
|  |  |  | glutamic acid                                        | NA    | NA   | 6899-05-4  | 611       | CSDB  |
|  |  |  | lecithin                                             | NA    | NA   | 8002-43-5  | 5287971   | CSDB  |
|  |  |  | octanol                                              | 21.06 | 0.01 | 111-87-5   | 957       | CSDB  |
|  |  |  | arabinose                                            | NA    | NA   | 147-81-9   | 854       | CSDB  |
|  |  |  | phenylalanine                                        | NA    | NA   | 63-91-2    | 6140      | CSDB  |
|  |  |  | 4-phenylundecane                                     | NA    | NA   | 4536-86-1  | 20654     | CSDB  |
|  |  |  | 6-phenylundecane                                     | 4.44  | 0.07 | 4537-14-8  | 20660     | CSDB  |
|  |  |  | 5-phenyldodecane                                     | NA    | NA   | 2719-63-3  | 17630     | CSDB  |
|  |  |  | 6-phenyldodecane                                     | NA    | NA   | 2719-62-2  | 17629     | CSDB  |
|  |  |  | 4-phenyltridecane                                    | NA    | NA   | 4534-51-4  | 20634     | CSDB  |
|  |  |  | 5-phenyltridecane                                    | NA    | NA   | 4534-50-3  | 20633     | CSDB  |
|  |  |  | 1-phenylhexane                                       | 18.37 | 0.03 | 1077-16-3  | 14109     | CSDB  |
|  |  |  | 3-phenylhexane                                       | NA    | NA   | 4468-42-2  | 20546     | CSDB  |
|  |  |  | 3-phenyldecane                                       | NA    | NA   | 4621-36-7  | 20740     | CSDB  |
|  |  |  | pinocarveol                                          | NA    | NA   | 5947-36-4  | 102667    | CSDB  |
|  |  |  | pectin                                               | 40.39 | 0.06 | NA         | 441476    | CSDB  |
|  |  |  | fructose                                             | 1.68  | 0.03 | 57-48-7    | 5984      | CSDB  |
|  |  |  | $\beta$ -farnesene                                   | 17.42 | 0.05 | 18794-84-8 | 5281517   | CSDB  |
|  |  |  | heptanoic acid                                       | 13.38 | 0.01 | 111-14-8   | 8094      | CSDB  |
|  |  |  | histidine                                            | NA    | NA   | 71-00-1    | 6274      | CSDB  |
|  |  |  | pulegone                                             | NA    | NA   | 15932-80-6 | 6988      | CSDB  |
|  |  |  | $\alpha$ -cedrene                                    | NA    | NA   | 469-61-4   | 6431015   | CSDB  |
|  |  |  | leucine                                              | NA    | NA   | 61-90-5    | 6106      | CSDB  |
|  |  |  | $\alpha$ -curcumene                                  | NA    | NA   | 644-30-4   | 92139     | CSDB  |
|  |  |  | gypenoside XI                                        | NA    | NA   | 80321-64-8 | 11535296  | CSDB  |
|  |  |  | gypenosideXVII                                       | 4.86  | 0.1  | 80321-69-3 | 44584555  | CSDB  |
|  |  |  | cephalin                                             | NA    | NA   | 78535-48-5 | 65109     | CSDB  |
|  |  |  | phosphatidyl                                         | NA    | NA   | 78535-48-5 | 65109     | CSDB  |
|  |  |  | $\beta$ -bisabolene                                  | 20.3  | 0.06 | 495-61-4   | 10104370  | CSDB  |
|  |  |  | pseudoginsenoside F11                                | 24.56 | 0.19 | 69884-00-0 | 21633072  | CSDB  |
|  |  |  | pseudoginsenoside RT5                                | 9.44  | 0.46 | 98474-78-3 | 21633075  | CSDB  |
|  |  |  | proline                                              | NA    | NA   | 147-85-3   | 145742    | CSDB  |
|  |  |  | vitamin A                                            | 19.53 | 0.16 | 68-26-8    | 445354    | CSDB  |
|  |  |  | pyridoxine                                           | 61.54 | 0.04 | 65-23-6    | 1054      | CSDB  |
|  |  |  | D-glucose                                            | NA    | NA   | NA         | 5793      | CSDB  |
|  |  |  | lysine                                               | 29.33 | 0.02 | 56-87-1    | 5962      | CSDB  |
|  |  |  | tyrosine                                             | NA    | NA   | 60-18-4    | 6057      | CSDB  |
|  |  |  | rhamnose                                             | NA    | NA   | NA         | 25310     | CSDB  |
|  |  |  | lysolecithin                                         | NA    | NA   | 14863-27-5 | 86554     | CSDB  |
|  |  |  | lysophosphatidyl choline                             | NA    | NA   | NA         | 86554     | CSDB  |
|  |  |  | sucrose                                              | 7.17  | 0.23 | NA         | 5988      | CSDB  |
|  |  |  | arginine                                             | NA    | NA   | 74-79-3    | 6322      | CSDB  |
|  |  |  | valine                                               | NA    | NA   | 72-18-4    | 6287      | CSDB  |
|  |  |  | phosphatidylserine                                   | NA    | NA   | 7331-08-0  | 68841     | CSDB  |
|  |  |  | panose B                                             | NA    | NA   | NA         | NA        | CSDB  |
|  |  |  | panose C                                             | NA    | NA   | NA         | NA        | CSDB  |
|  |  |  | panose D                                             | NA    | NA   | 33401-87-5 | 94448     | CSDB  |
|  |  |  | malonyl-ginsenoside Rb2                              | NA    | NA   | NA         | 14162969  | CSDB  |
|  |  |  | malonyl-ginsenoside Rd                               | NA    | NA   | 88140-37-8 | 14162967  | CSDB  |
|  |  |  | 8E-1,8-heptadecadien-4,6-diyn-3,10-diol              | NA    | NA   | NA         | NA        | CSDB  |
|  |  |  | $\alpha$ -curcumene( R-)                             | NA    | NA   | 4176-17-4  | 442360    | CSDB  |
|  |  |  | $\alpha$ -curcumene( S-)                             | NA    | NA   | 4176-06-1  | 3083834   | CSDB  |
|  |  |  | sorbose                                              | NA    | NA   | NA         | 439192    | CSDB  |
|  |  |  | diphosphatidylglycerol                               | NA    | NA   | NA         | 644275    | CSDB  |
|  |  |  | gypenosideXII                                        | NA    | NA   | NA         | NA        | CSDB  |
|  |  |  | gypenosideIV                                         | NA    | NA   | NA         | NA        | CSDB  |
|  |  |  | polyacetylene PQ-1                                   | NA    | NA   | NA         | NA        | CSDB  |
|  |  |  | lecithin                                             | NA    | NA   | 8002-43-5  | 5287971   | CSDB  |
|  |  |  | 2-phenyldodecane                                     | NA    | NA   | NA         | 17628     | CSDB  |
|  |  |  | 3-phenyldodecane                                     | NA    | NA   | NA         | 16979     | CSDB  |
|  |  |  | 4-phenyldodecane                                     | NA    | NA   | NA         | 17631     | CSDB  |
|  |  |  | ocotillo                                             | NA    | NA   | NA         | 102058355 | CSDB  |
|  |  |  | peperitene                                           | NA    | NA   | NA         | NA        | CSDB  |
|  |  |  | phosphatidylinositol                                 | NA    | NA   | NA         | NA        | CSDB  |
|  |  |  | polyacetylene PQ-2                                   | NA    | NA   | NA         | NA        | CSDB  |
|  |  |  | polyacetylene PQ-3                                   | NA    | NA   | NA         | NA        | CSDB  |
|  |  |  | polyacetylene PQ-4                                   | NA    | NA   | NA         | NA        | CSDB  |
|  |  |  | polyacetylene PQ-5                                   | NA    | NA   | NA         | NA        | CSDB  |
|  |  |  | polyacetylene PQ-6                                   | NA    | NA   | NA         | NA        | CSDB  |
|  |  |  | 3-phenylundecane                                     | NA    | NA   | 8402-33-7  | 20655     | CSDB  |
|  |  |  | (+)-8-Methylcapric acid                              | NA    | NA   | NA         | 13828369  | TCMID |
|  |  |  | (3S,9R,10S)-3-Acetoxy-9,10-epoxy-1-heptadecene-4,    | NA    | NA   | NA         | 101341430 | TCMID |
|  |  |  | 1,3,5-triisopropylphene                              | 19.68 | 0.05 | 27322-34-5 | 12860     | TCMID |
|  |  |  | 1-phenylhexane                                       | 18.37 | 0.03 | 74296-34-7 | 14109     | TCMID |
|  |  |  | 16-oxoseratenediol                                   | NA    | NA   | NA         | 5320337   | TCMID |
|  |  |  | 2,6-diterbutyl-4-methyl phenol                       | 40.02 | 0.07 | 50356-19-9 | 31404     | TCMID |
|  |  |  | 2-(rho-cyclohexyl-phenoxy)ethanol                    | NA    | NA   | NA         | 347560    | TCMID |
|  |  |  | 2-phenyldodecane                                     | NA    | NA   | NA         | 17628     | TCMID |
|  |  |  | 20(r)-ginsenoside rg3                                | NA    | NA   | NA         | 44416767  | TCMID |
|  |  |  | 20(r)-ginsenoside-rh1                                | NA    | NA   | NA         | 124928670 | TCMID |
|  |  |  | 20(s)-ginsenosiderh1                                 | NA    | NA   | NA         | 123134432 | TCMID |
|  |  |  | 20-(r)-ginsenoside-rg2                               | NA    | NA   | NA         | NA        | TCMID |
|  |  |  | 20-(s)-ginsenoside-rg3                               | NA    | NA   | NA         | NA        | TCMID |
|  |  |  | 20-hexadecanoylingenol                               | NA    | NA   | NA         | 5318035   | TCMID |
|  |  |  | 3-cyclohexyldodecane                                 | NA    | NA   | NA         | 524423    | TCMID |
|  |  |  | 3-methoxyherbacetin                                  | NA    | 23.5 | 0.3        | 5319442   | TCMID |
|  |  |  | 3-o-beta-d-xylopyranosyl-(1-6)-beta-d-glucopyranosyl | NA    | NA   | NA         | 101718876 | TCMID |
|  |  |  | 3-octanol                                            | NA    | NA   | NA         | 11527     | TCMID |
|  |  |  | 3-phenyldecane                                       | NA    | NA   | NA         | 20740     | TCMID |
|  |  |  | 3-phenyldodecane                                     | NA    | NA   | NA         | 16979     | TCMID |
|  |  |  | 3-phenylundecane                                     | NA    | NA   | NA         | 20655     | TCMID |

|   |    |         |                                   |                                                   |       |      |             |           |       |
|---|----|---------|-----------------------------------|---------------------------------------------------|-------|------|-------------|-----------|-------|
|   |    |         |                                   | 3β,6α,12β,20s,25-pentahydroxyl-dammar-23-ene-6-o- | NA    | NA   | NA          | NA        | TCMID |
|   |    |         |                                   | 4-phenyldodecane                                  | NA    | NA   | NA          | 17631     | TCMID |
|   |    |         |                                   | 4-phenyltridecane                                 | NA    | NA   | NA          | 20634     | TCMID |
|   |    |         |                                   | 4-phenylundecane                                  | NA    | NA   | NA          | 20654     | TCMID |
|   |    |         |                                   | 5-phenyldodecane                                  | NA    | NA   | NA          | 17630     | TCMID |
|   |    |         |                                   | 5-phenyldodecane                                  | NA    | NA   | NA          | 20633     | TCMID |
|   |    |         |                                   | 5-phenyltridecane                                 | NA    | NA   | NA          | 20633     | TCMID |
|   |    |         |                                   | 6&#39;&#39;-malonylginsenosiderd1                 | NA    | NA   | NA          | NA        | TCMID |
|   |    |         |                                   | 6-phenyldodecane                                  | NA    | NA   | NA          | 17629     | TCMID |
|   |    |         |                                   | 6-phenylundecane                                  | 4.44  | 0.07 | 4537-14-8   | 20660     | TCMID |
|   |    |         |                                   | 7-deacetylcanaensene                              | NA    | NA   | NA          | 54741159  | TCMID |
|   |    |         |                                   | alpha-farnesene                                   | NA    | NA   | NA          | 10330772  | TCMID |
|   |    |         |                                   | alpha-guriunene                                   | NA    | NA   | NA          | 5317859   | TCMID |
|   |    |         |                                   | bata-caryophyllene                                | NA    | NA   | NA          | 20831623  | TCMID |
|   |    |         |                                   | beta-bisabolene                                   | 20.3  | 0.06 | 495-61-4    | 10104370  | TCMID |
|   |    |         |                                   | beta-curcumene                                    | NA    | NA   | NA          | 14014430  | TCMID |
|   |    |         |                                   | caffetannic acid                                  | 11.93 | 0.33 | 202650-88-2 | 1794427   | TCMID |
|   |    |         |                                   | calarene                                          | NA    | NA   | NA          | 6432176   | TCMID |
|   |    |         |                                   | caproicacid                                       | 73.08 | 0.01 | 142-62-1    | 8892      | TCMID |
|   |    |         |                                   | caprylic acid                                     | NA    | NA   | NA          | 23664772  | TCMID |
|   |    |         |                                   | caprylicacid                                      | 16.4  | 0.02 | 68937-74-6  | 379       | TCMID |
|   |    |         |                                   | capsaicin(e)                                      | NA    | NA   | NA          | 2548      | TCMID |
|   |    |         |                                   | casticin                                          | 27.36 | 0.44 | 479-91-4    | 5315263   | TCMID |
|   |    |         |                                   | cis-9,cis-12-linoleicacid                         | NA    | NA   | NA          | NA        | TCMID |
|   |    |         |                                   | danshensuan b                                     | 3.01  | 0.41 | 83415-79-6  | 6451084   | TCMID |
|   |    |         |                                   | daturicacid                                       | 18.51 | 0.12 | 67701-03-5  | 10465     | TCMID |
|   |    |         |                                   | daturilin                                         | NA    | NA   | NA          | 71718229  | TCMID |
|   |    |         |                                   | diterbutyl phthalate                              | 43.67 | 0.13 | 30448-43-2  | 121712    | TCMID |
|   |    |         |                                   | dodecane                                          | NA    | NA   | NA          | 5359624   | TCMID |
|   |    |         |                                   | dodecanol                                         | NA    | NA   | NA          | 6443191   | TCMID |
|   |    |         |                                   | enanthicacid                                      | 13.38 | 0.01 | 111-14-8    | 8094      | TCMID |
|   |    |         |                                   | encecalin                                         | 21.36 | 0.11 | 20628-09-5  | 114703    | TCMID |
|   |    |         |                                   | ginsenoside                                       | NA    | NA   | NA          | 3086007   | TCMID |
|   |    |         |                                   | ginsenoside rc                                    | NA    | NA   | NA          | 44181925  | TCMID |
|   |    |         |                                   | ginsenoside rh2                                   | NA    | NA   | NA          | 45479218  | TCMID |
|   |    |         |                                   | ginsenoside-ra0                                   | NA    | NA   | NA          | NA        | TCMID |
|   |    |         |                                   | ginsenoside-ra1                                   | NA    | NA   | NA          | 100941542 | TCMID |
|   |    |         |                                   | ginsenoside-rb2                                   | NA    | NA   | NA          | 44575879  | TCMID |
|   |    |         |                                   | ginsenoside-rb3                                   | NA    | NA   | NA          | 12912363  | TCMID |
|   |    |         |                                   | ginsenoside-rc                                    | NA    | NA   | NA          | 100018    | TCMID |
|   |    |         |                                   | ginsenoside-rd                                    | NA    | NA   | NA          | 12855925  | TCMID |
|   |    |         |                                   | ginsenoside-re                                    | NA    | NA   | NA          | 73149     | TCMID |
|   |    |         |                                   | ginsenoside-rf                                    | 17.74 | 0.24 | 52286-58-5  | 441922    | TCMID |
|   |    |         |                                   | ginsenoside-rg1                                   | 10.04 | 0.28 | 22427-39-0  | 441923    | TCMID |
|   |    |         |                                   | ginsenosidera0                                    | NA    | NA   | NA          | NA        | TCMID |
|   |    |         |                                   | ginsenosiderb1                                    | 6.43  | 0.04 | 41753-43-9  | 9898279   | TCMID |
|   |    |         |                                   | ginsenosiderb2                                    | 6.02  | 0.04 | 11021-13-9  | 6917976   | TCMID |
|   |    |         |                                   | ginsenosiderb3                                    | NA    | NA   | NA          | NA        | TCMID |
|   |    |         |                                   | ginsenosiderc                                     | NA    | NA   | NA          | 122173267 | TCMID |
|   |    |         |                                   | ginsenosiderd                                     | 5.5   | 0.09 | 52705-93-8  | 11679800  | TCMID |
|   |    |         |                                   | ginsenosidere                                     | NA    | NA   | NA          | 44584757  | TCMID |
|   |    |         |                                   | ginsenosiderf                                     | 17.74 | 0.24 | 52286-58-5  | 441922    | TCMID |
|   |    |         |                                   | ginsenosiderg1                                    | NA    | NA   | NA          | 122130520 | TCMID |
|   |    |         |                                   | ginsenosiderg2                                    | 10.09 | 0.26 | 52286-74-5  | 21599924  | TCMID |
|   |    |         |                                   | ginsenosidero                                     | 1.95  | 0.05 | 34367-04-9  | 11815492  | TCMID |
|   |    |         |                                   | ginsenoyn e                                       | NA    | NA   | NA          | 5320336   | TCMID |
|   |    |         |                                   | hexadecane                                        | NA    | NA   | NA          | 172416    | TCMID |
|   |    |         |                                   | hexadecanoic acid                                 | NA    | NA   | NA          | 5326436   | TCMID |
|   |    |         |                                   | hexadecanoicacid                                  | NA    | NA   | NA          | 520159    | TCMID |
|   |    |         |                                   | isoeugenol                                        | NA    | NA   | NA          | 23668813  | TCMID |
|   |    |         |                                   | isofernene                                        | NA    | NA   | NA          | 5318564   | TCMID |
|   |    |         |                                   | linarionoside                                     | NA    | NA   | NA          | 11068789  | TCMID |
|   |    |         |                                   | lindenene                                         | NA    | NA   | NA          | 5319032   | TCMID |
|   |    |         |                                   | malonylginsenoside rd                             | NA    | NA   | NA          | 11968726  | TCMID |
|   |    |         |                                   | malonylginsenosiderb2                             | NA    | NA   | NA          | 14162969  | TCMID |
|   |    |         |                                   | malonylginsenosiderd                              | NA    | NA   | NA          | 14162967  | TCMID |
|   |    |         |                                   | methyl caprylate                                  | 18.17 | 0.02 | 111-11-5    | 8091      | TCMID |
|   |    |         |                                   | n-nonanol                                         | 33.19 | 0.01 | 143-08-8    | 8914      | TCMID |
|   |    |         |                                   | nonanoicacid                                      | 53.29 | 0.88 | 128-62-1    | 275196    | TCMID |
|   |    |         |                                   | octanol                                           | NA    | NA   | NA          | 11527     | TCMID |
|   |    |         |                                   | panaqueinquecol 1                                 | NA    | NA   | NA          | 5320688   | TCMID |
|   |    |         |                                   | panaxydol                                         | NA    | NA   | NA          | 10825263  | TCMID |
|   |    |         |                                   | panose                                            | NA    | NA   | NA          | 44630447  | TCMID |
|   |    |         |                                   | panose b                                          | NA    | NA   | NA          | 10973188  | TCMID |
|   |    |         |                                   | panose c                                          | NA    | NA   | NA          | 193471    | TCMID |
|   |    |         |                                   | papaverine                                        | NA    | NA   | NA          | 6084      | TCMID |
|   |    |         |                                   | phenol                                            | NA    | NA   | NA          | 49771170  | TCMID |
|   |    |         |                                   | phenyl isothiocyanate                             | NA    | NA   | NA          | 7673      | TCMID |
|   |    |         |                                   | phenyl-2-propanone                                | 39.66 | 0.02 | 103-79-7    | 7678      | TCMID |
|   |    |         |                                   | phenylethyl acetate                               | 22.99 | 0.04 | 103-45-7    | 7654      | TCMID |
|   |    |         |                                   | phlegmariuine-n                                   | 51.66 | 0.06 | 126552-19-0 | 195484    | TCMID |
|   |    |         |                                   | picroside i                                       | NA    | NA   | NA          | 45358142  | TCMID |
|   |    |         |                                   | picroside ii                                      | NA    | NA   | NA          | 53399204  | TCMID |
|   |    |         |                                   | picroside iii                                     | NA    | NA   | NA          | 24121289  | TCMID |
|   |    |         |                                   | pq-2                                              | NA    | NA   | NA          | 5320689   | TCMID |
|   |    |         |                                   | praeruptorin                                      | NA    | NA   | NA          | 5320690   | TCMID |
|   |    |         |                                   | pulegone                                          | NA    | NA   | NA          | 11665448  | TCMID |
|   |    |         |                                   | pulsatillilic acid                                | NA    | NA   | NA          | 11155643  | TCMID |
|   |    |         |                                   | quinqenoside fl                                   | NA    | NA   | NA          | 102304202 | TCMID |
|   |    |         |                                   | quinqenosider1                                    | NA    | NA   | NA          | 101679657 | TCMID |
|   |    |         |                                   | stearicacid                                       | 17.83 | 0.14 | 609343-71-7 | 5281      | TCMID |
|   |    |         |                                   | sucrose                                           | NA    | NA   | NA          | 53301851  | TCMID |
|   |    |         |                                   | trans-9-trans-12-linoleic acid                    | NA    | NA   | NA          | 5280644   | TCMID |
|   |    |         |                                   | trilinolein                                       | NA    | NA   | NA          | 45109763  | TCMID |
|   |    |         |                                   | α-curcumene                                       | 4.68  | 0.06 | 4176-17-4   | 442360    | TCMID |
|   |    |         |                                   | β-bisabolene                                      | 20.3  | 0.06 | 495-61-4    | 10104370  | TCMID |
|   |    |         |                                   | β-caryophyllene                                   | NA    | NA   | NA          | 18502770  | TCMID |
|   |    |         |                                   | β-d-xylopyranosyl-(1→6)-α-d-glucopyranosyl-(1→6)- | NA    | NA   | NA          | NA        | TCMID |
|   |    |         |                                   | β-farnesene                                       | NA    | NA   | NA          | 5281517   | TCMID |
| 4 | 茵陈 | Yinchen | <i>Artemisiae Scopariae Herba</i> | isorhamnetin                                      | 49.6  | 0.31 | 480-19-3    | 5281654   | TCMSP |
|   |    |         |                                   | beta-sitosterol                                   | 36.91 | 0.75 | 83-46-5     | 222284    | TCMSP |
|   |    |         |                                   | Areapillin                                        | 48.96 | 0.41 | 83162-82-7  | 158311    | TCMSP |
|   |    |         |                                   | Genkwanin                                         | 37.13 | 0.24 | 437-64-9    | 5281617   | TCMSP |
|   |    |         |                                   | Skrofullein                                       | 30.35 | 0.3  | 6601-62-3   | 188323    | TCMSP |
|   |    |         |                                   | Isoareapillin                                     | 57.4  | 0.41 | 85819-50-7  | 5318508   | TCMSP |
|   |    |         |                                   | Eupalitin                                         | 46.11 | 0.33 | 29536-41-2  | 5748611   | TCMSP |
|   |    |         |                                   | Eupatolitin                                       | 42.55 | 0.37 | 29536-44-5  | 5317291   | TCMSP |
|   |    |         |                                   | capillarisin                                      | 57.56 | 0.31 | 56365-38-9  | 5281342   | TCMSP |
|   |    |         |                                   | 4'-Methylcapillarisin                             | 72.18 | 0.35 | 520-12-7    | 5319540   | TCMSP |
|   |    |         |                                   | Demethoxycapillarisin                             | 52.33 | 0.25 | 61854-36-2  | 5316511   | TCMSP |
|   |    |         |                                   | Artepillin A                                      | 68.32 | 0.24 | NA          | NA        | TCMSP |
|   |    |         |                                   | quercetin                                         | 46.43 | 0.28 | 73123-10-1  | 5280343   | TCMSP |
|   |    |         |                                   | ethyl geranate                                    | 25.94 | 0.04 | 105-87-3    | 1549026   | CSDB  |
|   |    |         |                                   | limonene                                          | NA    | NA   | 7705-14-8   | 22311     | CSDB  |
|   |    |         |                                   | 3,5-dimethoxyallylbenzene                         | NA    | NA   | NA          | 524874    | CSDB  |
|   |    |         |                                   | eupatilin                                         | 29.39 | 0.38 | 22368-21-4  | 5273755   | CSDB  |
|   |    |         |                                   | genkwanin                                         | 37.13 | 0.24 | 437-64-9    | 5281617   | CSDB  |

|  |  |  |  |                                     |       |      |             |          |       |
|--|--|--|--|-------------------------------------|-------|------|-------------|----------|-------|
|  |  |  |  | $\beta$ -caryophyllene              | 29.7  | 0.09 | 87-44-5     | 5281515  | CSDB  |
|  |  |  |  | caryophellene                       | NA    | NA   | NA          | NA       | CSDB  |
|  |  |  |  | butanoic acid                       | 21.62 | 0    | 107-92-6    | 264      | CSDB  |
|  |  |  |  | butyl aldehyde                      | 68.66 | 0    | 123-72-8    | 261      | CSDB  |
|  |  |  |  | 3,5,4'-trihydroxy-7-methoxyflavone  | 56.56 | 0.27 | 51857-11-5  | 1268276  | CSDB  |
|  |  |  |  | emodin                              | 24.4  | 0.24 | 518-82-1    | 3220     | CSDB  |
|  |  |  |  | quercetin                           | 46.43 | 0.28 | 117-39-5    | 5280343  | CSDB  |
|  |  |  |  | kaempferl-3-O-glucogalactoside      | NA    | NA   | NA          | NA       | CSDB  |
|  |  |  |  | caproic acid                        | 73.08 | 0.01 | 142-62-1    | 8892     | CSDB  |
|  |  |  |  | aesculetin dimethyl ether           | 22.97 | 0.07 | 305-01-1    | 5281416  | CSDB  |
|  |  |  |  | scoparone                           | 74.75 | 0.09 | 120-08-1    | 8417     | CSDB  |
|  |  |  |  | 6,7-dimethoxycoumarin               | 74.75 | 0.09 | 120-08-1    | 8417     | CSDB  |
|  |  |  |  | cirsilneol                          | 4.81  | 0.37 | 41365-32-6  | 162464   | CSDB  |
|  |  |  |  | myrcene                             | 24.96 | 0.02 | 123-35-3    | 31253    | CSDB  |
|  |  |  |  | 6-demethoxy-4'-O-methylcapillarisin | NA    | NA   | NA          | NA       | CSDB  |
|  |  |  |  | 6-demethoxycapillarisin             | 52.33 | 0.25 | 61854-36-2  | 5316511  | CSDB  |
|  |  |  |  | dehydrofalcari none                 | NA    | NA   | 4117-05-9   | 441545   | CSDB  |
|  |  |  |  | dehydrofalcari none                 | NA    | NA   | 36150-08-0  | 13895593 | CSDB  |
|  |  |  |  | $\beta$ -gurjunene                  | NA    | NA   | 17334-55-3  | 28481    | CSDB  |
|  |  |  |  | scopoletin                          | 27.77 | 0.08 | 92-61-5     | 5280460  | CSDB  |
|  |  |  |  | scopoletin                          | 27.77 | 0.08 | 92-61-5     | 5280460  | CSDB  |
|  |  |  |  | baogongteng B                       | 27.77 | 0.08 | 92-61-5     | 5280460  | CSDB  |
|  |  |  |  | 7-methylesculetin                   | NA    | NA   | NA          | NA       | CSDB  |
|  |  |  |  | 4'-methylcapillarisin               | 41.17 | 0.3  | NA          | 5320438  | CSDB  |
|  |  |  |  | 7-methylcapillarisin                | 30.35 | 0.3  | NA          | 188323   | CSDB  |
|  |  |  |  | 70methylaromadendrin                | NA    | NA   | NA          | NA       | CSDB  |
|  |  |  |  | eupatolitin                         | 42.55 | 0.37 | 29536-44-5  | 5317291  | CSDB  |
|  |  |  |  | p-ethylphenol                       | 48.44 | 0.02 | 123-07-9    | 31242    | CSDB  |
|  |  |  |  | p-cresol                            | 51.99 | 0.01 | 106-44-5    | 2879     | CSDB  |
|  |  |  |  | p-hydroxyacetophenone               | 36.8  | 0.03 | 99-93-4     | 7469     | CSDB  |
|  |  |  |  | p-cymol                             | 27.2  | 0.02 | 99-87-6     | 7463     | CSDB  |
|  |  |  |  | linoleic acid                       | 41.9  | 0.14 | 60-33-3     | 5280450  | CSDB  |
|  |  |  |  | capric acid                         | 26.74 | 0.03 | 334-48-5    | 2969     | CSDB  |
|  |  |  |  | isoeugenol                          | 70.1  | 0.04 | 97-54-1     | 853433   | CSDB  |
|  |  |  |  | isoscopoletin                       | 23.46 | 0.08 | 776-86-3    | 69894    | CSDB  |
|  |  |  |  | isocarapillin                       | 57.4  | 0.41 | NA          | 5318508  | CSDB  |
|  |  |  |  | isorhamnetin                        | 49.6  | 0.31 | 480-19-3    | 5281654  | CSDB  |
|  |  |  |  | quercetin-3'-methyl ether           | 49.6  | 0.31 | 480-19-3    | 5281654  | CSDB  |
|  |  |  |  | cacticin                            | NA    | NA   | 6743-92-6   | 86328677 | CSDB  |
|  |  |  |  | isorhamnetin-3-O-glucoside          | 4.11  | 0.8  | 50306-07-5  | 5318645  | CSDB  |
|  |  |  |  | 5,4'-dihydroxy-7-methoxyflavone     | 37.13 | 0.24 | 437-64-9    | 5281617  | CSDB  |
|  |  |  |  | rutin                               | 3.2   | 0.68 | 153-18-4    | 5280805  | CSDB  |
|  |  |  |  | o-ethylphenol                       | 57.43 | 0.02 | 90-00-6     | 6997     | CSDB  |
|  |  |  |  | o-methoxycapillene                  | NA    | NA   | NA          | NA       | CSDB  |
|  |  |  |  | o-cresol                            | 62.45 | 0.02 | 95-48-7     | 335      | CSDB  |
|  |  |  |  | m-cresol                            | 53.95 | 0.01 | NA          | 342      | CSDB  |
|  |  |  |  | 5-phenyl-1,3-pentadiyne             | 38.06 | 0.03 | 41268-41-1  | 587245   | CSDB  |
|  |  |  |  | phenol                              | NA    | NA   | 108-95-2    | 996      | CSDB  |
|  |  |  |  | apiole                              | 16.82 | 0.09 | 523-80-8    | 10659    | CSDB  |
|  |  |  |  | chlorogenic acid                    | 11.93 | 0.33 | 327-97-9    | 1794427  | CSDB  |
|  |  |  |  | caffeic acid                        | 25.76 | 0.05 | 331-39-5    | 689043   | CSDB  |
|  |  |  |  | thujone                             | NA    | NA   | 471-15-8    | 91456    | CSDB  |
|  |  |  |  | thujylalcohol                       | NA    | NA   | NA          | NA       | CSDB  |
|  |  |  |  | hyperoside                          | 6.94  | 0.77 | 482-36-0    | 5281643  | CSDB  |
|  |  |  |  | hyperoside                          | 6.94  | 0.77 | 482-36-0    | 5281643  | CSDB  |
|  |  |  |  | norcapillene                        | 15.35 | 0.03 | 4009-22-7   | 10983572 | CSDB  |
|  |  |  |  | adinene                             | 14.76 | 0.08 | 24406-05-1  | 12306048 | CSDB  |
|  |  |  |  | capillene                           | 47.19 | 0.03 | 520-74-1    | 3083613  | CSDB  |
|  |  |  |  | capillin                            | 52.44 | 0.04 | 495-74-9    | 10321    | CSDB  |
|  |  |  |  | capillarisin                        | 57.56 | 0.31 | 56365-38-9  | 5281342  | CSDB  |
|  |  |  |  | capillanol                          | NA    | NA   | 57576-57-5  | 5315669  | CSDB  |
|  |  |  |  | capillarin                          | 87.01 | 0.08 | 3570-28-3   | 3083811  | CSDB  |
|  |  |  |  | capillone                           | NA    | NA   | 495-74-9    | 10321    | CSDB  |
|  |  |  |  | artepillin A                        | NA    | NA   | 114590-54-4 | 21626500 | CSDB  |
|  |  |  |  | arcapillin                          | 48.96 | 0.41 | 83162-82-7  | 158311   | CSDB  |
|  |  |  |  | capillartemis in A                  | 23.76 | 0.19 | 85819-52-9  | 6439717  | CSDB  |
|  |  |  |  | $\alpha$ -bergamotene               | 18.43 | 0.09 | 13474-59-4  | 6429302  | CSDB  |
|  |  |  |  | choline                             | 0.47  | 0.01 | 62-49-7     | 305      | CSDB  |
|  |  |  |  | $\alpha$ -curcumene                 | NA    | NA   | 644-30-4    | 92139    | CSDB  |
|  |  |  |  | cineole                             | 39.73 | 0.05 | 470-82-6    | 2758     | CSDB  |
|  |  |  |  | spathulenol                         | NA    | NA   | 70389-88-7  | 14137570 | CSDB  |
|  |  |  |  | 5'-caffeoylquinic acid              | 19.61 | 0.33 | 906-33-2    | 5280633  | CSDB  |
|  |  |  |  | carvone                             | NA    | NA   | 99-49-0     | 7439     | CSDB  |
|  |  |  |  | $\alpha$ -humulene                  | 22.98 | 0.06 | 6753-98-6   | 5281520  | CSDB  |
|  |  |  |  | $\alpha$ -pinene                    | NA    | NA   | 80-56-8     | 6654     | CSDB  |
|  |  |  |  | $\beta$ -pinene                     | NA    | NA   | 127-91-3    | 14896    | CSDB  |
|  |  |  |  | artemetin                           | 49.55 | 0.48 | 479-90-3    | 5320351  | CSDB  |
|  |  |  |  | $\beta$ -elemene                    | NA    | NA   | NA          | 10583    | CSDB  |
|  |  |  |  | rhamnocitrin                        | 12.9  | 0.27 | 569-92-6    | 5320946  | CSDB  |
|  |  |  |  | cirsimaritin                        | 30.35 | 0.3  | 6601-62-3   | 188323   | CSDB  |
|  |  |  |  | quercetin-3,7-rutinodigalactoside   | NA    | NA   | NA          | NA       | CSDB  |
|  |  |  |  | quercetin-3-O-glucogalactoside      | NA    | NA   | NA          | NA       | CSDB  |
|  |  |  |  | furfuryl alcohol                    | 48.27 | 0.01 | 98-00-0     | 7361     | CSDB  |
|  |  |  |  | furfural                            | 34.35 | 0.01 | 98-01-1     | 7362     | CSDB  |
|  |  |  |  | artepillin C                        | 38.39 | 0.17 | 72944-19-5  | 5472440  | CSDB  |
|  |  |  |  | capillartemis in B                  | 12.86 | 0.19 | 85819-51-8  | 6439716  | CSDB  |
|  |  |  |  | geranyl acetate                     | 25.94 | 0.04 | 105-87-3    | 1549026  | CSDB  |
|  |  |  |  | cacticin                            | NA    | NA   | 61391-66-0  | 5318644  | CSDB  |
|  |  |  |  | quercetone                          | 46.43 | 0.28 | 117-39-5    | 5280343  | CSDB  |
|  |  |  |  | $\alpha$ -curcumene( R-)            | 4.68  | 0.06 | 4176-17-4   | 442360   | CSDB  |
|  |  |  |  | $\alpha$ -curcumene( S-)            | 26.56 | 0.06 | 4176-06-1   | 3083834  | CSDB  |
|  |  |  |  | terpinene                           | NA    | NA   | NA          | NA       | CSDB  |
|  |  |  |  | quercetin-3,7-rutinogalactoside     | NA    | NA   | NA          | NA       | CSDB  |
|  |  |  |  | 1, 8-eucalyptol                     | 39.73 | 0.05 | 470-82-6    | 2758     | TCMID |
|  |  |  |  | 1-thujolie                          | NA    | NA   | NA          | NA       | TCMID |
|  |  |  |  | 6, 7-dimethoxycoumarin              | NA    | NA   | NA          | 44315119 | TCMID |
|  |  |  |  | 6,7-dimethylsculetin                | NA    | NA   | NA          | NA       | TCMID |
|  |  |  |  | 6-hydroxy-7-methylesculetin         | NA    | NA   | NA          | 23704348 | TCMID |
|  |  |  |  | acetylborneol                       | NA    | NA   | NA          | NA       | TCMID |
|  |  |  |  | alpha-humulene                      | 22.98 | 0.06 | 19132-75-3  | 5281520  | TCMID |
|  |  |  |  | alpha-pinene                        | NA    | NA   | NA          | NA       | TCMID |
|  |  |  |  | alpha-terpineol                     | 48.8  | 0.03 | 10482-56-1  | 443162   | TCMID |
|  |  |  |  | ar-cureumene                        | NA    | NA   | NA          | NA       | TCMID |
|  |  |  |  | areapillin                          | 48.96 | 0.41 | 83162-82-7  | 158311   | TCMID |
|  |  |  |  | azelaic acid                        | NA    | NA   | NA          | 3801344  | TCMID |
|  |  |  |  | beta-caryophyllene                  | NA    | NA   | NA          | 5322111  | TCMID |
|  |  |  |  | beta-elemene                        | 25.63 | 0.06 | 122-78-1    | 6918391  | TCMID |
|  |  |  |  | beta-sitosterol                     | NA    | NA   | NA          | 53399246 | TCMID |
|  |  |  |  | butylaldehyde                       | NA    | NA   | NA          | NA       | TCMID |
|  |  |  |  | cacticin                            | NA    | NA   | NA          | 5318644  | TCMID |
|  |  |  |  | adinene                             | 23.29 | 0.08 | NA          | 9548708  | TCMID |
|  |  |  |  | caffeic acid                        | NA    | NA   | NA          | 54710367 | TCMID |
|  |  |  |  | caffeic acid                        | NA    | NA   | NA          | 54710367 | TCMID |
|  |  |  |  | capillarin                          | NA    | NA   | NA          | NA       | TCMID |
|  |  |  |  | capillanol                          | NA    | NA   | NA          | 5315669  | TCMID |
|  |  |  |  | capillarisin                        | 57.56 | 0.31 | 56365-38-9  | 5281342  | TCMID |
|  |  |  |  | capillartemis in                    | 23.76 | 0.19 | 85819-52-9  | 6439717  | TCMID |

|   |     |             |                                        |                                                                           |       |      |             |           |       |
|---|-----|-------------|----------------------------------------|---------------------------------------------------------------------------|-------|------|-------------|-----------|-------|
|   |     |             |                                        | capillene                                                                 | NA    | NA   | NA          | 6429143   | TCMID |
|   |     |             |                                        | capillin                                                                  | 52.44 | 0.04 | 495-74-9    | 10321     | TCMID |
|   |     |             |                                        | capillon                                                                  | NA    | NA   | NA          | 5315675   | TCMID |
|   |     |             |                                        | carene                                                                    | NA    | NA   | NA          | 26049     | TCMID |
|   |     |             |                                        | carvone                                                                   | 47.43 | 0.03 | 53763-73-8  | 16724     | TCMID |
|   |     |             |                                        | caryophyllene epoxide                                                     | NA    | NA   | NA          | 1742210   | TCMID |
|   |     |             |                                        | chlorogenic acid                                                          | NA    | NA   | NA          | 53399195  | TCMID |
|   |     |             |                                        | chlorogenic acid                                                          | NA    | NA   | NA          | 53399195  | TCMID |
|   |     |             |                                        | cirsilineol                                                               | NA    | NA   | NA          | 14235159  | TCMID |
|   |     |             |                                        | cirsimaunitin                                                             | 30.35 | 0.3  | 6601-62-3   | 188323    | TCMID |
|   |     |             |                                        | dehydrofalcariol                                                          | NA    | NA   | NA          | 13895593  | TCMID |
|   |     |             |                                        | deoxydrofalcariol                                                         | NA    | NA   | NA          | 5281145   | TCMID |
|   |     |             |                                        | eugenol                                                                   | 56.24 | 0.04 | 97-53-0     | 3314      | TCMID |
|   |     |             |                                        | eupatolitin                                                               | 42.55 | 0.37 | 29536-44-5  | 5317291   | TCMID |
|   |     |             |                                        | ferulic acid                                                              | NA    | NA   | NA          | 45039253  | TCMID |
|   |     |             |                                        | furaldehyde                                                               | 34.35 | 0.01 | 98-01-1     | 7362      | TCMID |
|   |     |             |                                        | genkwanin                                                                 | 37.13 | 0.24 | 437-64-9    | 5281617   | TCMID |
|   |     |             |                                        | geraniol acetate                                                          | NA    | NA   | NA          | 24832062  | TCMID |
|   |     |             |                                        | hydroxyacetophenone                                                       | 22.53 | 0.02 | 582-24-1    | 68490     | TCMID |
|   |     |             |                                        | hyperin                                                                   | NA    | NA   | NA          | 54758589  | TCMID |
|   |     |             |                                        | isorhamnetin                                                              | NA    | NA   | NA          | 25202413  | TCMID |
|   |     |             |                                        | methylugenol                                                              | 73.36 | 0.04 | 6380-24-1   | 7127      | TCMID |
|   |     |             |                                        | methylheptylketone                                                        | NA    | NA   | NA          | 42802     | TCMID |
|   |     |             |                                        | methylprotocatechuic acid                                                 | 58.77 | 0.05 | 93-07-2     | 7121      | TCMID |
|   |     |             |                                        | neocapillene                                                              | 24.45 | 0.03 | 10508-66-4  | 5320055   | TCMID |
|   |     |             |                                        | o-methoxycapillen                                                         | NA    | NA   | NA          | 5319414   | TCMID |
|   |     |             |                                        | p-cymene                                                                  | 27.2  | 0.02 | 4939-75-7   | 7463      | TCMID |
|   |     |             |                                        | pyrogallol tannins                                                        | NA    | NA   | NA          | NA        | TCMID |
|   |     |             |                                        | quercetin                                                                 | NA    | NA   | NA          | 46906036  | TCMID |
|   |     |             |                                        | rhamnocitrin                                                              | 12.9  | 0.27 | 20243-59-8  | 5320946   | TCMID |
|   |     |             |                                        | salicylic acid                                                            | NA    | NA   | NA          | 54675850  | TCMID |
|   |     |             |                                        | scoparone                                                                 | 74.75 | 0.09 | 120-08-1    | 8417      | TCMID |
|   |     |             |                                        | scopoletin                                                                | 27.77 | 0.08 | 92-61-5     | 5280460   | TCMID |
|   |     |             |                                        | thujylalcohol                                                             | NA    | NA   | NA          | 12304609  | TCMID |
|   |     |             |                                        | vanillin                                                                  | NA    | NA   | NA          | 11389509  | TCMID |
| 5 | 白及  | Baiji       | <i>Bletillae Rhizoma</i>               | 1-(4-hydroxybenzyl)-4-methoxy-9,10-dihydrophenanthrene                    | 54.18 | 0.55 | NA          | 11163864  | TCMSP |
|   |     |             |                                        | 2,3,4,7-tetramethoxyphenanthrene                                          | 39.09 | 0.29 | NA          | 11437978  | TCMSP |
|   |     |             |                                        | 2,7-dihydroxy-4-methoxyphenanthrene-2,7-O-diglucoside                     | 30.22 | 0.74 | NA          | NA        | TCMSP |
|   |     |             |                                        | 3-(p-hydroxybenzyl)-4-methoxy-9,10-dihydrophenanthrene                    | 37.98 | 0.55 | NA          | 14630662  | TCMSP |
|   |     |             |                                        | 3,7-dihydroxy-2,4-dimethoxyphenanthrene-3-O-glucoside                     | 31.46 | 0.78 | NA          | NA        | TCMSP |
|   |     |             |                                        | 4,7-dihydroxy-1-p-hydroxybenzyl-2-methoxy-9,10-dihydrophenanthrene        | 30.54 | 0.55 | NA          | 44392570  | TCMSP |
|   |     |             |                                        | bletlo A                                                                  | 54.43 | 0.55 | NA          | NA        | TCMSP |
|   |     |             |                                        | blespirol                                                                 | 43.74 | 0.86 | NA          | NA        | TCMSP |
|   |     |             |                                        | 1-(2,7-dihydroxy-4-methoxy-1-phenanthryl)-4-methoxy-3,5-dimethoxybibenzyl | 35.22 | 0.67 | NA          | 9982511   | TCMSP |
|   |     |             |                                        | 3,7-dihydroxy-2,4-dimethoxyphenanthrene-3-O-glucoside                     | 70.79 | 0.12 | 78916-50-4  | 10538117  | CSDB  |
|   |     |             |                                        | 3,3'-dihydroxy-2',6'-bis(p-hydroxybenzyl)-5-methoxyphenanthrene           | NA    | NA   | NA          | NA        | CSDB  |
|   |     |             |                                        | 4,7-dihydroxy-2-methoxy-9,10-dihydrophenanthrene                          | 25.97 | 0.18 | NA          | 442702    | CSDB  |
|   |     |             |                                        | 3,3'-dihydroxy-5-methoxy-2,5',6-tris(p-hydroxybenzyl)phenanthrene         | NA    | NA   | NA          | 87579595  | CSDB  |
|   |     |             |                                        | 2,7-dihydroxy-4-methoxy-phenanthrene-2-O-glucoside                        | NA    | NA   | 151649-59-1 | NA        | CSDB  |
|   |     |             |                                        | 2,7-dihydroxy-4-methoxyphenanthrene-2,7-O-diglucoside                     | NA    | NA   | 151649-60-4 | NA        | CSDB  |
|   |     |             |                                        | 4,7-dihydroxy-1-p-hydroxybenzyl-2-methoxy-9,10-dihydrophenanthrene        | NA    | NA   | NA          | NA        | CSDB  |
|   |     |             |                                        | 2,4,7-trimethoxy-9,10-dihydrophenanthrene                                 | 17.88 | 0.23 | NA          | 15693459  | CSDB  |
|   |     |             |                                        | 2,4,7-trimethoxyphenanthrene                                              | 14.5  | 0.23 | 53077-33-1  | 15693458  | CSDB  |
|   |     |             |                                        | 3,3',5-trimethoxybibenzyl                                                 | 63.21 | 0.16 | NA          | 15693460  | CSDB  |
|   |     |             |                                        | physcion                                                                  | 22.29 | 0.27 | 521-61-9    | 10639     | CSDB  |
|   |     |             |                                        | batatasin III                                                             | 3.75  | 0.12 | 56684-87-8  | 10466989  | CSDB  |
|   |     |             |                                        | 2,6-bis(p-hydroxybenzyl)-3',5-dimethoxy-3-hydroxybibenzyl                 | NA    | NA   | NA          | NA        | CSDB  |
|   |     |             |                                        | 1,6-bis(p-hydroxybenzyl)-4-methoxy-9,10-dihydrophenanthrene               | NA    | NA   | NA          | NA        | CSDB  |
|   |     |             |                                        | 1,8-bis(hydroxybenzyl)-4-methoxyphenanthrene-2,7-diol                     | NA    | NA   | NA          | NA        | CSDB  |
|   |     |             |                                        | 3'-O-methylbatatasin III                                                  | NA    | NA   | NA          | NA        | CSDB  |
|   |     |             |                                        | 2,3,4,7-tetramethoxyphenanthrene                                          | 39.09 | 0.29 | NA          | 11437978  | CSDB  |
|   |     |             |                                        | bletlo A                                                                  | NA    | NA   | 147235-76-3 | NA        | CSDB  |
|   |     |             |                                        | blestrin A                                                                | NA    | NA   | 128700-05-0 | 14583570  | CSDB  |
|   |     |             |                                        | blespirol                                                                 | NA    | NA   | 151484-79-6 | 46942191  | CSDB  |
|   |     |             |                                        | blestriarene A                                                            | NA    | NA   | 126721-53-7 | NA        | CSDB  |
|   |     |             |                                        | blestrianol A                                                             | NA    | NA   | 136966-83-1 | 14863073  | CSDB  |
|   |     |             |                                        | 3-(p-hydroxybenzyl)-4-methoxy-9,10-dihydrophenanthrene                    | NA    | NA   | 133740-29-1 | NA        | CSDB  |
|   |     |             |                                        | 1-p-hydroxybenzyl-4-methoxyphenanthrene-2,7-diol                          | NA    | NA   | NA          | NA        | CSDB  |
|   |     |             |                                        | p-hydroxybenzoic acid                                                     | NA    | NA   | 99-96-7     | 135       | CSDB  |
|   |     |             |                                        | p-hydroxybenzaldehyde                                                     | 29.98 | 0.02 | 123-08-0    | 126       | CSDB  |
|   |     |             |                                        | cinnamic acid                                                             | 19.68 | 0.03 | 621-82-9    | 444539    | CSDB  |
|   |     |             |                                        | protocatechuic acid                                                       | 25.37 | 0.04 | 99-50-3     | 72        | CSDB  |
|   |     |             |                                        | bletlo B                                                                  | NA    | NA   | 147235-17-4 | NA        | CSDB  |
|   |     |             |                                        | bletlo C                                                                  | NA    | NA   | 147235-18-5 | 102121478 | CSDB  |
|   |     |             |                                        | blestrin B                                                                | 0.9   | 0.63 | 128700-06-1 | 14583572  | CSDB  |
|   |     |             |                                        | blestrin C                                                                | NA    | NA   | 145701-18-4 | 101636138 | CSDB  |
|   |     |             |                                        | blestrin D                                                                | NA    | NA   | NA          | 101634591 | CSDB  |
|   |     |             |                                        | blestriarene B                                                            | 16.11 | 0.67 | 127211-03-4 | 442695    | CSDB  |
|   |     |             |                                        | blestriarene C                                                            | 35.22 | 0.67 | 126721-54-8 | 9982511   | CSDB  |
|   |     |             |                                        | blestrianol B                                                             | NA    | NA   | 136966-84-2 | 14863075  | CSDB  |
|   |     |             |                                        | blestrianol C                                                             | 22.22 | 0.27 | 136966-85-3 | 14863077  | CSDB  |
|   |     |             |                                        | 2,7-dihydroxy-1-(4'-hydroxybenzyl)-9,10-dihydrophenanthrene               | NA    | NA   | NA          | NA        | CSDB  |
|   |     |             |                                        | bletilla-mannan                                                           | NA    | NA   | NA          | NA        | CSDB  |
|   |     |             |                                        | 1,6-bis(4-hydroxybenzyl)-4-methoxy-9,10-dihydrophenanthrene               | NA    | NA   | NA          | 14630663  | TCMID |
|   |     |             |                                        | 1,8-bis(4-hydroxybenzyl)-4-methoxyphenanthrene-2,7-diol                   | 13.93 | 0.94 | NA          | 14863079  | TCMID |
|   |     |             |                                        | 1-p-hydroxybenzyl-4-methoxyphenanthrene-2,7-diol                          | NA    | NA   | NA          | 14630664  | TCMID |
|   |     |             |                                        | 2,4,7-trimethoxy-9,10-dihydrophenanthrene                                 | 17.88 | 0.23 | NA          | 15693458  | TCMID |
|   |     |             |                                        | 2,4,7-trimethoxyphenanthrene                                              | 14.5  | 0.23 | NA          | 15693458  | TCMID |
|   |     |             |                                        | 2,6-bis(p-hydroxybenzyl)-3,5-dimethoxy-3-hydroxybibenzyl                  | NA    | NA   | NA          | 87579315  | TCMID |
|   |     |             |                                        | 3,3',5-trimethoxybibenzyl                                                 | 7.83  | 0.14 | 56684-87-8  | 442711    | TCMID |
|   |     |             |                                        | 3,5,3',5'-trimethoxybibenzyl                                              | 63.21 | 0.16 | NA          | 15693460  | TCMID |
|   |     |             |                                        | 3-(p-hydroxybenzyl)-4-methoxy-9,10-dihydrophenanthrene                    | 37.98 | 0.55 | NA          | 14630662  | TCMID |
|   |     |             |                                        | 5-hydroxy-4-(p-hydroxybenzyl)-3,5-dimethoxyphenanthrene                   | NA    | NA   | NA          | NA        | TCMID |
|   |     |             |                                        | amylum                                                                    | NA    | NA   | NA          | 24836924  | TCMID |
|   |     |             |                                        | batatasin III                                                             | 3.75  | 0.12 | 56684-87-8  | 10466989  | TCMID |
|   |     |             |                                        | blespirol                                                                 | NA    | NA   | NA          | 102440970 | TCMID |
|   |     |             |                                        | blestrianol                                                               | 22.22 | 0.27 | NA          | 14863077  | TCMID |
|   |     |             |                                        | blestrianol b                                                             | NA    | NA   | NA          | 14863075  | TCMID |
|   |     |             |                                        | blestrianol c                                                             | NA    | NA   | NA          | 14863077  | TCMID |
|   |     |             |                                        | blestriarene                                                              | 23.01 | 0.67 | NA          | 11317652  | TCMID |
|   |     |             |                                        | blestriarene b                                                            | 16.11 | 0.67 | 127211-03-4 | 442695    | TCMID |
|   |     |             |                                        | blestriarene c                                                            | 16.11 | 0.67 | 127211-03-5 | 442695    | TCMID |
|   |     |             |                                        | blestrin                                                                  | NA    | NA   | NA          | 101636138 | TCMID |
|   |     |             |                                        | blestrin b                                                                | 0.9   | 0.63 | NA          | 14583572  | TCMID |
|   |     |             |                                        | blestrin c                                                                | NA    | NA   | NA          | NA        | TCMID |
|   |     |             |                                        | blestrin d                                                                | NA    | NA   | NA          | NA        | TCMID |
|   |     |             |                                        | bletilla mannan                                                           | NA    | NA   | NA          | NA        | TCMID |
|   |     |             |                                        | bletilol                                                                  | NA    | NA   | NA          | 102121478 | TCMID |
|   |     |             |                                        | bletilol b                                                                | NA    | NA   | NA          | 101688453 | TCMID |
|   |     |             |                                        | bletilol c                                                                | NA    | NA   | NA          | 102121478 | TCMID |
|   |     |             |                                        | methylbenzene                                                             | NA    | NA   | NA          | 5150539   | TCMID |
| 6 | 制草乌 | Zhicaoou    | <i>Aconiti Kusnezoffii Radix Cocta</i> | aconitine                                                                 | NA    | NA   | NA          | 54742366  | TCMID |
|   |     |             |                                        | atisine                                                                   | NA    | NA   | NA          | 44152935  | TCMID |
|   |     |             |                                        | mesaconitine                                                              | NA    | NA   | NA          | 53399190  | TCMID |
| 7 | 白扁豆 | Baibian dou | <i>Lablab Semen Album</i>              | beta-carotene                                                             | 37.18 | 0.58 | 7235-40-7   | 5280489   | TCMSP |
|   |     |             |                                        | behenic acid                                                              | NA    | NA   | 112-85-6    | 8215      | CSDB  |

|   |     |           |                           |                                                   |       |      |             |           |       |
|---|-----|-----------|---------------------------|---------------------------------------------------|-------|------|-------------|-----------|-------|
|   |     |           |                           | arachidic acid                                    | 16.66 | 0.14 | 506-30-9    | 10467     | CSDB  |
|   |     |           |                           | stachyose                                         | 3.25  | 0.59 | 470-55-3    | 439531    | CSDB  |
|   |     |           |                           | elaïdic acid                                      | 33.13 | 0.14 | 112-79-8    | 637517    | CSDB  |
|   |     |           |                           | methionine                                        | NA    | NA   | 59-51-8     | 876       | CSDB  |
|   |     |           |                           | linoleic acid                                     | 41.9  | 0.14 | 60-33-3     | 5280450   | CSDB  |
|   |     |           |                           | maltose                                           | 1.8   | 0.24 | 69-79-4     | 6255      | CSDB  |
|   |     |           |                           | threonine                                         | NA    | NA   | 72-19-5     | 6288      | CSDB  |
|   |     |           |                           | pipecolic acid                                    | NA    | NA   | 535-75-1    | 849       | CSDB  |
|   |     |           |                           | leucine                                           | NA    | NA   | 61-90-5     | 6106      | CSDB  |
|   |     |           |                           | trigoneline                                       | NA    | NA   | 535-83-1    | 5570      | CSDB  |
|   |     |           |                           | glucose                                           | NA    | NA   | NA          | 5793      | CSDB  |
|   |     |           |                           | raffinose                                         | 11.79 | 0.66 | 512-69-6    | 439242    | CSDB  |
|   |     |           |                           | sucrose                                           | 7.17  | 0.23 | NA          | 5988      | CSDB  |
|   |     |           |                           | docosanoic acid                                   | 15.69 | 0.26 | 112-85-6    | 8215      | CSDB  |
|   |     |           |                           | lectin                                            | NA    | NA   | 8189-69-3   | NA        | CSDB  |
|   |     |           |                           | l-pipecilic acid                                  | NA    | NA   | NA          | NA        | TCMID |
|   |     |           |                           | phytin                                            | NA    | NA   | NA          | 44630435  | TCMID |
|   |     |           |                           | phytoagglutinin                                   | NA    | NA   | NA          | NA        | TCMID |
|   |     |           |                           | pipecolic acid                                    | NA    | NA   | NA          | 10796770  | TCMID |
|   |     |           |                           | raffinose                                         | NA    | NA   | NA          | 11005647  | TCMID |
|   |     |           |                           | stachyose                                         | NA    | NA   | NA          | 19706252  | TCMID |
| 8 | 金果榄 | Jinguolan | <i>Tinosporae Radix</i>   | stepharanine                                      | 77.79 | 0.54 | 17369-30-1  | 10358881  | CSDB  |
|   |     |           |                           | magnoflorine                                      | 0.48  | 0.55 | 2141-09-5   | 73337     | CSDB  |
|   |     |           |                           | palmatine                                         | 64.6  | 0.65 | 3486-67-7   | 19009     | CSDB  |
|   |     |           |                           | dehydrodiscretamine                               | NA    | NA   | NA          | 102316663 | CSDB  |
|   |     |           |                           | 2-deoxycurstedysone                               | NA    | NA   | NA          | NA        | CSDB  |
|   |     |           |                           | 2-deoxycurstedysone-3-O-β-glucopyranoside         | NA    | NA   | NA          | NA        | CSDB  |
|   |     |           |                           | 2-deoxy-3-epicrustedysone                         | NA    | NA   | 22785-88-2  | 11812630  | CSDB  |
|   |     |           |                           | isocolumbin                                       | NA    | NA   | 471-54-5    | 24721165  | CSDB  |
|   |     |           |                           | columbin                                          | NA    | NA   | 546-97-4    | 188289    | CSDB  |
|   |     |           |                           | columbamine                                       | 26.94 | 0.59 | 3621-36-1   | 72310     | CSDB  |
|   |     |           |                           | tinocide                                          | NA    | NA   | 105661-47-0 | 184514    | CSDB  |
|   |     |           |                           | jatrorrhizine                                     | 19.65 | 0.59 | 3621-38-3   | 72323     | CSDB  |
|   |     |           |                           | menisperine                                       | 26.17 | 0.59 | NA          | 161487    | CSDB  |
|   |     |           |                           | 20β- hydroxy ecdysone                             | 5.3   | 0.82 | 5289-74-7   | 5459840   | TCMID |
|   |     |           |                           | 20β- hydroxy ecdysone-2-O-β- glucoside            | NA    | NA   | NA          | NA        | TCMID |
|   |     |           |                           | columbamine                                       | 26.94 | 0.59 | 3621-36-1   | 72310     | TCMID |
|   |     |           |                           | Columbamine bitter elements                       | NA    | NA   | NA          | NA        | TCMID |
|   |     |           |                           | columbin                                          | NA    | NA   | NA          | 10406089  | TCMID |
|   |     |           |                           | daucosterol                                       | NA    | NA   | NA          | 52940117  | TCMID |
|   |     |           |                           | isocolumbin                                       | NA    | NA   | NA          | 46173925  | TCMID |
|   |     |           |                           | jatrorrhizine                                     | NA    | NA   | NA          | 5459338   | TCMID |
|   |     |           |                           | Jinguolan glycosides                              | NA    | NA   | NA          | NA        | TCMID |
|   |     |           |                           | l-tetrahadropalmatine                             | NA    | NA   | NA          | NA        | TCMID |
|   |     |           |                           | Palm acid                                         | NA    | NA   | NA          | NA        | TCMID |
|   |     |           |                           | palmatine                                         | NA    | NA   | NA          | 200119    | TCMID |
|   |     |           |                           | palmaturbine                                      | NA    | NA   | NA          | 10547386  | TCMID |
|   |     |           |                           | tinoporine                                        | NA    | NA   | NA          | 442068    | TCMID |
|   |     |           |                           | tinyatoxin                                        | NA    | NA   | NA          | 9916705   | TCMID |
|   |     |           |                           | β-sitosterol                                      | 36.91 | 0.75 | 83-46-5     | 222284    | TCMID |
| 9 | 使君子 | Shijunzi  | <i>Quisqualis Fructus</i> | ellagic acid                                      | 43.06 | 0.43 | 476-66-4    | NA        | TCMSP |
|   |     |           |                           | 1-LINOLEOYL-3-PALMITOYL-RAC-GLYCEROL              | 33.86 | 0.41 | 99032-71-0  | NA        | TCMSP |
|   |     |           |                           | arachidonic acid                                  | 45.57 | 0.2  | 93444-49-6  | 444899    | TCMSP |
|   |     |           |                           | Mairin                                            | 55.38 | 0.78 | 472-15-1    | 64971     | TCMSP |
|   |     |           |                           | Stigmasterol                                      | 43.83 | 0.76 | 83-48-7     | 5280794   | TCMSP |
|   |     |           |                           | succinic acid                                     | 29.62 | 0.01 | 110-15-6    | 1110      | CSDB  |
|   |     |           |                           | D-mannitol                                        | 17.73 | 0.03 | 69-65-8     | 6251      | CSDB  |
|   |     |           |                           | linoleic acid                                     | 41.9  | 0.14 | 60-33-3     | 5280450   | CSDB  |
|   |     |           |                           | malic acid                                        | NA    | NA   | 617-48-1    | 525       | CSDB  |
|   |     |           |                           | quisqualic acid                                   | NA    | NA   | NA          | 40539     | CSDB  |
|   |     |           |                           | potassium quisqualate                             | NA    | NA   | NA          | NA        | CSDB  |
|   |     |           |                           | citric acid                                       | NA    | NA   | 77-92-9     | 311       | CSDB  |
|   |     |           |                           | sucrose                                           | 7.17  | 0.23 | NA          | 5988      | CSDB  |
|   |     |           |                           | D-glucose                                         | NA    | NA   | NA          | 5793      | CSDB  |
|   |     |           |                           | phytosterol                                       | NA    | NA   | NA          | NA        | CSDB  |
|   |     |           |                           | (+)- camphor                                      | NA    | NA   | NA          | 9543187   | TCMID |
|   |     |           |                           | 1,2,4- triethenyl- Cyclohexane                    | NA    | NA   | NA          | 570705    | TCMID |
|   |     |           |                           | 1,6- Dimethylnaphthalene                          | 11.69 | 0.05 | 575-43-9    | 11328     | TCMID |
|   |     |           |                           | 1,7- dimethyl-Naphthalene                         | 20.83 | 0.05 | 575-37-1    | 11326     | TCMID |
|   |     |           |                           | 1- Cyclohexylnonene                               | NA    | NA   | NA          | 5364533   | TCMID |
|   |     |           |                           | 1- isopropyl- 2- methylbenzene                    | 51.89 | 0.02 | 1329-98-2   | 10703     | TCMID |
|   |     |           |                           | 1- Nonanal                                        | 40.28 | 0.02 | 75718-12-6  | 31289     | TCMID |
|   |     |           |                           | 2,2,4,6,6- pentamethyl- Heptane                   | NA    | NA   | NA          | 26058     | TCMID |
|   |     |           |                           | 2,6,10- trimethyl-Dodecane                        | NA    | NA   | NA          | 90476945  | TCMID |
|   |     |           |                           | 2- Methyldecane                                   | NA    | NA   | NA          | 23415     | TCMID |
|   |     |           |                           | 2- Methylnaphthalene                              | 33.69 | 0.04 | 7419-61-6   | 7055      | TCMID |
|   |     |           |                           | 3,3&#39;,4&#39;-tri-O-methylellagic acid          | NA    | NA   | NA          | NA        | TCMID |
|   |     |           |                           | 3,3&#39;,4&#39;-tri-O-methylellagic acid-4-O-β-D- | NA    | NA   | NA          | NA        | TCMID |
|   |     |           |                           | 3,3&#39;-di-O-methylellagic acid                  | NA    | NA   | NA          | 5488919   | TCMID |
|   |     |           |                           | 3,8- dimethyl-Decane                              | NA    | NA   | NA          | NA        | TCMID |
|   |     |           |                           | 3- methyl-Heneicosane                             | NA    | NA   | NA          | NA        | TCMID |
|   |     |           |                           | 3- methyl-Undecane                                | NA    | NA   | NA          | NA        | TCMID |
|   |     |           |                           | 3-O-methylellagic acid-4&#39;-O-β-D-xylopyroside  | NA    | NA   | NA          | 102030909 | TCMID |
|   |     |           |                           | 3-O-methylellagic acid-3&#39;-O-β-D-xylopyroside  | NA    | NA   | NA          | NA        | TCMID |
|   |     |           |                           | 4,8- dimethyl-Undecane                            | NA    | NA   | NA          | NA        | TCMID |
|   |     |           |                           | 5,7- dimethyl-Undecane                            | NA    | NA   | NA          | NA        | TCMID |
|   |     |           |                           | 7α,21s,25-trihydroxy-3β-acetoxy-21s,23r-epox      | NA    | NA   | NA          | 5322043   | TCMID |
|   |     |           |                           | benzothiazole                                     | NA    | NA   | NA          | 384525    | TCMID |
|   |     |           |                           | brevifolin                                        | NA    | NA   | NA          | 10131135  | TCMID |
|   |     |           |                           | cis, trans- 2,9- Dimethylspiro [ 5 . 5 ] undecane | NA    | NA   | NA          | NA        | TCMID |
|   |     |           |                           | clerosteorl                                       | NA    | NA   | NA          | NA        | TCMID |
|   |     |           |                           | clerosterol-3-O-β-D-glucopyranoside               | NA    | NA   | NA          | NA        | TCMID |
|   |     |           |                           | Decahydro- 4,4,8,9,10- pentamethylnaphthalene     | NA    | NA   | NA          | NA        | TCMID |
|   |     |           |                           | decanal                                           | 29.81 | 0.02 | 112-31-2    | 8175      | TCMID |
|   |     |           |                           | diethyl phthalate                                 | 52.19 | 0.07 | 68988-18-1  | 6781      | TCMID |
|   |     |           |                           | dodecane                                          | NA    | NA   | NA          | 5359624   | TCMID |
|   |     |           |                           | heptadecane                                       | 8.64  | 0.07 | 629-78-7    | 12398     | TCMID |
|   |     |           |                           | isothiocyanato-Cyclohexane                        | NA    | NA   | NA          | 14289     | TCMID |
|   |     |           |                           | lauric aldehyde                                   | 21.52 | 0.03 | 112-54-9    | 8194      | TCMID |
|   |     |           |                           | methyl palmitate                                  | NA    | NA   | NA          | 10378565  | TCMID |
|   |     |           |                           | methyl tetradecanoate                             | NA    | NA   | NA          | 11779960  | TCMID |
|   |     |           |                           | Nonahexacontanoic acid                            | 53.54 | 0.04 | 40710-32-5  | 38626     | TCMID |
|   |     |           |                           | p- mentha- 1,5- diene                             | NA    | NA   | NA          | NA        | TCMID |
|   |     |           |                           | palmitic acid                                     | NA    | NA   | NA          | 18413781  | TCMID |
|   |     |           |                           | Phytan                                            | NA    | NA   | NA          | 12523     | TCMID |
|   |     |           |                           | potassium quisqualat                              | NA    | NA   | NA          | NA        | TCMID |
|   |     |           |                           | potassium quisqualate                             | NA    | NA   | NA          | NA        | TCMID |
|   |     |           |                           | pristane                                          | NA    | NA   | NA          | 15979     | TCMID |
|   |     |           |                           | quisqualic acid                                   | NA    | NA   | NA          | 40539     | TCMID |
|   |     |           |                           | quisqualic acid                                   | NA    | NA   | NA          | 40539     | TCMID |
|   |     |           |                           | stigmasta-4, 25-dien-3-one                        | NA    | NA   | NA          | 71307334  | TCMID |
|   |     |           |                           | tetradecane                                       | 6.15  | 0.04 | 68855-58-3  | 14260     | TCMID |
|   |     |           |                           | tetradecanoic acid                                | NA    | NA   | NA          | 53435003  | TCMID |
|   |     |           |                           | tetratriacontane                                  | 7.99  | 0.43 | 14167-59-0  | 26519     | TCMID |
|   |     |           |                           | tridecane                                         | 17.15 | 0.02 | 61193-21-3  | 14257     | TCMID |
|   |     |           |                           | trigonelline                                      | NA    | NA   | NA          | 6419886   | TCMID |
|   |     |           |                           | tritriacontane                                    | 7.83  | 0.27 | NA          | 522398    | TCMID |

|                                                       |       |                 |                                    |                                                         |       |      |             |           |       |
|-------------------------------------------------------|-------|-----------------|------------------------------------|---------------------------------------------------------|-------|------|-------------|-----------|-------|
| 10                                                    | 骨碎补   | Gusuibu         | <i>Drynariae Rhizoma</i>           | $\beta$ - Caryophyllene                                 | NA    | NA   | NA          | NA        | TCMID |
|                                                       |       |                 |                                    | (2R)-5,7-dihydroxy-2-(4-hydroxyphenyl)chroman-4-ol      | 42.36 | 0.21 | 480-41-1    | 667495    | TCMSP |
|                                                       |       |                 |                                    | Aureusidin                                              | 53.42 | 0.24 | 38216-54-5  | 5281220   | TCMSP |
|                                                       |       |                 |                                    | Eriodyctiol (flavanone)                                 | 41.35 | 0.24 | 4049-38-1   | 373261    | TCMSP |
|                                                       |       |                 |                                    | Stigmasterol                                            | 43.83 | 0.76 | 83-48-7     | 5280794   | TCMSP |
|                                                       |       |                 |                                    | beta-sitosterol                                         | 36.91 | 0.75 | 83-46-5     | 222284    | TCMSP |
|                                                       |       |                 |                                    | kaempferol                                              | 41.88 | 0.24 | 520-18-3    | 5280863   | TCMSP |
|                                                       |       |                 |                                    | naringenin                                              | 59.29 | 0.21 | 153-18-4    | 439246    | TCMSP |
|                                                       |       |                 |                                    | (+)-catechin                                            | 54.83 | 0.24 | 154-23-4    | 9064      | TCMSP |
|                                                       |       |                 |                                    | eriodictyol                                             | 71.79 | 0.24 | 552-58-9    | 440735    | TCMSP |
|                                                       |       |                 |                                    | digallate                                               | 61.85 | 0.26 | 536-08-3    | 341       | TCMSP |
|                                                       |       |                 |                                    | luteolin                                                | 36.16 | 0.25 | 491-70-3    | 5280445   | TCMSP |
|                                                       |       |                 |                                    | 22-Stigmasten-3-one                                     | 39.25 | 0.76 | NA          | NA        | TCMSP |
|                                                       |       |                 |                                    | Cyclolaudenol acetate                                   | 41.66 | 0.79 | NA          | NA        | TCMSP |
|                                                       |       |                 |                                    | cycloartenone                                           | 40.57 | 0.79 | 511-63-7    | NA        | TCMSP |
|                                                       |       |                 |                                    | cyclolaudenol                                           | 39.05 | 0.79 | 511-61-5    | NA        | TCMSP |
|                                                       |       |                 |                                    | davallioside A qt                                       | 62.65 | 0.51 | NA          | NA        | TCMSP |
|                                                       |       |                 |                                    | marioside qt                                            | 70.79 | 0.19 | 146713-93-1 | NA        | TCMSP |
|                                                       |       |                 |                                    | xanthogalenol                                           | 41.08 | 0.32 | NA          | 14309735  | TCMSP |
|                                                       |       |                 |                                    | 7-fernene                                               | 7.03  | 0.77 | 1615-98-1   | 13857703  | CSDB  |
|                                                       |       |                 |                                    | fern-9(11)-ene                                          | 6.96  | 0.77 | 1615-99-2   | 441679    | CSDB  |
|                                                       |       |                 |                                    | stigmasterol                                            | 43.83 | 0.76 | 83-48-7     | 5280794   | CSDB  |
|                                                       |       |                 |                                    | hop-21-ene                                              | NA    | NA   | 1615-92-5   | 12310623  | CSDB  |
|                                                       |       |                 |                                    | $\beta$ -sitosterol                                     | 36.91 | 0.75 | 83-46-5     | 222284    | CSDB  |
|                                                       |       |                 |                                    | cycloartenyl acetate                                    | NA    | NA   | 1259-10-5   | 13023741  | CSDB  |
|                                                       |       |                 |                                    | cyclomargenyl acetate                                   | NA    | NA   | NA          | 101615127 | CSDB  |
|                                                       |       |                 |                                    | 9,10-cyclolanost-25-en-3 $\beta$ -yl acetate            | NA    | NA   | NA          | NA        | CSDB  |
|                                                       |       |                 |                                    | cyclolaudenyl acetate                                   | NA    | NA   | NA          | 14312790  | CSDB  |
|                                                       |       |                 |                                    | naringin                                                | 6.92  | 0.78 | 10236-47-2  | 442428    | CSDB  |
|                                                       |       |                 |                                    | campesterol                                             | 37.58 | 0.71 | 474-62-4    | 173183    | CSDB  |
|                                                       |       |                 |                                    | filic-3-ene                                             | 6.81  | 0.76 | 2472-29-9   | 12309888  | CSDB  |
|                                                       |       |                 |                                    | neohop-13(18)-ene                                       | 6.78  | 0.77 | 21681-17-4  | 12310619  | CSDB  |
|                                                       |       |                 |                                    | (7cR,8c s)-dihydro-dehydrogenation of coniferyl alcohol | NA    | NA   | NA          | NA        | TCMID |
|                                                       |       |                 |                                    | (E)-p- Pine needle acid- beta- B- pyrazole Goaded by    | NA    | NA   | NA          | NA        | TCMID |
|                                                       |       |                 |                                    | 2,6-dimethoxy-p-cresol                                  | NA    | NA   | NA          | 240925    | TCMID |
|                                                       |       |                 |                                    | 2,6-dimethoxy-phenol                                    | 37.5  | 0.03 | 91-10-1     | 7041      | TCMID |
|                                                       |       |                 |                                    | 2-furancarboxylic acid                                  | NA    | NA   | NA          | 5460151   | TCMID |
|                                                       |       |                 |                                    | 2-methyl Furoate                                        | NA    | NA   | NA          | NA        | TCMID |
|                                                       |       |                 |                                    | 3- acetamide 4- Hydroxy benzoic acid and 5- ethyl- 2-   | NA    | NA   | NA          | NA        | TCMID |
|                                                       |       |                 |                                    | 3-Hydroxy-methyl Furoate                                | NA    | NA   | NA          | NA        | TCMID |
|                                                       |       |                 |                                    | 5-hydroxymethyl furaldehyde                             | NA    | NA   | NA          | NA        | TCMID |
|                                                       |       |                 |                                    | afzelechin                                              | NA    | NA   | NA          | 9943440   | TCMID |
|                                                       |       |                 |                                    | benzoic acid                                            | NA    | NA   | NA          | 11107141  | TCMID |
|                                                       |       |                 |                                    | caffeic acid                                            | NA    | NA   | NA          | 54710367  | TCMID |
|                                                       |       |                 |                                    | campesterol                                             | NA    | NA   | NA          | 51051617  | TCMID |
|                                                       |       |                 |                                    | campesteryl ferulate                                    | NA    | NA   | NA          | 15056832  | TCMID |
|                                                       |       |                 |                                    | chiralone                                               | 17.76 | 0.63 | 58274-95-6  | 633072    | TCMID |
|                                                       |       |                 |                                    | cinnamic acid                                           | NA    | NA   | NA          | 6857483   | TCMID |
|                                                       |       |                 |                                    | cyclolaudenol                                           | NA    | NA   | NA          | 5460418   | TCMID |
|                                                       |       |                 |                                    | daucosterol                                             | NA    | NA   | NA          | 52940117  | TCMID |
|                                                       |       |                 |                                    | Deciduous pine plain 4c-O-B-D--pyran-glucoside          | NA    | NA   | NA          | NA        | TCMID |
|                                                       |       |                 |                                    | Dicatechin                                              | NA    | NA   | NA          | NA        | TCMID |
|                                                       |       |                 |                                    | dihydrocaffeic acid                                     | 32.79 | 0.05 | 71693-95-3  | 348154    | TCMID |
|                                                       |       |                 |                                    | Dihydrogen ferulic acid                                 | NA    | NA   | NA          | NA        | TCMID |
|                                                       |       |                 |                                    | Diplopterol                                             | 11.25 | 0.77 | 1721-59-1   | 164874    | TCMID |
|                                                       |       |                 |                                    | dryocrossol                                             | NA    | NA   | NA          | 11453141  | TCMID |
|                                                       |       |                 |                                    | epicatechin                                             | NA    | NA   | NA          | 255538    | TCMID |
|                                                       |       |                 |                                    | epigallocatechin                                        | NA    | NA   | NA          | 10425234  | TCMID |
|                                                       |       |                 |                                    | erioctrin                                               | NA    | NA   | NA          | NA        | TCMID |
|                                                       |       |                 |                                    | eriodictyol                                             | NA    | NA   | NA          | 25200419  | TCMID |
|                                                       |       |                 |                                    | Fern-9-(11)-ene                                         | 6.96  | 0.77 | 1615-99-2   | 441679    | TCMID |
| ferulic acid                                          | NA    | NA              | NA                                 | 54691413                                                | TCMID |      |             |           |       |
| Ferulic acid- beta- D- Pyran glycosidase(E)- 4- O- Be | NA    | NA              | NA                                 | NA                                                      | TCMID |      |             |           |       |
| Flavanols                                             | NA    | NA              | NA                                 | 5284506                                                 | TCMID |      |             |           |       |
| gamma-sitosterol                                      | NA    | NA              | NA                                 | 636741                                                  | TCMID |      |             |           |       |
| He Beiguan acetate                                    | NA    | NA              | NA                                 | NA                                                      | TCMID |      |             |           |       |
| He Pa-21-en                                           | NA    | NA              | NA                                 | NA                                                      | TCMID |      |             |           |       |
| hesperidin                                            | NA    | NA              | NA                                 | 53477767                                                | TCMID |      |             |           |       |
| hop-21-ene                                            | NA    | NA              | NA                                 | 12310623                                                | TCMID |      |             |           |       |
| kaempferol                                            | NA    | NA              | NA                                 | 25202062                                                | TCMID |      |             |           |       |
| kurarinone                                            | 0.96  | 0.63            | 34981-26-5                         | 11982640                                                | TCMID |      |             |           |       |
| luteolin                                              | NA    | NA              | NA                                 | 25201972                                                | TCMID |      |             |           |       |
| naringenin                                            | 42.36 | 0.21            | 480-41-1                           | 667495                                                  | TCMID |      |             |           |       |
| naringin                                              | NA    | NA              | NA                                 | 45358136                                                | TCMID |      |             |           |       |
| narirutin                                             | NA    | NA              | NA                                 | 42607901                                                | TCMID |      |             |           |       |
| O-hydroquinone                                        | 29.86 | 0.02            | 37349-32-9                         | 289                                                     | TCMID |      |             |           |       |
| PA-22(29)-                                            | NA    | NA              | NA                                 | NA                                                      | TCMID |      |             |           |       |
| protocatechuic acid                                   | NA    | NA              | NA                                 | 54675866                                                | TCMID |      |             |           |       |
| Ring Lawton aldehyde                                  | NA    | NA              | NA                                 | NA                                                      | TCMID |      |             |           |       |
| stigmasterol                                          | NA    | NA              | NA                                 | 50930798                                                | TCMID |      |             |           |       |
| stigmasterol-beta-d-glucoside                         | NA    | NA              | NA                                 | 70699355                                                | TCMID |      |             |           |       |
| the Coffee acid sodium                                | NA    | NA              | NA                                 | NA                                                      | TCMID |      |             |           |       |
| Vanillic acid- 4- O- beta- D- Pyran glycosidase       | NA    | NA              | NA                                 | NA                                                      | TCMID |      |             |           |       |
| White acrylic                                         | NA    | NA              | NA                                 | 23954                                                   | TCMID |      |             |           |       |
| $\beta$ -sitosterol                                   | 36.91 | 0.75            | 83-46-5                            | 222284                                                  | TCMID |      |             |           |       |
| NA                                                    | NA    | NA              | NA                                 | NA                                                      | TCMID |      |             |           |       |
| 11                                                    | 山香圆叶  | Shanxiangyuanye | <i>Turpiniae Folium</i>            | NA                                                      | NA    | NA   | NA          | TCMID     |       |
| 12                                                    | 防己    | Fangji          | <i>Stephaniae Tetrandrae Radix</i> | Tetraneurin A                                           | 35.4  | 0.31 | 22621-72-3  | 174868    | TCMSP |
|                                                       |       |                 |                                    | Hesperetin                                              | 70.31 | 0.27 | 520-33-2    | 72281     | TCMSP |
|                                                       |       |                 |                                    | beta-sitosterol                                         | 36.91 | 0.75 | 83-46-5     | 222284    | TCMSP |
|                                                       |       |                 |                                    | 2,2'-N,N-dichloromethyltetrandrine                      | NA    | NA   | 136055-61-3 | 5316651   | CSDB  |
|                                                       |       |                 |                                    | berbamine                                               | NA    | NA   | 478-61-5    | 275182    | CSDB  |
|                                                       |       |                 |                                    | fangchinoline                                           | NA    | NA   | NA          | 73481     | CSDB  |
|                                                       |       |                 |                                    | stephanthrine                                           | NA    | NA   | NA          | 161379    | CSDB  |
|                                                       |       |                 |                                    | cyclanoline                                             | 2.64  | 0.57 | NA          | 3082134   | CSDB  |
|                                                       |       |                 |                                    | oxofangchitine                                          | NA    | NA   | 102516-53-0 | 128108    | CSDB  |
|                                                       |       |                 |                                    | tetrandrine                                             | NA    | NA   | NA          | 73078     | CSDB  |
|                                                       |       |                 |                                    | fenfangine A                                            | NA    | NA   | 115556-32-6 | 102121497 | CSDB  |
|                                                       |       |                 |                                    | fenfangine B                                            | NA    | NA   | 115648-96-9 | 102121498 | CSDB  |
|                                                       |       |                 |                                    | fenfangine C                                            | NA    | NA   | 115648-97-0 | 102121829 | CSDB  |
|                                                       |       |                 |                                    | fenfangine D                                            | NA    | NA   | 115439-62-8 | NA        | CSDB  |
|                                                       |       |                 |                                    | (+)-2-n-methylfangchinoline                             | NA    | NA   | NA          | 5319655   | TCMID |
|                                                       |       |                 |                                    | (+)-2-n-methyltetrandrine                               | NA    | NA   | NA          | 5319785   | TCMID |
|                                                       |       |                 |                                    | 2,2',2''-n-dichloromethyltetrandrine                    | 12.63 | 0.55 | 88509-91-5  | 5316651   | TCMID |
|                                                       |       |                 |                                    | 2,2,2-triethoxyl-ethanol                                | 33.73 | 0.03 | NA          | 5322034   | TCMID |
|                                                       |       |                 |                                    | 5-methyl-1,2,3,4-tetrathiane                            | NA    | NA   | NA          | 5319787   | TCMID |
|                                                       |       |                 |                                    | 9-oxofarnesol                                           | 58.75 | 0.07 | NA          | 5320326   | TCMID |
|                                                       |       |                 |                                    | berberine                                               | NA    | NA   | NA          | 10246509  | TCMID |
|                                                       |       |                 |                                    | beta-clemene                                            | 25.63 | 0.06 | 122-78-1    | 6918391   | TCMID |
|                                                       |       |                 |                                    | cissamine                                               | NA    | NA   | NA          | 9884460   | TCMID |
|                                                       |       |                 |                                    | cissampareine                                           | NA    | NA   | NA          | 5351601   | TCMID |
|                                                       |       |                 |                                    | cyclanoline                                             | 2.64  | 0.57 | NA          | 3082134   | TCMID |
|                                                       |       |                 |                                    | cycleaneonine                                           | NA    | NA   | NA          | 159552    | TCMID |
|                                                       |       |                 |                                    | demethyltetrandrine                                     | NA    | NA   | NA          | 102148207 | TCMID |
|                                                       |       |                 |                                    | dichotomitin                                            | 12.63 | 0.55 | 88509-91-5  | 5316653   | TCMID |
|                                                       |       |                 |                                    | fangchinoline                                           | NA    | NA   | NA          | 5458555   | TCMID |
|                                                       |       |                 |                                    | faradiol                                                | NA    | NA   | NA          | 5317314   | TCMID |
|                                                       |       |                 |                                    | fenfangine                                              | NA    | NA   | NA          | 5317331   | TCMID |

|    |     |             |                                      |                                                      |       |      |             |           |       |
|----|-----|-------------|--------------------------------------|------------------------------------------------------|-------|------|-------------|-----------|-------|
|    |     |             |                                      | fentifangine d                                       | NA    | NA   | NA          | NA        | TCMID |
|    |     |             |                                      | feralolide                                           | 1.37  | 0.39 | NA          | 5317333   | TCMID |
|    |     |             |                                      | hanfangchin                                          | NA    | NA   | NA          | 73078     | TCMID |
|    |     |             |                                      | jatrorrhizine                                        | NA    | NA   | NA          | 5459338   | TCMID |
|    |     |             |                                      | javanicin                                            | 22.36 | 0.2  | 476-45-9    | 10149     | TCMID |
|    |     |             |                                      | menisidine                                           | NA    | NA   | NA          | 73481     | TCMID |
|    |     |             |                                      | menisine                                             | NA    | NA   | NA          | 5351212   | TCMID |
|    |     |             |                                      | menisperine                                          | 26.17 | 0.59 | 17669-18-0  | 161487    | TCMID |
|    |     |             |                                      | n-methylflindersine                                  | 32.36 | 0.18 | 50333-13-6  | 72819     | TCMID |
|    |     |             |                                      | oxofangchirine                                       | NA    | NA   | NA          | 128108    | TCMID |
|    |     |             |                                      | palmatine                                            | NA    | NA   | NA          | 200119    | TCMID |
|    |     |             |                                      | stephadione                                          | NA    | NA   | NA          | NA        | TCMID |
|    |     |             |                                      | stephflavone                                         | NA    | NA   | NA          | 5324248   | TCMID |
|    |     |             |                                      | stephflavone b                                       | NA    | NA   | NA          | 5324248   | TCMID |
|    |     |             |                                      | stephanthrine                                        | NA    | NA   | NA          | 161379    | TCMID |
|    |     |             |                                      | stepharine                                           | NA    | NA   | NA          | 830726    | TCMID |
|    |     |             |                                      | tetrandrine                                          | NA    | NA   | NA          | 53399220  | TCMID |
|    |     |             |                                      | tetraneurin                                          | 35.4  | 0.31 | 22621-72-3  | 174868    | TCMID |
| 13 | 皂角刺 | Zaojiaoci   | <i>Gleditsiae Spina</i>              | 2-aminoimidazole                                     | 90.9  | 0.01 | 7720-39-0   | 82140     | TCMID |
|    |     |             |                                      | 3-O-caffeoylquinic acid methyl ester                 | 9.97  | 0.36 | NA          | 6476139   | TCMID |
|    |     |             |                                      | 3-O-trans-feruloylquinic acid                        | NA    | NA   | NA          | 101088581 | TCMID |
|    |     |             |                                      | 4-hydroxy-3-methoxybenzamide                         | NA    | NA   | NA          | 354088    | TCMID |
|    |     |             |                                      | 5,7-dihydroxy-chromone                               | NA    | NA   | NA          | NA        | TCMID |
|    |     |             |                                      | E-cinnamic acid                                      | 19.68 | 0.03 | 621-82-9    | 444539    | TCMID |
|    |     |             |                                      | gleditsiasaaponin b-g                                | NA    | NA   | NA          | NA        | TCMID |
|    |     |             |                                      | nonacosane                                           | 8.12  | 0.39 | 630-03-5    | 12409     | TCMID |
|    |     |             |                                      | palmitic acid                                        | NA    | NA   | NA          | 18413781  | TCMID |
|    |     |             |                                      | protocatechuic acid                                  | NA    | NA   | NA          | 54675866  | TCMID |
|    |     |             |                                      | threo-guaiacylglycerol-β-coniferyl aldehyde ether    | NA    | NA   | NA          | NA        | TCMID |
|    |     |             |                                      | trans-caffeic acid                                   | 25.76 | 0.05 | 71693-97-5  | 689043    | TCMID |
|    |     |             |                                      | vanillic acid                                        | NA    | NA   | NA          | 54675858  | TCMID |
| 14 | 关黄柏 | Guanhuangbo | <i>Phellodendri Amurensis Cortex</i> | phellamurin_qt                                       | 56.6  | 0.39 | 52589-11-4  | NA        | TCMSP |
|    |     |             |                                      | berberine                                            | 36.86 | 0.78 | 633-66-9    | NA        | TCMSP |
|    |     |             |                                      | (S)-Canadine                                         | 53.83 | 0.77 | 5096-57-1   | NA        | TCMSP |
|    |     |             |                                      | coptisine                                            | 30.67 | 0.86 | 3486-66-6   | NA        | TCMSP |
|    |     |             |                                      | wogonin                                              | 30.68 | 0.23 | 632-85-9    | 5281703   | TCMSP |
|    |     |             |                                      | poriferast-5-en-3beta-ol                             | 36.91 | 0.75 | 83-46-5     | 457801    | TCMSP |
|    |     |             |                                      | delta7-Dehydrosophoramine                            | 54.45 | 0.25 | NA          | NA        | TCMSP |
|    |     |             |                                      | niloticin                                            | 41.41 | 0.82 | 115404-57-4 | 44559946  | TCMSP |
|    |     |             |                                      | baicalein                                            | 33.52 | 0.21 | 491-67-8    | 5281605   | TCMSP |
|    |     |             |                                      | berberrubine                                         | 35.74 | 0.73 | 15401-69-1  | NA        | TCMSP |
|    |     |             |                                      | beta-sitosterol                                      | 36.91 | 0.75 | 83-46-5     | 222284    | TCMSP |
|    |     |             |                                      | Stigmasterol                                         | 43.83 | 0.76 | 83-48-7     | 5280794   | TCMSP |
|    |     |             |                                      | campest-5-en-3beta-ol                                | 37.58 | 0.71 | 474-62-4    | 173183    | TCMSP |
|    |     |             |                                      | 7-Dehydrosigmasterol                                 | 37.42 | 0.75 | NA          | NA        | TCMSP |
|    |     |             |                                      | Dihydrophelloside_qt                                 | 48.6  | 0.43 | 20194-52-9  | NA        | TCMSP |
|    |     |             |                                      | Amurensine                                           | 49.51 | 0.69 | 10481-92-2  | NA        | TCMSP |
|    |     |             |                                      | dihydroniloticin                                     | 36.43 | 0.82 | 115334-05-9 | NA        | TCMSP |
|    |     |             |                                      | epiberberine                                         | 30.74 | 0.55 | 1816598     | NA        | TCMSP |
|    |     |             |                                      | jatrorrhizine                                        | 30.44 | 0.75 | 3621-38-3   | NA        | TCMSP |
|    |     |             |                                      | melianone                                            | 40.53 | 0.78 | 6553-27-1   | 44575793  | TCMSP |
|    |     |             |                                      | (1S)-1-(4-hydroxybenzyl)-2-methyl-3,4-dihydro-1H-is  | 67.14 | 0.23 | 66277-20-1  | 11426154  | TCMSP |
|    |     |             |                                      | obacunonic acid                                      | 35.59 | 0.51 | 751-29-1    | NA        | TCMSP |
|    |     |             |                                      | obacunone                                            | 81.58 | 0.57 | 751-03-1    | NA        | TCMSP |
|    |     |             |                                      | phellochin                                           | 35.41 | 0.82 | 115334-04-8 | NA        | TCMSP |
|    |     |             |                                      | (2R,3R,8R)-3,5-dihydroxy-2-(4-hydroxyphenyl)-8-iso   | 83.31 | 0.52 | NA          | 10937119  | TCMSP |
|    |     |             |                                      | (13aS)-2,3,10-trimethoxy-6,8,13,13a-tetrahydro-5H-is | 72.65 | 0.59 | 27313-86-6  | 11282465  | TCMSP |
|    |     |             |                                      | tetrahydroreticuline                                 | 87.93 | 0.33 | NA          | 440930    | TCMSP |
|    |     |             |                                      | thalifendine                                         | 44.41 | 0.73 | 18207-71-1  | NA        | TCMSP |
|    |     |             |                                      | palmatine                                            | 64.6  | 0.65 | 3486-67-7   | 19009     | TCMSP |
|    |     |             |                                      | quercetin                                            | 46.43 | 0.28 | 73123-10-1  | 5280343   | TCMSP |
|    |     |             |                                      | piscidinol- A                                        | 28.45 | 0.81 | 100198-09-2 | 12004524  | CSDB  |
|    |     |             |                                      | tetrahydropalmatine                                  | NA    | NA   | 10097-84-4  | 5417      | CSDB  |
|    |     |             |                                      | amurensine                                           | NA    | NA   | 10481-92-2  | 442164    | CSDB  |
|    |     |             |                                      | methylnonyl ketone                                   | 17.66 | 0.03 | 112-12-9    | 8163      | CSDB  |
|    |     |             |                                      | guanidine                                            | 24    | 0    | 113-00-8    | 3520      | CSDB  |
|    |     |             |                                      | phellochin                                           | NA    | NA   | 115334-04-8 | 189290    | CSDB  |
|    |     |             |                                      | dihydroniloticin                                     | NA    | NA   | 115334-05-9 | 73351981  | CSDB  |
|    |     |             |                                      | niloticin                                            | NA    | NA   | 115404-57-4 | 14021529  | CSDB  |
|    |     |             |                                      | niloticin acetate                                    | NA    | NA   | 116425-97-9 | NA        | CSDB  |
|    |     |             |                                      | limonin                                              | NA    | NA   | 1180-71-8   | 179651    | CSDB  |
|    |     |             |                                      | obaculactone                                         | NA    | NA   | 1180-71-8   | 179651    | CSDB  |
|    |     |             |                                      | 24-methylenecycloartanol                             | NA    | NA   | 118628-12-9 | 94204     | CSDB  |
|    |     |             |                                      | myrcene                                              | 24.96 | 0.02 | 123-35-3    | 31253     | CSDB  |
|    |     |             |                                      | tetrahydrojatrorrhizine                              | NA    | NA   | 13063-54-2  | 12304090  | CSDB  |
|    |     |             |                                      | arabinose                                            | NA    | NA   | 147-81-9    | 854       | CSDB  |
|    |     |             |                                      | galacturonic acid                                    | 29.75 | 0.04 | 14982-50-4  | 84740     | CSDB  |
|    |     |             |                                      | berberrubine                                         | NA    | NA   | 17388-19-1  | 72704     | CSDB  |
|    |     |             |                                      | thalifendine                                         | NA    | NA   | 18207-71-1  | 3084288   | CSDB  |
|    |     |             |                                      | nor-icariside                                        | NA    | NA   | 20194-37-0  | NA        | CSDB  |
|    |     |             |                                      | phelloside                                           | NA    | NA   | 20194-51-8  | NA        | CSDB  |
|    |     |             |                                      | dihydrophelloside                                    | NA    | NA   | 20194-52-9  | NA        | CSDB  |
|    |     |             |                                      | magnoflorine                                         | 0.48  | 0.55 | 2141-09-5   | 73337     | CSDB  |
|    |     |             |                                      | phellavin                                            | NA    | NA   | 32507-67-8  | 5320517   | CSDB  |
|    |     |             |                                      | phellatin                                            | NA    | NA   | 32507-68-9  | 5320516   | CSDB  |
|    |     |             |                                      | palmatine                                            | 64.6  | 0.65 | 3486-67-7   | 19009     | CSDB  |
|    |     |             |                                      | columbamine                                          | 26.94 | 0.59 | 3621-36-1   | 72310     | CSDB  |
|    |     |             |                                      | jatrorrhizine                                        | 19.65 | 0.59 | 3621-38-3   | 72323     | CSDB  |
|    |     |             |                                      | phellodendroside                                     | NA    | NA   | 40451-69-2  | 101316827 | CSDB  |
|    |     |             |                                      | campesterol                                          | 37.58 | 0.71 | 474-62-4    | 173183    | CSDB  |
|    |     |             |                                      | hyperoside                                           | 6.94  | 0.77 | 482-36-0    | 5281643   | CSDB  |
|    |     |             |                                      | N-methylflindersine                                  | 32.36 | 0.18 | 50333-13-6  | 72819     | CSDB  |
|    |     |             |                                      | tetrahydroberberine                                  | NA    | NA   | 522-97-4    | 34458     | CSDB  |
|    |     |             |                                      | canadine                                             | NA    | NA   | 522-97-4    | 34458     | CSDB  |
|    |     |             |                                      | phellamurin                                          | 3.58  | 0.84 | 52589-11-4  | 193876    | CSDB  |
|    |     |             |                                      | friedelin                                            | 29.16 | 0.76 | 559-74-0    | 91472     | CSDB  |
|    |     |             |                                      | galactose                                            | NA    | NA   | 59-23-4     | 6036      | CSDB  |
|    |     |             |                                      | amurensin                                            | 3.74  | 0.83 | 641-94-1    | 5318156   | CSDB  |
|    |     |             |                                      | melianone                                            | NA    | NA   | 6553-27-1   | 99981     | CSDB  |
|    |     |             |                                      | candicine                                            | 38.7  | 0.71 | 6656-13-9   | 23135     | CSDB  |
|    |     |             |                                      | evodin                                               | NA    | NA   | 6989-38-4   | 398789    | CSDB  |
|    |     |             |                                      | obacunone                                            | NA    | NA   | 751-03-1    | 119041    | CSDB  |
|    |     |             |                                      | β-sitosterol                                         | 36.91 | 0.75 | 83-46-5     | 222284    | CSDB  |
|    |     |             |                                      | γ-sitosterol                                         | 36.91 | 0.75 | 83-47-6     | 457801    | CSDB  |
|    |     |             |                                      | stigmasterol                                         | 43.83 | 0.76 | 83-48-7     | 5280794   | CSDB  |
|    |     |             |                                      | cneorin NP36                                         | NA    | NA   | 84749-99-5  | 14136871  | CSDB  |
|    |     |             |                                      | 5,5'-dimethylfurfural ether                          | NA    | NA   | NA          | NA        | CSDB  |
|    |     |             |                                      | 4,10-dimethylene-7-isopropyl-5(E)-cyclodecenol       | NA    | NA   | NA          | NA        | CSDB  |
|    |     |             |                                      | hispiol B                                            | NA    | NA   | NA          | NA        | CSDB  |
|    |     |             |                                      | 7-dehydrostigmasterol                                | 13.01 | 0.76 | NA          | 12303924  | CSDB  |
|    |     |             |                                      | herculin                                             | NA    | NA   | NA          | 5318023   | CSDB  |
|    |     |             |                                      | obacunonic acid                                      | NA    | NA   | NA          | NA        | CSDB  |
|    |     |             |                                      | phellodendrine                                       | 2.61  | 0.58 | NA          | 3081405   | CSDB  |
|    |     |             |                                      | rhamnose                                             | NA    | NA   | NA          | 25310     | CSDB  |
|    |     |             |                                      | menisperine                                          | 26.17 | 0.59 | NA          | 161487    | CSDB  |
|    |     |             |                                      | dictamnolide                                         | NA    | NA   | NA          | NA        | CSDB  |
|    |     |             |                                      | 24-methylenecycloartanol <br> 24-methyl-9β,19-cycl   | NA    | NA   | NA          | NA        | CSDB  |

|    |     |           |                     |                                                                                |       |      |             |           |       |
|----|-----|-----------|---------------------|--------------------------------------------------------------------------------|-------|------|-------------|-----------|-------|
|    |     |           |                     | lumicaeruleic acid                                                             | NA    | NA   | NA          | NA        | CSDB  |
|    |     |           |                     | thalphenine                                                                    | NA    | NA   | NA          | NA        | CSDB  |
|    |     |           |                     | $\alpha$ -(1-4)-linked(galactosyluronic acid)galactose                         | NA    | NA   | NA          | NA        | CSDB  |
|    |     |           |                     | 3-o-caffeoylquinic acid                                                        | 11.93 | 0.33 | 202650-88-2 | 1794427   | TCMID |
|    |     |           |                     | 7-dehydrostigmaterol                                                           | NA    | NA   | NA          | 52931386  | TCMID |
|    |     |           |                     | acetic acid                                                                    | NA    | NA   | NA          | 29927927  | TCMID |
|    |     |           |                     | alpha-phellandrene                                                             | NA    | NA   | NA          | 7460      | TCMID |
|    |     |           |                     | amurensin                                                                      | NA    | NA   | NA          | 44258795  | TCMID |
|    |     |           |                     | berberine                                                                      | NA    | NA   | NA          | 10246509  | TCMID |
|    |     |           |                     | beta-sitosterol                                                                | NA    | NA   | NA          | 53399246  | TCMID |
|    |     |           |                     | campesterol                                                                    | NA    | NA   | NA          | 51051617  | TCMID |
|    |     |           |                     | campesterol ferulate                                                           | NA    | NA   | NA          | 15056832  | TCMID |
|    |     |           |                     | candicine                                                                      | 38.7  | 0.04 | 6656-13-9   | 23135     | TCMID |
|    |     |           |                     | candletoxin                                                                    | NA    | NA   | NA          | 442008    | TCMID |
|    |     |           |                     | columbamine                                                                    | 26.94 | 0.59 | 3621-36-1   | 72310     | TCMID |
|    |     |           |                     | delta1-dehydrotanshinone                                                       | 43.76 | 0.4  | 119963-50-7 | 128994    | TCMID |
|    |     |           |                     | delta7-dehydrosophoramine                                                      | NA    | NA   | NA          | 5316467   | TCMID |
|    |     |           |                     | gamma-sitosterol                                                               | NA    | NA   | NA          | 636741    | TCMID |
|    |     |           |                     | guanidine                                                                      | NA    | NA   | NA          | 451298    | TCMID |
|    |     |           |                     | herculin                                                                       | NA    | NA   | NA          | 5318023   | TCMID |
|    |     |           |                     | hericenone h                                                                   | NA    | NA   | NA          | 5318024   | TCMID |
|    |     |           |                     | jatrorrhizine                                                                  | NA    | NA   | NA          | 5459338   | TCMID |
|    |     |           |                     | javanicin                                                                      | 22.36 | 0.2  | 476-45-9    | 10149     | TCMID |
|    |     |           |                     | kihadanin b                                                                    | NA    | NA   | NA          | 156766    | TCMID |
|    |     |           |                     | magnoflorine                                                                   | NA    | NA   | NA          | 6451920   | TCMID |
|    |     |           |                     | magnograndiolide                                                               | 63.71 | 0.19 | 92618-98-9  | 5319198   | TCMID |
|    |     |           |                     | menisperine                                                                    | 26.17 | 0.59 | 17669-18-0  | 161487    | TCMID |
|    |     |           |                     | menisporphine                                                                  | NA    | NA   | NA          | 150032    | TCMID |
|    |     |           |                     | meruspermine                                                                   | NA    | NA   | NA          | 30358     | TCMID |
|    |     |           |                     | n-candicine                                                                    | NA    | NA   | NA          | 23135     | TCMID |
|    |     |           |                     | niloticin                                                                      | 41.41 | 0.82 | 115404-57-4 | 44559946  | TCMID |
|    |     |           |                     | norcariside                                                                    | NA    | NA   | NA          | 124899988 | TCMID |
|    |     |           |                     | obaculactone                                                                   | NA    | NA   | NA          | 179651    | TCMID |
|    |     |           |                     | obacunoic acid                                                                 | NA    | NA   | NA          | 54611038  | TCMID |
|    |     |           |                     | obacunoic acid                                                                 | NA    | NA   | NA          | 21140842  | TCMID |
|    |     |           |                     | obacunone                                                                      | NA    | NA   | NA          | 11331977  | TCMID |
|    |     |           |                     | obakulactone                                                                   | NA    | NA   | NA          | 179651    | TCMID |
|    |     |           |                     | obakunone                                                                      | NA    | NA   | NA          | NA        | TCMID |
|    |     |           |                     | obamegine                                                                      | NA    | NA   | NA          | 10257912  | TCMID |
|    |     |           |                     | palmatine                                                                      | NA    | NA   | NA          | 200119    | TCMID |
|    |     |           |                     | palmidin                                                                       | NA    | NA   | NA          | 5320384   | TCMID |
|    |     |           |                     | phellamurin                                                                    | NA    | NA   | NA          | 7163183   | TCMID |
|    |     |           |                     | phellatin                                                                      | NA    | NA   | NA          | 44258781  | TCMID |
|    |     |           |                     | phellavin                                                                      | NA    | NA   | NA          | 5320517   | TCMID |
|    |     |           |                     | phellendrine                                                                   | NA    | NA   | NA          | NA        | TCMID |
|    |     |           |                     | phellodendrine                                                                 | NA    | NA   | NA          | 9928008   | TCMID |
|    |     |           |                     | phellodendroside                                                               | NA    | NA   | NA          | 101316827 | TCMID |
|    |     |           |                     | phellopterin                                                                   | 40.19 | 0.28 | 2543-94-4   | 98608     | TCMID |
|    |     |           |                     | phelloside                                                                     | NA    | NA   | NA          | 102076744 | TCMID |
|    |     |           |                     | phenethylamine                                                                 | NA    | NA   | NA          | 6365704   | TCMID |
|    |     |           |                     | tetrahydroberberine                                                            | NA    | NA   | NA          | 443422    | TCMID |
|    |     |           |                     | tetrahydrojatrorrhizine                                                        | NA    | NA   | NA          | 185605    | TCMID |
|    |     |           |                     | tetrahydropalmitine                                                            | NA    | NA   | NA          | NA        | TCMID |
|    |     |           |                     | tetrapalmitine                                                                 | NA    | NA   | NA          | NA        | TCMID |
|    |     |           |                     | thalifendine                                                                   | NA    | NA   | NA          | 5321913   | TCMID |
|    |     |           |                     | thaloiphenine                                                                  | NA    | NA   | NA          | 24197663  | TCMID |
|    |     |           |                     | $\beta$ -sitosterol                                                            | 36.91 | 0.75 | 83-46-5     | 222284    | TCMID |
|    |     |           |                     | $\Delta$ 7-dehydrosophoramine                                                  | NA    | NA   | NA          | 5316467   | TCMID |
| 15 | 西红花 | Xihonghua | <i>Croci Stigma</i> | n-heptanal                                                                     | 79.74 | 0.59 | 85-86-9     | NA        | TCMSP |
|    |     |           |                     | crocetin                                                                       | 35.3  | 0.26 | 27876-94-4  | 5281232   | TCMSP |
|    |     |           |                     | isorhamnetin                                                                   | 49.6  | 0.31 | 480-19-3    | 5281654   | TCMSP |
|    |     |           |                     | kaempferol                                                                     | 41.88 | 0.24 | 520-18-3    | 5280863   | TCMSP |
|    |     |           |                     | quercetin                                                                      | 46.43 | 0.28 | 73123-10-1  | 5280343   | TCMSP |
|    |     |           |                     | nonacosane                                                                     | 8.12  | 0.39 | 630-03-5    | 12409     | CSDB  |
|    |     |           |                     | phytoene                                                                       | 39.56 | 0.5  | 540-04-5    | 5280784   | CSDB  |
|    |     |           |                     | kaempferol-3-O- $\beta$ -D-glucopyranosyl(1 $\rightarrow$ 2)- $\beta$ -D-6-ace | NA    | NA   | NA          | NA        | CSDB  |
|    |     |           |                     | kaempferol-3-O- $\beta$ -D-glucopyranosyl(1 $\rightarrow$ 2)- $\beta$ -D-gluc  | NA    | NA   | NA          | NA        | CSDB  |
|    |     |           |                     | astragal in                                                                    | NA    | NA   | 480-10-4    | 5282102   | CSDB  |
|    |     |           |                     | phytofluene                                                                    | NA    | NA   | 540-05-6    | 6436722   | CSDB  |
|    |     |           |                     | mutatoxanthin                                                                  | NA    | NA   | 31661-06-0  | 134737870 | CSDB  |
|    |     |           |                     | linoleic acid                                                                  | 41.9  | 0.14 | 60-33-3     | 5280450   | CSDB  |
|    |     |           |                     | oleonic acid                                                                   | 29.02 | 0.76 | 508-02-1    | 10494     | CSDB  |
|    |     |           |                     | stigmaterol                                                                    | 43.83 | 0.76 | 83-48-7     | 5280794   | CSDB  |
|    |     |           |                     | $\beta$ -carotene                                                              | 37.18 | 0.58 | 7235-40-7   | 5280489   | CSDB  |
|    |     |           |                     | kaempferol-3-glucoside                                                         | NA    | NA   | 480-10-4    | 5282102   | CSDB  |
|    |     |           |                     | campesterol                                                                    | 37.58 | 0.71 | 474-62-4    | 173183    | CSDB  |
|    |     |           |                     | palmitoleic acid                                                               | 35.78 | 0.1  | 373-49-9    | 445638    | CSDB  |
|    |     |           |                     | ursolic acid                                                                   | 16.77 | 0.75 | 77-52-1     | 64945     | CSDB  |
|    |     |           |                     | helichrysid                                                                    | NA    | NA   | 56343-26-1  | 5317991   | CSDB  |
|    |     |           |                     | picrocrocin                                                                    | 24.05 | 0.23 | NA          | 130796    | CSDB  |
|    |     |           |                     | crocin                                                                         | NA    | NA   | 103-90-2    | 1983      | CSDB  |
|    |     |           |                     | crocetin                                                                       | 35.3  | 0.26 | NA          | 5281232   | CSDB  |
|    |     |           |                     | safranal                                                                       | 39.56 | 0.04 | 116-26-7    | 61041     | CSDB  |
|    |     |           |                     | kaempferol-3- $\beta$ -D-glucopyranosyl(2 $\rightarrow$ 1)- $\beta$ -D-glucopy | NA    | NA   | NA          | NA        | CSDB  |
|    |     |           |                     | (1R,3S,5S)-5-trimethylcyclohex-3-enol-O- $\beta$ -D-glucopyra                  | NA    | NA   | NA          | NA        | TCMID |
|    |     |           |                     | (1R,5S,6R)-5-(hydroxymethyl)-4,4,6-trimethyl-7-ox                              | NA    | NA   | NA          | NA        | TCMID |
|    |     |           |                     | (2Z)-3-methylpent-2-enedioic acid-1-[1-(2,4,4-trimet                           | NA    | NA   | NA          | NA        | TCMID |
|    |     |           |                     | (3S),4-dihydroxybutyric acid                                                   | NA    | NA   | NA          | 10920498  | TCMID |
|    |     |           |                     | (4R)-4-(hydroxyl-methyl)-3,5,5-trimethylcyclohex-2-                            | NA    | NA   | NA          | NA        | TCMID |
|    |     |           |                     | (4R)-4-hydroxy dihydrofuran-2-one-O- $\beta$ -D-glucopyra                      | NA    | NA   | NA          | NA        | TCMID |
|    |     |           |                     | (4R)-4-hydroxy-2,6,6-trimethyl-1-cyclohexene-1-car                             | NA    | NA   | NA          | NA        | TCMID |
|    |     |           |                     | (4R)-4-hydroxy-2,6,6-trimethylcyclohex-1-enecarbal                             | NA    | NA   | NA          | NA        | TCMID |
|    |     |           |                     | (4R)-4-hydroxy-2,6,6-trimethylcyclohex-1-enecarbal                             | NA    | NA   | NA          | NA        | TCMID |
|    |     |           |                     | (4R)-4-hydroxy-2,6,6-trimethylcyclohex-1-enecarbox                             | NA    | NA   | NA          | NA        | TCMID |
|    |     |           |                     | (4S)-4-(hydroxyl-methyl)-3,5,5-trimethylcyclohex-2-                            | NA    | NA   | NA          | NA        | TCMID |
|    |     |           |                     | (4S)-4-(hydroxyl-methyl)-3,5,5-trimethylcyclohex-2-                            | NA    | NA   | NA          | NA        | TCMID |
|    |     |           |                     | (4S)-4-hydroxydihydrofuran-2-one-O- $\beta$ -D-glucopyran                      | NA    | NA   | NA          | NA        | TCMID |
|    |     |           |                     | (4S,R)-4-hydroxy-4-(3'-hydroxy-1'-butenyl)-3,5,5-                              | 37.72 | 0.07 | NA          | 13857510  | TCMID |
|    |     |           |                     | (5S)-5-hydroxy-7,7-dimethyl-4,5,6,7-tetrahydro-3H                              | NA    | NA   | NA          | NA        | TCMID |
|    |     |           |                     | 1-(9H- $\beta$ -carbolin-1-yl)-3,4,5-trihydroxypentan-1-one                    | NA    | NA   | NA          | NA        | TCMID |
|    |     |           |                     | 1-methyl-3-methoxy-6,8-dihydroxyanthraquinone-2-carb                           | NA    | NA   | NA          | NA        | TCMID |
|    |     |           |                     | 1-methyl-3-methoxy-8-hydroxyanthraquinone-2-carbo                              | NA    | NA   | NA          | NA        | TCMID |
|    |     |           |                     | 1-o-(4-hydroxybenzoyl)- $\beta$ -d-glucose                                     | NA    | NA   | NA          | 50906377  | TCMID |
|    |     |           |                     | 13-cis-crocetin di( $\beta$ -D-gentiobiosyl)ester                              | NA    | NA   | NA          | 44630212  | TCMID |
|    |     |           |                     | 13-cis-crocetin $\beta$ -D-gentiobiosyl- $\beta$ -D-glucosyl ester             | NA    | NA   | NA          | 22833598  | TCMID |
|    |     |           |                     | 2,3,4-trihydroxy-6-methoxy-acetophenone-3- $\beta$ -D-glu                      | NA    | NA   | NA          | NA        | TCMID |
|    |     |           |                     | 2,4,4-trimethyl-3-formyl-6-hydroxy-2,5-cyclohexadi                             | NA    | NA   | NA          | 15715950  | TCMID |
|    |     |           |                     | 2,4-dihydroxy-6-methoxy-acetophenone-2- $\beta$ -D-glucos                      | NA    | NA   | NA          | NA        | TCMID |
|    |     |           |                     | 2,6,6-trimethyl-4-hydroxy-1-cyclohexene-1-carbalde                             | NA    | NA   | NA          | 10929172  | TCMID |
|    |     |           |                     | 2-Citreosin                                                                    | NA    | NA   | NA          | 102431612 | TCMID |
|    |     |           |                     | 2-formyl-5-methoxyfuran                                                        | NA    | NA   | NA          | 6208      | TCMID |
|    |     |           |                     | 2-phenylethyl O- $\beta$ -D-glucopyranoside                                    | NA    | NA   | NA          | NA        | TCMID |
|    |     |           |                     | 3,5,5-trimethyl-1,4-cyclohexadion-2-ene                                        | NA    | NA   | NA          | NA        | TCMID |
|    |     |           |                     | 3,5,5-trimethyl-2-hydroxy-1,4-cyclohexadion-2-en                               | NA    | NA   | NA          | NA        | TCMID |
|    |     |           |                     | 3,5,5-trimethyl-4-hydroxy-1-cyclohexanon-2-ene                                 | NA    | NA   | NA          | NA        | TCMID |
|    |     |           |                     | 3,5,5-trimethyl-1,4-cyclohexadione                                             | NA    | NA   | NA          | 30181     | TCMID |
|    |     |           |                     | 3-Hydroxy-4-methoxybenzoic acid                                                | 39.42 | 0.04 | 645-08-9    | 12575     | TCMID |



|    |     |            |                            |                                                                  |       |      |             |           |       |
|----|-----|------------|----------------------------|------------------------------------------------------------------|-------|------|-------------|-----------|-------|
|    |     |            |                            | 3-hydroxy-β-ionone                                               | NA    | NA   | NA          | 10846059  | TCMID |
|    |     |            |                            | 4-hydroxybenzoic acid                                            | NA    | NA   | NA          | 135       | TCMID |
|    |     |            |                            | 4-hydroxymethyl-3, 5, 5-trimethylcyclohex-3-enol                 | NA    | NA   | NA          | NA        | TCMID |
|    |     |            |                            | 4-hydroxyphenethyl alcohol                                       | 33.81 | 0.02 | 501-94-0    | 10393     | TCMID |
|    |     |            |                            | 5-methyluracil                                                   | 74.2  | 0.02 | 65-71-4     | 1135      | TCMID |
|    |     |            |                            | 6-hydroxy-3-(hydroxymethyl)-2, 4, 4-trimethyl-2, 5-cyclohexenone | NA    | NA   | NA          | NA        | TCMID |
|    |     |            |                            | 6-oxohepta-2, 4-dienoic acid β-gentiobiosyl ester                | NA    | NA   | NA          | NA        | TCMID |
|    |     |            |                            | adenosine                                                        | NA    | NA   | NA          | 54732806  | TCMID |
|    |     |            |                            | alpha-crocin                                                     | 7.06  | 0.12 | 94238-00-3  | 5281233   | TCMID |
|    |     |            |                            | astragalol                                                       | NA    | NA   | NA          | 44258797  | TCMID |
|    |     |            |                            | azafrine 1                                                       | NA    | NA   | NA          | 101808618 | TCMID |
|    |     |            |                            | azafrine 2                                                       | NA    | NA   | NA          | 101808619 | TCMID |
|    |     |            |                            | benzoic acid                                                     | NA    | NA   | NA          | 11107141  | TCMID |
|    |     |            |                            | benzyl O-β-D-glucopyranoside                                     | NA    | NA   | NA          | NA        | TCMID |
|    |     |            |                            | crocetin                                                         | NA    | NA   | NA          | 25244519  | TCMID |
|    |     |            |                            | crocetin di(β-D-gentiobiosyl)ester                               | NA    | NA   | NA          | 5281233   | TCMID |
|    |     |            |                            | crocetin di(β-D-glucosyl)ester                                   | NA    | NA   | NA          | NA        | TCMID |
|    |     |            |                            | crocetin dimethylester                                           | NA    | NA   | NA          | NA        | TCMID |
|    |     |            |                            | crocetin mono(β-D-gentiobiosyl)ester                             | NA    | NA   | NA          | NA        | TCMID |
|    |     |            |                            | crocetin mono(β-D-glucosyl)ester                                 | NA    | NA   | NA          | 10368299  | TCMID |
|    |     |            |                            | crocetin monomethylester                                         | NA    | NA   | NA          | NA        | TCMID |
|    |     |            |                            | crocetin β-D-glucosylmethylester                                 | NA    | NA   | NA          | NA        | TCMID |
|    |     |            |                            | crocetin(β-gentiobiosyl)(β-neapolitanosyl)ester                  | NA    | NA   | NA          | 25246046  | TCMID |
|    |     |            |                            | crocetinβ-D-gentiobiosyl-β-D-glucosyl ester                      | NA    | NA   | NA          | NA        | TCMID |
|    |     |            |                            | crocin                                                           | NA    | NA   | NA          | 56841542  | TCMID |
|    |     |            |                            | crocusatin                                                       | NA    | NA   | NA          | 10419390  | TCMID |
|    |     |            |                            | crocusatin b                                                     | NA    | NA   | NA          | 9989926   | TCMID |
|    |     |            |                            | crocusatin c                                                     | NA    | NA   | NA          | 641786    | TCMID |
|    |     |            |                            | crocusatin d                                                     | NA    | NA   | NA          | 11063077  | TCMID |
|    |     |            |                            | crocusatin e                                                     | 46.39 | 0.03 | 471-01-2    | 10108     | TCMID |
|    |     |            |                            | crocusatin f                                                     | NA    | NA   | NA          | 11095589  | TCMID |
|    |     |            |                            | crocusatin g                                                     | NA    | NA   | NA          | 10921468  | TCMID |
|    |     |            |                            | crocusatin h                                                     | NA    | NA   | NA          | 637013    | TCMID |
|    |     |            |                            | crocusatin i                                                     | NA    | NA   | NA          | 641786    | TCMID |
|    |     |            |                            | crocusatin j                                                     | NA    | NA   | NA          | 11183031  | TCMID |
|    |     |            |                            | crocusatin k                                                     | NA    | NA   | NA          | 641786    | TCMID |
|    |     |            |                            | crocusatin l                                                     | NA    | NA   | NA          | 10419872  | TCMID |
|    |     |            |                            | croscatol A                                                      | NA    | NA   | NA          | 44259388  | TCMID |
|    |     |            |                            | croscatol B                                                      | NA    | NA   | NA          | NA        | TCMID |
|    |     |            |                            | dimethylcrocetin                                                 | NA    | NA   | NA          | 5316132   | TCMID |
|    |     |            |                            | emodin                                                           | NA    | NA   | NA          | 25201450  | TCMID |
|    |     |            |                            | gama-crocetin                                                    | NA    | NA   | NA          | NA        | TCMID |
|    |     |            |                            | harman                                                           | 33.1  | 0.1  | 486-84-0    | 5281404   | TCMID |
|    |     |            |                            | helichrysin                                                      | NA    | NA   | NA          | 44259193  | TCMID |
|    |     |            |                            | isochlorogenic acid                                              | 44.98 | 0.03 | 78-59-1     | 6544      | TCMID |
|    |     |            |                            | isoquercetin                                                     | NA    | NA   | NA          | 25203368  | TCMID |
|    |     |            |                            | isorhamnetin-3, 4'-diglucoside                                   | NA    | NA   | NA          | 44259359  | TCMID |
|    |     |            |                            | isorhamnetin-3-o-robinobioside                                   | NA    | NA   | NA          | 5491808   | TCMID |
|    |     |            |                            | isorhamnetin-3-β-D-glucoside                                     | NA    | NA   | NA          | 44429737  | TCMID |
|    |     |            |                            | kaempferol                                                       | NA    | NA   | NA          | 25202062  | TCMID |
|    |     |            |                            | kaempferol                                                       | NA    | NA   | NA          | 25202062  | TCMID |
|    |     |            |                            | kaempferol 3, 7-di-O-β-D-glucopyranoside                         | NA    | NA   | NA          | NA        | TCMID |
|    |     |            |                            | kaempferol 3-O-β-D-(2-O-β-D-6-acetylglucosyl)glucoside           | NA    | NA   | NA          | NA        | TCMID |
|    |     |            |                            | kaempferol 3-O-β-D-(2-O-β-D-acetylglucosyl)glucoside             | NA    | NA   | NA          | NA        | TCMID |
|    |     |            |                            | kaempferol 3-O-β-D-(2-O-β-D-glucosyl)glucoside                   | NA    | NA   | NA          | NA        | TCMID |
|    |     |            |                            | kaempferol 3-O-β-D-(2-O-β-D-glucosyl)glucoside-7-O               | NA    | NA   | NA          | NA        | TCMID |
|    |     |            |                            | kaempferol 3-O-β-D-(6-O-acetyl)glucopyranoside                   | NA    | NA   | NA          | NA        | TCMID |
|    |     |            |                            | kaempferol 3-O-β-D-(6-O-acetyl)glucopyranoside-7-O               | NA    | NA   | NA          | NA        | TCMID |
|    |     |            |                            | kaempferol 7-O-β-D-(2-O-β-D-glucosyl)glucoside                   | NA    | NA   | NA          | 6325460   | TCMID |
|    |     |            |                            | kaempferol 7-O-β-D-glucopyranoside                               | 3.33  | 0.76 | 60-33-3     | 10095180  | TCMID |
|    |     |            |                            | kaempferol 7-sophoroside                                         | NA    | NA   | NA          | 44258978  | TCMID |
|    |     |            |                            | methylparaben                                                    | 5.94  | 0.03 | 99-76-3     | 7456      | TCMID |
|    |     |            |                            | methylvanillate                                                  | NA    | NA   | NA          | 19844     | TCMID |
|    |     |            |                            | nicotinamide                                                     | NA    | NA   | NA          | 3013212   | TCMID |
|    |     |            |                            | nonacosane                                                       | 8.12  | 0.39 | 630-03-5    | 12409     | TCMID |
|    |     |            |                            | p-coumaric acid                                                  | NA    | NA   | NA          | 54708745  | TCMID |
|    |     |            |                            | phytoene                                                         | NA    | NA   | NA          | 9963391   | TCMID |
|    |     |            |                            | phytofluene                                                      | NA    | NA   | NA          | 16061225  | TCMID |
|    |     |            |                            | picrocrocin                                                      | NA    | NA   | NA          | 22833654  | TCMID |
|    |     |            |                            | protocatechuic acid                                              | NA    | NA   | NA          | 54675866  | TCMID |
|    |     |            |                            | protocatechuic acid methyl ester                                 | 38.19 | 0.04 | 2150-43-8   | 287064    | TCMID |
|    |     |            |                            | protocrocin                                                      | NA    | NA   | NA          | 24883912  | TCMID |
|    |     |            |                            | pyridin-3-yl-methanol                                            | NA    | NA   | NA          | 7510      | TCMID |
|    |     |            |                            | safranal                                                         | 39.56 | 0.04 | 116-26-7    | 61041     | TCMID |
|    |     |            |                            | safranal                                                         | 39.56 | 0.04 | 116-26-8    | 61041     | TCMID |
|    |     |            |                            | sativol                                                          | NA    | NA   | NA          | 3084009   | TCMID |
|    |     |            |                            | sodium(2S)-(O-hydroxyphenyl)lactate                              | NA    | NA   | NA          | NA        | TCMID |
|    |     |            |                            | sophoraflavonolone                                               | NA    | NA   | NA          | 10371538  | TCMID |
|    |     |            |                            | tetrahydrocyclopentadiene                                        | NA    | NA   | NA          | 16061313  | TCMID |
|    |     |            |                            | tribulusterine                                                   | NA    | NA   | NA          | 4867627   | TCMID |
|    |     |            |                            | uracil                                                           | NA    | NA   | NA          | 49769955  | TCMID |
|    |     |            |                            | vanillic acid                                                    | NA    | NA   | NA          | 54675858  | TCMID |
|    |     |            |                            | zeaxanthin                                                       | NA    | NA   | NA          | 29921731  | TCMID |
|    |     |            |                            | β-carotene                                                       | 37.18 | 0.58 | 7235-40-7   | 5280489   | TCMID |
| 16 | 九里香 | Jiulixiang | Murrayae Folium Et Cacumen | octacosanol                                                      | 10.7  | 0.41 | 557-61-9    | 68406     | CSDB  |
|    |     |            |                            | 5, 7-dimethoxy-8-(3'-methyl-2'-oxobutyl)-coumarin                | NA    | NA   | NA          | NA        | CSDB  |
|    |     |            |                            | 3-(1,1-dimethylallyl)-xanthone                                   | NA    | NA   | NA          | NA        | CSDB  |
|    |     |            |                            | 3-(1,1-dimethylallyl)-xanthyletin                                | NA    | NA   | 50488-96-5  | 14133592  | CSDB  |
|    |     |            |                            | eugenol                                                          | 56.24 | 0.04 | 97-53-0     | 3314      | CSDB  |
|    |     |            |                            | β-caryophyllene                                                  | 29.7  | 0.09 | 87-44-5     | 5281515   | CSDB  |
|    |     |            |                            | caryophyllene                                                    | NA    | NA   | NA          | NA        | CSDB  |
|    |     |            |                            | heptamethoxyflavone                                              | NA    | NA   | 87402-97-9  | NA        | CSDB  |
|    |     |            |                            | 3,5,6,7,8,3',4',5'-octamethoxyflavone                            | NA    | NA   | NA          | NA        | CSDB  |
|    |     |            |                            | exoticin                                                         | NA    | NA   | 13364-94-8  | 389000    | CSDB  |
|    |     |            |                            | murpanidin                                                       | NA    | NA   | 88546-96-7  | 389002    | CSDB  |
|    |     |            |                            | panial                                                           | NA    | NA   | 112606-74-3 | NA        | CSDB  |
|    |     |            |                            | murpaniculol                                                     | NA    | NA   | 112458-25-0 | 5319956   | CSDB  |
|    |     |            |                            | paniculal                                                        | 21.49 | 0.09 | 6724-42-1   | 11275724  | CSDB  |
|    |     |            |                            | paniculal                                                        | 21.49 | 0.09 | 6724-42-1   | 11275724  | CSDB  |
|    |     |            |                            | murpanicin                                                       | NA    | NA   | 113349-35-2 | 188750    | CSDB  |
|    |     |            |                            | isomexoticin                                                     | NA    | NA   | 88585-86-8  | 821399    | CSDB  |
|    |     |            |                            | murrayazoline                                                    | NA    | NA   | NA          | 375143    | CSDB  |
|    |     |            |                            | paniculatin                                                      | NA    | NA   | 32361-88-9  | 169419    | CSDB  |
|    |     |            |                            | murrayone                                                        | NA    | NA   | 19668-69-0  | 5319964   | CSDB  |
|    |     |            |                            | paniculin                                                        | NA    | NA   | 112397-12-3 | NA        | CSDB  |
|    |     |            |                            | murrayanine                                                      | NA    | NA   | 723-97-7    | 96942     | CSDB  |
|    |     |            |                            | murraol                                                          | NA    | NA   | 109741-38-0 | 15593213  | CSDB  |
|    |     |            |                            | hentriacontane                                                   | 8.07  | 0.51 | 630-04-6    | 12410     | CSDB  |
|    |     |            |                            | murraxocin                                                       | NA    | NA   | 113349-35-2 | 188750    | CSDB  |
|    |     |            |                            | mexolide                                                         | NA    | NA   | 75775-35-8  | 101999460 | CSDB  |
|    |     |            |                            | exozoline                                                        | NA    | NA   | 70561-79-4  | 101324894 | CSDB  |
|    |     |            |                            | murraxonin                                                       | NA    | NA   | 113270-89-6 | 5319960   | CSDB  |
|    |     |            |                            | microminutin                                                     | NA    | NA   | 84041-46-3  | 5319827   | CSDB  |
|    |     |            |                            | minumicrolin                                                     | NA    | NA   | 88546-96-7  | 389002    | CSDB  |
|    |     |            |                            | mahanimbicine                                                    | NA    | NA   | 30048-24-9  | 131750980 | CSDB  |
|    |     |            |                            | mahanimbicine                                                    | NA    | NA   | NA          | 4072580   | CSDB  |
|    |     |            |                            | mahanimbine                                                      | NA    | NA   | 21104-28-9  | 167963    | CSDB  |

|  |  |  |                                                                             |       |      |             |           |       |
|--|--|--|-----------------------------------------------------------------------------|-------|------|-------------|-----------|-------|
|  |  |  | 5,6,7,3',4'-pentamethoxyflavone                                             | 50.56 | 0.45 | 2306-27-6   | 145659    | CSDB  |
|  |  |  | 5,7,3',4',5'-pentamethoxyflavone                                            | NA    | NA   | NA          | 493376    | CSDB  |
|  |  |  | meranzin hydrate                                                            | NA    | NA   | 5875-49-0   | 5070783   | CSDB  |
|  |  |  | coumurrin                                                                   | NA    | NA   | 112457-36-0 | NA        | CSDB  |
|  |  |  | murrayatin                                                                  | NA    | NA   | 88640-83-9  | 13917412  | CSDB  |
|  |  |  | methyl salicylate                                                           | 42.55 | 0.03 | 119-36-8    | 4133      | CSDB  |
|  |  |  | murrangatin                                                                 | NA    | NA   | 37126-91-3  | 181514    | CSDB  |
|  |  |  | murrangatin acetate                                                         | NA    | NA   | 112667-49-9 | NA        | CSDB  |
|  |  |  | murranganon                                                                 | NA    | NA   | 112789-91-0 | 5319956   | CSDB  |
|  |  |  | murralongin                                                                 | NA    | NA   | 53011-72-6  | 179620    | CSDB  |
|  |  |  | coumurrayin                                                                 | 31.56 | 0.17 | 17245-25-9  | 176911    | CSDB  |
|  |  |  | 5,7,8,3',4',5'-hexamethoxyflavone                                           | NA    | NA   | NA          | 633619    | CSDB  |
|  |  |  | 5,6,7,3',4',5'-hexamethoxyflavone                                           | NA    | NA   | NA          | 185670    | CSDB  |
|  |  |  | bis-7-methoxygirinimbine A                                                  | NA    | NA   | 133632-47-0 | NA        | CSDB  |
|  |  |  | bicyclomahanimbicine                                                        | NA    | NA   | 28613-80-1  | 77994099  | CSDB  |
|  |  |  | bicyclomahanimbine                                                          | NA    | NA   | 31077-94-8  | 5315364   | CSDB  |
|  |  |  | bis-7-hydroxy-girinimbine A                                                 | NA    | NA   | 133655-90-0 | NA        | CSDB  |
|  |  |  | dehydroosthol                                                               | NA    | NA   | NA          | NA        | CSDB  |
|  |  |  | alanine                                                                     | NA    | NA   | 56-41-7     | 5950      | CSDB  |
|  |  |  | aurantiamide acetate                                                        | NA    | NA   | 56121-42-7  | 9832120   | CSDB  |
|  |  |  | scopoletin                                                                  | 27.77 | 0.08 | 92-61-5     | 5280460   | CSDB  |
|  |  |  | 7-methoxy-8-(2'-ethoxy-3'-hydroxy-3'-methylbutyl)coumarin                   | NA    | NA   | NA          | NA        | CSDB  |
|  |  |  | hainanmurpanin                                                              | NA    | NA   | 95360-22-8  | 5317952   | CSDB  |
|  |  |  | 7-methoxy-8-(2',3'-dihydroxy-3'-methylbutyl)coumarin                        | NA    | NA   | NA          | 5070783   | CSDB  |
|  |  |  | 7-methoxy-8-(2'-methoxy-3'-hydroxy-3'-methylbutyl)coumarin                  | NA    | NA   | NA          | 5319466   | CSDB  |
|  |  |  | 7-methoxy-8-(1'-methoxy-2'-hydroxy-3'-methyl-Δ <sup>3</sup> -butyl)coumarin | NA    | NA   | NA          | 5319464   | CSDB  |
|  |  |  | 7-methoxy-8-(2'-methyl-2'-formylpropyl)coumarin                             | NA    | NA   | NA          | 5319433   | CSDB  |
|  |  |  | 7-methoxy-8-(2'-hydroxy-3'-ethoxy-3'-methylbutyl)coumarin                   | NA    | NA   | NA          | 5319451   | CSDB  |
|  |  |  | koenimbin                                                                   | NA    | NA   | 21087-98-9  | 97487     | CSDB  |
|  |  |  | koenigicine                                                                 | NA    | NA   | 24123-92-0  | 278055    | CSDB  |
|  |  |  | cysteine                                                                    | NA    | NA   | 52-90-4     | 5862      | CSDB  |
|  |  |  | girimbine                                                                   | NA    | NA   | NA          | NA        | CSDB  |
|  |  |  | peroxymurraol                                                               | NA    | NA   | 121994-13-6 | NA        | CSDB  |
|  |  |  | peroxyauraptenol                                                            | NA    | NA   | 109741-39-1 | NA        | CSDB  |
|  |  |  | sibiricol                                                                   | NA    | NA   | 26481-12-9  | 13917413  | CSDB  |
|  |  |  | umbelliferone                                                               | 27.37 | 0.05 | 93-35-6     | 5281426   | CSDB  |
|  |  |  | umbelliferone                                                               | 27.37 | 0.05 | 93-35-6     | 5281426   | CSDB  |
|  |  |  | paniculonol isovalerate                                                     | NA    | NA   | NA          | NA        | CSDB  |
|  |  |  | isomahanimbine                                                              | NA    | NA   | NA          | 4072580   | CSDB  |
|  |  |  | isomurranganon senecioate                                                   | NA    | NA   | 112667-53-5 | NA        | CSDB  |
|  |  |  | isomurralonginol acetate                                                    | NA    | NA   | 112667-51-3 | 13917402  | CSDB  |
|  |  |  | isomurralonginol nicotinate                                                 | NA    | NA   | 112606-77-6 | NA        | CSDB  |
|  |  |  | 8-isopentenylmettin                                                         | NA    | NA   | NA          | 5318625   | CSDB  |
|  |  |  | casegravol                                                                  | NA    | NA   | 74474-76-3  | 6440521   | CSDB  |
|  |  |  | isomeranzin                                                                 | 42.78 | 0.15 | 1088-17-1   | 473252    | CSDB  |
|  |  |  | lupeol                                                                      | 12.12 | 0.78 | 545-47-1    | 259846    | CSDB  |
|  |  |  | sitosterol-β-d-galactoside                                                  | NA    | NA   | 55057-29-9  | NA        | CSDB  |
|  |  |  | methyl o-aminobenzoate                                                      | 86.52 | 0.03 | 134-20-3    | 8635      | CSDB  |
|  |  |  | cyclomahanimbine                                                            | NA    | NA   | 25488-33-9  | 375144    | CSDB  |
|  |  |  | 3-epi-cyclolaudenol                                                         | NA    | NA   | 90686-45-6  | 118987271 | CSDB  |
|  |  |  | osthol <br> osthole                                                         | 38.75 | 0.13 | 484-12-8    | 10228     | CSDB  |
|  |  |  | osthenon                                                                    | NA    | NA   | 112789-90-9 | 13917410  | CSDB  |
|  |  |  | imperatorin                                                                 | 34.55 | 0.22 | 482-44-0    | 10212     | CSDB  |
|  |  |  | nerolidol                                                                   | NA    | NA   | 7212-44-4   | 5284507   | CSDB  |
|  |  |  | cadinene                                                                    | 14.76 | 0.08 | 24406-05-1  | 12306048  | CSDB  |
|  |  |  | murrayacarine                                                               | NA    | NA   | 125288-14-4 | 11977126  | CSDB  |
|  |  |  | koenine                                                                     | NA    | NA   | 28200-63-7  | 5318827   | CSDB  |
|  |  |  | koenigine                                                                   | NA    | NA   | 28513-33-9  | 5318825   | CSDB  |
|  |  |  | colensenone                                                                 | NA    | NA   | 1757-94-4   | 101603220 | CSDB  |
|  |  |  | colensanone                                                                 | NA    | NA   | 1227-94-7   | NA        | CSDB  |
|  |  |  | citronellol                                                                 | NA    | NA   | 106-22-9    | 8842      | CSDB  |
|  |  |  | leucine                                                                     | NA    | NA   | 61-90-5     | 6106      | CSDB  |
|  |  |  | 7-methoxy-8-(1'-acetoxo-2'-oxo-3'-methylbutyl)coumarin                      | NA    | NA   | 95360-22-8  | 5317952   | CSDB  |
|  |  |  | geraniol                                                                    | 23.93 | 0.06 | 106-24-1    | 637566    | CSDB  |
|  |  |  | proline                                                                     | NA    | NA   | 147-85-3    | 145742    | CSDB  |
|  |  |  | phebalosin                                                                  | NA    | NA   | 6545-99-9   | 188300    | CSDB  |
|  |  |  | 4'-hydroxy-3,3',5,5',6,7-hexamethoxyflavone                                 | NA    | NA   | 77390-47-7  | NA        | CSDB  |
|  |  |  | 3-carene                                                                    | NA    | NA   | 13466-78-9  | 26049     | CSDB  |
|  |  |  | D-glucose                                                                   | NA    | NA   | NA          | 5793      | CSDB  |
|  |  |  | S-guaiazulene                                                               | 15.15 | 0.07 | 489-84-9    | 3515      | CSDB  |
|  |  |  | chloticol                                                                   | NA    | NA   | 112667-52-4 | NA        | CSDB  |
|  |  |  | tyrosine                                                                    | NA    | NA   | 60-18-4     | 6057      | CSDB  |
|  |  |  | vomifoliol                                                                  | 29.01 | 0.08 | 23526-45-6  | 5280462   | CSDB  |
|  |  |  | meranzin                                                                    | NA    | NA   | 489-53-2    | 3819217   | CSDB  |
|  |  |  | Se-guaiazulene                                                              | NA    | NA   | 492-45-5    | 10976461  | CSDB  |
|  |  |  | erythro-murrangatin                                                         | NA    | NA   | NA          | NA        | CSDB  |
|  |  |  | koenoline                                                                   | NA    | NA   | NA          | NA        | CSDB  |
|  |  |  | bisabolene                                                                  | 15.59 | 0.06 | 495-62-5    | 3033866   | CSDB  |
|  |  |  | (+)-mahanimbine                                                             | NA    | NA   | NA          | 167963    | TCMID |
|  |  |  | (+)-car-3-ene-2,5-dione                                                     | 64.23 | 0.06 | 6617-34-1   | 10057860  | TCMID |
|  |  |  | (s)-murpanidin                                                              | NA    | NA   | NA          | 13917407  | TCMID |
|  |  |  | (z)-(1s,5r)-beta-pinen-10-yl-beta-vicianoside                               | NA    | NA   | NA          | 3036428   | TCMID |
|  |  |  | (±)-murpaniculol                                                            | NA    | NA   | NA          | 76764423  | TCMID |
|  |  |  | 1-octacosanol                                                               | 10.7  | 0.41 | 557-61-9    | 68406     | TCMID |
|  |  |  | 3,5,6,7,3&#39;,4&#39;,5&#39;-heptamethoxyflavone                            | 31.97 | 0.59 | 17245-30-6  | 389001    | TCMID |
|  |  |  | 3,5,6,8,3&#39;,4&#39;,5&#39;-heptamethoxy flavon                            | NA    | NA   | NA          | NA        | TCMID |
|  |  |  | 3,5,7,8,3&#39;,4&#39;,5&#39;-heptamethoxyflavon                             | NA    | NA   | NA          | 5318050   | TCMID |
|  |  |  | 4&#39;-demethylpodophyllotoxin                                              | NA    | NA   | NA          | 500181    | TCMID |
|  |  |  | 5,6,7,3&#39;,4&#39;,5&#39;-hexamethoxyflavone                               | NA    | NA   | NA          | 185670    | TCMID |
|  |  |  | 5,6,7,8,3&#39;,4&#39;,5&#39;-heptamethoxy flavon                            | NA    | NA   | NA          | 72815     | TCMID |
|  |  |  | 5,6,8,3&#39;,4&#39;,5&#39;-hexamethoxyflavone                               | NA    | NA   | NA          | 44257604  | TCMID |
|  |  |  | 5,6-dimethoxy-8-(3&#39;-methyl-2&#39;-oxobutyl)coumarin                     | 31.93 | 0.3  | NA          | 5316869   | TCMID |
|  |  |  | 5,7-dimethoxy-8-(2&#39;-oxo-3&#39;-methylbutyl)coumarin                     | NA    | NA   | NA          | 5316871   | TCMID |
|  |  |  | 5,7-dimethoxy-8-(3&#39;-methyl-2&#39;-oxobutyl)coumarin                     | NA    | NA   | NA          | 5316871   | TCMID |
|  |  |  | 5-methoxyfuraldehyde                                                        | NA    | NA   | NA          | 6208      | TCMID |
|  |  |  | 5-methoxymethyl furfural                                                    | 28.23 | 0.02 | 1917-64-2   | 74711     | TCMID |
|  |  |  | 6,7-dimethoxy-2-(2-phenylethyl)chromone                                     | NA    | NA   | NA          | 5316872   | TCMID |
|  |  |  | 6-isopentenylloxysobergaptin                                                | NA    | NA   | NA          | 3084412   | TCMID |
|  |  |  | 7-methoxy-8-(2&#39;-formyl-2&#39;-methylpropyl)coumarin                     | NA    | NA   | NA          | 5319433   | TCMID |
|  |  |  | 7-methoxy-8-(2&#39;-methoxy-3&#39;-hydroxy-3&#39;-methylbutyl)coumarin      | NA    | NA   | NA          | NA        | TCMID |
|  |  |  | acronycine                                                                  | NA    | NA   | NA          | 345512    | TCMID |
|  |  |  | albiflorin-2                                                                | NA    | NA   | NA          | 26183437  | TCMID |
|  |  |  | alpha-cadinene                                                              | 14.76 | 0.08 | 24406-05-1  | 12306048  | TCMID |
|  |  |  | alpha-limonene                                                              | NA    | NA   | NA          | 22311     | TCMID |
|  |  |  | aromadendrene                                                               | 55.74 | 0.1  | 25246-27-9  | 11095734  | TCMID |
|  |  |  | bannamurpanisin                                                             | NA    | NA   | NA          | 633619    | TCMID |
|  |  |  | beta-pinene                                                                 | NA    | NA   | NA          | 14896     | TCMID |
|  |  |  | bicyclomahanimbicine                                                        | NA    | NA   | NA          | 5315354   | TCMID |
|  |  |  | bicyclomahanimbine                                                          | NA    | NA   | NA          | 5315364   | TCMID |
|  |  |  | carene-3                                                                    | NA    | NA   | NA          | 26049     | TCMID |
|  |  |  | caryophyllene epoxid                                                        | NA    | NA   | NA          | 14350     | TCMID |
|  |  |  | cis-osthenone                                                               | NA    | NA   | NA          | NA        | TCMID |
|  |  |  | citronellol                                                                 | 38.89 | 0.02 | 106-22-9    | 101977    | TCMID |
|  |  |  | citronellyl acetate                                                         | 22.68 | 0.04 | 150-84-5    | 6999975   | TCMID |
|  |  |  | coumurrayin                                                                 | 31.56 | 0.17 | 17245-25-9  | 176911    | TCMID |
|  |  |  | crassicauline                                                               | NA    | NA   | NA          | 6918110   | TCMID |

|    |     |          |                          |                                                       |       |      |             |          |       |
|----|-----|----------|--------------------------|-------------------------------------------------------|-------|------|-------------|----------|-------|
|    |     |          |                          | cyclomahanimbine                                      | NA    | NA   | NA          | 375144   | TCMID |
|    |     |          |                          | cyclomulberrin                                        | NA    | NA   | NA          | 11742872 | TCMID |
|    |     |          |                          | d-limonene                                            | 39.84 | 0.02 | 5989-27-5   | 440917   | TCMID |
|    |     |          |                          | demethylcephalotaxinone                               | NA    | NA   | NA          | 5316516  | TCMID |
|    |     |          |                          | dihydrocarveol acetate                                | NA    | NA   | NA          | 5316696  | TCMID |
|    |     |          |                          | dihydrocatalpol                                       | NA    | NA   | NA          | 11968426 | TCMID |
|    |     |          |                          | erythro-murrangatin                                   | NA    | NA   | NA          | 181514   | TCMID |
|    |     |          |                          | eugenol                                               | 56.24 | 0.04 | 97-53-0     | 3314     | TCMID |
|    |     |          |                          | eugenol methyl ether                                  | NA    | NA   | NA          | 21972505 | TCMID |
|    |     |          |                          | exoticin                                              | NA    | NA   | NA          | 389000   | TCMID |
|    |     |          |                          | exozoline                                             | NA    | NA   | NA          | 5317308  | TCMID |
|    |     |          |                          | gamma-fagarine                                        | 72.23 | 0.15 | 524-15-2    | 107936   | TCMID |
|    |     |          |                          | geraniol                                              | 35.66 | 0.02 | 106-25-2    | 643820   | TCMID |
|    |     |          |                          | geranyl acetate                                       | NA    | NA   | NA          | 24832062 | TCMID |
|    |     |          |                          | hainanmurpanin                                        | NA    | NA   | NA          | 5317952  | TCMID |
|    |     |          |                          | hainanolide                                           | NA    | NA   | NA          | 56841078 | TCMID |
|    |     |          |                          | heptanal                                              | NA    | NA   | NA          | 53630757 | TCMID |
|    |     |          |                          | higenamine                                            | 82.54 | 0.21 | 106032-53-5 | 440988   | TCMID |
|    |     |          |                          | i-23                                                  | NA    | NA   | NA          | 5318396  | TCMID |
|    |     |          |                          | ilaxiflorin d                                         | NA    | NA   | NA          | NA       | TCMID |
|    |     |          |                          | imperatorin                                           | 34.55 | 0.22 | 482-44-0    | 10212    | TCMID |
|    |     |          |                          | imperialine                                           | NA    | NA   | NA          | 442977   | TCMID |
|    |     |          |                          | isocembrol                                            | NA    | NA   | NA          | 12444349 | TCMID |
|    |     |          |                          | isomeramazin                                          | 42.78 | 0.15 | 1088-17-1   | 473252   | TCMID |
|    |     |          |                          | isomesityl oxide                                      | NA    | NA   | NA          | 19543    | TCMID |
|    |     |          |                          | isomexoticin                                          | NA    | NA   | NA          | 4465807  | TCMID |
|    |     |          |                          | mahanimbidine                                         | NA    | NA   | NA          | 5319214  | TCMID |
|    |     |          |                          | meranzinhydrate                                       | NA    | NA   | NA          | 821433   | TCMID |
|    |     |          |                          | meratin                                               | NA    | NA   | NA          | 10282712 | TCMID |
|    |     |          |                          | methyl salicylate                                     | NA    | NA   | NA          | 11378589 | TCMID |
|    |     |          |                          | methylanthranilate                                    | NA    | NA   | NA          | 49791725 | TCMID |
|    |     |          |                          | mexoticin                                             | NA    | NA   | NA          | 4465807  | TCMID |
|    |     |          |                          | mezerein                                              | NA    | NA   | NA          | 24832075 | TCMID |
|    |     |          |                          | microminutin                                          | NA    | NA   | NA          | 331548   | TCMID |
|    |     |          |                          | mikanolide                                            | NA    | NA   | NA          | 5140086  | TCMID |
|    |     |          |                          | murpanicin                                            | NA    | NA   | NA          | 92154813 | TCMID |
|    |     |          |                          | murpaniculol                                          | NA    | NA   | NA          | 76764423 | TCMID |
|    |     |          |                          | murpanidin(s)                                         | NA    | NA   | NA          | 13917407 | TCMID |
|    |     |          |                          | murralogin                                            | NA    | NA   | NA          | 5319957  | TCMID |
|    |     |          |                          | murralongin                                           | NA    | NA   | NA          | 179620   | TCMID |
|    |     |          |                          | murranganon                                           | NA    | NA   | NA          | 5319956  | TCMID |
|    |     |          |                          | murrangatin acetate                                   | NA    | NA   | NA          | 5319958  | TCMID |
|    |     |          |                          | murraonl                                              | NA    | NA   | NA          | 78385338 | TCMID |
|    |     |          |                          | murrayanine                                           | NA    | NA   | NA          | 638195   | TCMID |
|    |     |          |                          | murrayatin                                            | NA    | NA   | NA          | 621354   | TCMID |
|    |     |          |                          | murrayazoline                                         | NA    | NA   | NA          | 21770913 | TCMID |
|    |     |          |                          | murrayone                                             | NA    | NA   | NA          | 5319964  | TCMID |
|    |     |          |                          | musaroside                                            | NA    | NA   | NA          | 56840967 | TCMID |
|    |     |          |                          | n-demethyl-acronycine                                 | NA    | NA   | NA          | 6325047  | TCMID |
|    |     |          |                          | n-demethylnoracronycine                               | NA    | NA   | NA          | 5479541  | TCMID |
|    |     |          |                          | n-methylanthranilamide                                | NA    | NA   | NA          | 101222   | TCMID |
|    |     |          |                          | noracronycine                                         | NA    | NA   | NA          | 5320199  | TCMID |
|    |     |          |                          | noradrenaline                                         | NA    | NA   | NA          | 25127519 | TCMID |
|    |     |          |                          | osthol                                                | 38.75 | 0.13 | 484-12-8    | 10228    | TCMID |
|    |     |          |                          | ostruthin                                             | NA    | NA   | NA          | 5357655  | TCMID |
|    |     |          |                          | panial                                                | NA    | NA   | NA          | NA       | TCMID |
|    |     |          |                          | paniculatin                                           | NA    | NA   | NA          | 44257269 | TCMID |
|    |     |          |                          | paniculatonoid                                        | NA    | NA   | NA          | 11968822 | TCMID |
|    |     |          |                          | paniculin                                             | NA    | NA   | NA          | 14285091 | TCMID |
|    |     |          |                          | paniculonol isovalerate                               | NA    | NA   | NA          | NA       | TCMID |
|    |     |          |                          | perillaldehyde                                        | NA    | NA   | NA          | 16441    | TCMID |
|    |     |          |                          | perillyl alcohol                                      | 46.24 | 0.03 | 18457-55-1  | 369312   | TCMID |
|    |     |          |                          | perillylaldehyde                                      | NA    | NA   | NA          | 16441    | TCMID |
|    |     |          |                          | periplocin                                            | NA    | NA   | NA          | 9874859  | TCMID |
|    |     |          |                          | phebalosin                                            | NA    | NA   | NA          | 5320515  | TCMID |
|    |     |          |                          | phellamurin                                           | NA    | NA   | NA          | 7163183  | TCMID |
|    |     |          |                          | pulegone                                              | NA    | NA   | NA          | 11665448 | TCMID |
|    |     |          |                          | pulsatillidic acid                                    | NA    | NA   | NA          | 11155643 | TCMID |
|    |     |          |                          | scopoletin                                            | 27.77 | 0.08 | 92-61-5     | 5280460  | TCMID |
|    |     |          |                          | scopolin                                              | NA    | NA   | NA          | 11953803 | TCMID |
|    |     |          |                          | scoulerine                                            | NA    | NA   | NA          | 1152279  | TCMID |
|    |     |          |                          | semi- $\alpha$ -carotene                              | NA    | NA   | NA          | NA       | TCMID |
|    |     |          |                          | sempervirine(i)                                       | NA    | NA   | NA          | NA       | TCMID |
|    |     |          |                          | sinensetin                                            | 50.56 | 0.45 | 2306-27-6   | 145659   | TCMID |
|    |     |          |                          | skimmin                                               | 40.14 | 0.2  | 5255-76-5   | 6760     | TCMID |
|    |     |          |                          | skimmin                                               | NA    | NA   | NA          | 320361   | TCMID |
|    |     |          |                          | threo-murrangatin                                     | NA    | NA   | NA          | 180297   | TCMID |
|    |     |          |                          | vomifoliol                                            | 30.24 | 0.08 | 81425-28-7  | 11816951 | TCMID |
|    |     |          |                          | yuehchukene                                           | NA    | NA   | NA          | 126009   | TCMID |
|    |     |          |                          | yunaconitine                                          | NA    | NA   | NA          | 11422434 | TCMID |
|    |     |          |                          | $\alpha$ -pinene                                      | 44.84 | 0.05 | 18172-67-3  | 440967   | TCMID |
|    |     |          |                          | $\beta$ -caryophyllene                                | NA    | NA   | NA          | 18502770 | TCMID |
|    |     |          |                          | $\beta$ -pinene                                       | 44.84 | 0.05 | 18172-67-3  | 440967   | TCMID |
|    |     |          |                          | $\gamma$ -caryophyllene                               | 27.36 | 0.09 | 10579-93-8  | 5452236  | TCMID |
| 17 | 延胡索 | Yanhusuo | <i>Corydalis Rhizoma</i> | berberine                                             | 36.86 | 0.78 | 633-66-9    | NA       | TCMSP |
|    |     |          |                          | coptisine                                             | 30.67 | 0.86 | 3486-66-6   | NA       | TCMSP |
|    |     |          |                          | Cryptopin                                             | 78.74 | 0.72 | 482-74-6    | NA       | TCMSP |
|    |     |          |                          | Dihydrochelerythrine                                  | 32.73 | 0.81 | 6880-91-7   | 485077   | TCMSP |
|    |     |          |                          | Dihydrosanguinarine                                   | 59.31 | 0.86 | 3606-45-9   | NA       | TCMSP |
|    |     |          |                          | sanguinarine                                          | 37.81 | 0.86 | 2447-54-3   | NA       | TCMSP |
|    |     |          |                          | (S)-Scoulerine                                        | 32.28 | 0.54 | 6451-72-5   | 439654   | TCMSP |
|    |     |          |                          | Cavidine                                              | 35.64 | 0.81 | 32728-75-9  | NA       | TCMSP |
|    |     |          |                          | (R)-Canadine                                          | 55.37 | 0.77 | 522-97-4    | NA       | TCMSP |
|    |     |          |                          | sitosterol                                            | 36.91 | 0.75 | 83-46-5     | 12303645 | TCMSP |
|    |     |          |                          | Hyndarin                                              | 73.94 | 0.64 | 84-38-8     | 72301    | TCMSP |
|    |     |          |                          | (-)- $\alpha$ -N-methylcanadine                       | 45.06 | 0.8  | 47474-49-7  | NA       | TCMSP |
|    |     |          |                          | Capaurine                                             | 62.91 | 0.69 | 478-14-8    | 94149    | TCMSP |
|    |     |          |                          | Clarkeandine                                          | 86.65 | 0.54 | 99615-99-3  | 127376   | TCMSP |
|    |     |          |                          | CORYDALINE                                            | 65.84 | 0.68 | 518-69-4    | 101301   | TCMSP |
|    |     |          |                          | Corydalmine                                           | 52.5  | 0.59 | 30413-84-4  | NA       | TCMSP |
|    |     |          |                          | Corydine                                              | 37.16 | 0.55 | 476-69-7    | 10153    | TCMSP |
|    |     |          |                          | 18797-79-0                                            | 46.06 | 0.85 | 18797-79-0  | NA       | TCMSP |
|    |     |          |                          | Corynoloxine                                          | 38.12 | 0.6  | 31470-65-2  | NA       | TCMSP |
|    |     |          |                          | methyl-[2-(3,4,6,7-tetramethoxy-1-phenanthryl)ethyl]a | 61.15 | 0.44 | 66190-61-2  | 11462401 | TCMSP |
|    |     |          |                          | dehydrocavidine                                       | 38.99 | 0.81 | 83218-34-2  | NA       | TCMSP |
|    |     |          |                          | Dehydrocorybulbine                                    | 46.97 | 0.63 | NA          | 5316439  | TCMSP |
|    |     |          |                          | dehydrocorydaline                                     | 41.98 | 0.68 | 30045-16-0  | 34781    | TCMSP |
|    |     |          |                          | Dehydrocorydalmine                                    | 43.9  | 0.59 | 6877-27-6   | 3083983  | TCMSP |
|    |     |          |                          | demethylcorydalmine                                   | 38.99 | 0.54 | NA          | NA       | TCMSP |
|    |     |          |                          | 13-methyldehydrocorydalmine                           | 35.94 | 0.63 | NA          | 25254728 | TCMSP |
|    |     |          |                          | (1S,8'R)-6,7-dimethoxy-2-methylspiro[3,4-dihydroiso   | 43.95 | 0.72 | 24181-77-9  | 21770852 | TCMSP |
|    |     |          |                          | Izoteolin                                             | 39.53 | 0.51 | 95508-61-5  | 133323   | TCMSP |
|    |     |          |                          | isocorybulbine                                        | 40.18 | 0.66 | 22672-74-8  | NA       | TCMSP |
|    |     |          |                          | leonticine                                            | 45.79 | 0.26 | 2609-29-2   | NA       | TCMSP |
|    |     |          |                          | 13-methylpalmatrubine                                 | 40.97 | 0.63 | NA          | 12275616 | TCMSP |
|    |     |          |                          | N-methylaurotetanine                                  | 41.62 | 0.56 | 2169-44-0   | 6543699  | TCMSP |
|    |     |          |                          | norglaucing                                           | 30.35 | 0.56 | 21848-62-4  | NA       | TCMSP |

|    |     |             |              |                                                      |       |      |             |          |       |
|----|-----|-------------|--------------|------------------------------------------------------|-------|------|-------------|----------|-------|
|    |     |             |              | pontevedrine                                         | 30.28 | 0.71 | 34647-65-9  | NA       | TCMSP |
|    |     |             |              | pseudocoptisine                                      | 38.97 | 0.86 | 19716-67-7  | NA       | TCMSP |
|    |     |             |              | 24240-05-9                                           | 53.75 | 0.83 | 24240-05-9  | NA       | TCMSP |
|    |     |             |              | saualatine                                           | 42.74 | 0.79 | 91897-61-9  | NA       | TCMSP |
|    |     |             |              | stylopine                                            | 48.25 | 0.85 | 4312-32-7   | NA       | TCMSP |
|    |     |             |              | Tetrahydrocorysamine                                 | 34.17 | 0.86 | 32043-26-8  | NA       | TCMSP |
|    |     |             |              | tetrahydroprotopapaverine                            | 57.28 | 0.33 | 26193-25-9  | 40512630 | TCMSP |
|    |     |             |              | ST057701                                             | 31.87 | 0.56 | 5083-88-5   | 6992288  | TCMSP |
|    |     |             |              | 2,3,9,10-tetramethoxy-13-methyl-5,6-dihydroisoquinol | 76.77 | 0.73 | 102421-42-1 | 10362429 | TCMSP |
|    |     |             |              | Stigmasterol                                         | 43.83 | 0.76 | 83-48-7     | 5280794  | TCMSP |
|    |     |             |              | palmatine                                            | 64.6  | 0.65 | 3486-67-7   | 19009    | TCMSP |
|    |     |             |              | Fumarine                                             | 59.26 | 0.83 | 130-86-9    | NA       | TCMSP |
|    |     |             |              | Isocorypalmine                                       | 35.77 | 0.59 | 483-34-1    | 440229   | TCMSP |
|    |     |             |              | bicuculline                                          | 69.67 | 0.88 | 485-49-4    | 10237    | TCMSP |
|    |     |             |              | C09367                                               | 47.54 | 0.69 | 298-45-3    | NA       | TCMSP |
|    |     |             |              | quercetin                                            | 46.43 | 0.28 | 73123-10-1  | 5280343  | TCMSP |
|    |     |             |              | thalicmidine                                         | NA    | NA   | 5883-29-6   | NA       | CSDB  |
|    |     |             |              | bicuculline                                          | 69.67 | 0.88 | NA          | 10237    | CSDB  |
|    |     |             |              | palmatine                                            | 64.6  | 0.65 | 3486-67-7   | 19009    | CSDB  |
|    |     |             |              | dehydroglauanine                                     | NA    | NA   | 22212-26-6  | 398788   | CSDB  |
|    |     |             |              | $\alpha$ -methylisoboldine                           | NA    | NA   | NA          | NA       | CSDB  |
|    |     |             |              | tetrahydrocoptisine                                  | NA    | NA   | 7461-02-1   | 6770     | CSDB  |
|    |     |             |              | tetrahydropalmatine                                  | NA    | NA   | 10097-84-4  | 5417     | CSDB  |
|    |     |             |              | yuanhunine                                           | 24.87 | 0.63 | 104387-15-7 | 128558   | CSDB  |
|    |     |             |              | protopine                                            | NA    | NA   | 130-86-9    | 4970     | CSDB  |
|    |     |             |              | corydaline                                           | 65.84 | 0.68 | NA          | 101301   | CSDB  |
|    |     |             |              | alloycryptopine                                      | NA    | NA   | 24240-04-8  | 98570    | CSDB  |
|    |     |             |              | coryphenanthrine                                     | NA    | NA   | 66190-61-2  | NA       | CSDB  |
|    |     |             |              | isoboldine                                           | 39.53 | 0.51 | NA          | 133323   | CSDB  |
|    |     |             |              | $\beta$ -sitosterol                                  | 36.91 | 0.75 | 83-46-5     | 222284   | CSDB  |
|    |     |             |              | columbamine                                          | 26.94 | 0.59 | 3621-36-1   | 72310    | CSDB  |
|    |     |             |              | nantenine                                            | NA    | NA   | 2565-01-7   | 197001   | CSDB  |
|    |     |             |              | leonticine                                           | NA    | NA   | NA          | 12314123 | CSDB  |
|    |     |             |              | glaucine                                             | 29.03 | 0.61 | NA          | 16754    | CSDB  |
|    |     |             |              | coptisine                                            | NA    | NA   | 3486-66-6   | 72322    | CSDB  |
|    |     |             |              | cryptopine                                           | NA    | NA   | 482-74-6    | 72616    | CSDB  |
|    |     |             |              | corybulbine                                          | NA    | NA   | NA          | 10316181 | CSDB  |
|    |     |             |              | lirioferine                                          | NA    | NA   | NA          | NA       | CSDB  |
|    |     |             |              | $\beta$ -alloycryptopine                             | NA    | NA   | 24240-04-8  | 98570    | CSDB  |
|    |     |             |              | $\alpha$ -alloycryptopine                            | NA    | NA   | NA          | NA       | CSDB  |
|    |     |             |              | (+)-corybulbine                                      | NA    | NA   | NA          | 10316181 | TCMID |
|    |     |             |              | (+)-corydaline                                       | NA    | NA   | NA          | 326549   | TCMID |
|    |     |             |              | (+)-n-methyl laurotetanine                           | NA    | NA   | NA          | 16573    | TCMID |
|    |     |             |              | (?)-tetrahydroberberine                              | NA    | NA   | NA          | 443422   | TCMID |
|    |     |             |              | (?)-tetrahydrocoptisine                              | NA    | NA   | NA          | 697545   | TCMID |
|    |     |             |              | 1-tetrahydropal-matine                               | 73.94 | 0.64 | 84-38-8     | 72301    | TCMID |
|    |     |             |              | alloycryptopine                                      | NA    | NA   | NA          | 98570    | TCMID |
|    |     |             |              | berberine                                            | NA    | NA   | NA          | 10246509 | TCMID |
|    |     |             |              | bicuculline                                          | NA    | NA   | NA          | 6710622  | TCMID |
|    |     |             |              | canadine                                             | NA    | NA   | NA          | 443422   | TCMID |
|    |     |             |              | canaline                                             | NA    | NA   | NA          | 10176161 | TCMID |
|    |     |             |              | columbamine                                          | 26.94 | 0.59 | 3621-36-1   | 72310    | TCMID |
|    |     |             |              | columbianadin                                        | NA    | NA   | NA          | 53399217 | TCMID |
|    |     |             |              | coptisine                                            | NA    | NA   | NA          | 72322    | TCMID |
|    |     |             |              | corchoroside                                         | NA    | NA   | NA          | 56840797 | TCMID |
|    |     |             |              | corycavine                                           | NA    | NA   | NA          | 276145   | TCMID |
|    |     |             |              | corydaline                                           | NA    | NA   | NA          | 9864127  | TCMID |
|    |     |             |              | corydalmine                                          | NA    | NA   | NA          | 5316093  | TCMID |
|    |     |             |              | corydamine                                           | NA    | NA   | NA          | 5316094  | TCMID |
|    |     |             |              | corydine                                             | NA    | NA   | NA          | 111119   | TCMID |
|    |     |             |              | corylidin                                            | NA    | NA   | NA          | 5316096  | TCMID |
|    |     |             |              | corypalmine                                          | NA    | NA   | NA          | 3083926  | TCMID |
|    |     |             |              | corytuberine                                         | NA    | NA   | NA          | 347379   | TCMID |
|    |     |             |              | dehydrocorybulbine                                   | 46.97 | 0.63 | NA          | 5316439  | TCMID |
|    |     |             |              | dehydrocorydaline                                    | 41.98 | 0.68 | 30045-16-0  | 34781    | TCMID |
|    |     |             |              | dehydrocorydalmine                                   | 43.9  | 0.59 | 6877-27-6   | 3083983  | TCMID |
|    |     |             |              | dehydrocostus lactone                                | 61.2  | 0.14 | 74299-48-2  | 11673075 | TCMID |
|    |     |             |              | di-tetrahydropal-matine                              | NA    | NA   | NA          | NA       | TCMID |
|    |     |             |              | fumaricacid                                          | NA    | NA   | NA          | 90471545 | TCMID |
|    |     |             |              | glaucine                                             | NA    | NA   | NA          | 1078819  | TCMID |
|    |     |             |              | glaudine                                             | NA    | NA   | NA          | 12309553 | TCMID |
|    |     |             |              | isocorydine                                          | NA    | NA   | NA          | 6919029  | TCMID |
|    |     |             |              | isocorynoline                                        | NA    | NA   | NA          | 56842002 | TCMID |
|    |     |             |              | isocorypalmine                                       | 35.77 | 0.59 | 483-34-1    | 440229   | TCMID |
|    |     |             |              | isocrotonylpterosin b                                | NA    | NA   | NA          | 5318536  | TCMID |
|    |     |             |              | leonticine                                           | NA    | NA   | NA          | 12314123 | TCMID |
|    |     |             |              | lirioferine                                          | NA    | NA   | NA          | NA       | TCMID |
|    |     |             |              | methyl leptol b                                      | NA    | NA   | NA          | 5319700  | TCMID |
|    |     |             |              | norisocorydine                                       | NA    | NA   | NA          | 5320211  | TCMID |
|    |     |             |              | norjuzunal                                           | NA    | NA   | NA          | 5320212  | TCMID |
|    |     |             |              | palmatine                                            | NA    | NA   | NA          | 200119   | TCMID |
|    |     |             |              | palmidin                                             | NA    | NA   | NA          | 5320384  | TCMID |
|    |     |             |              | protopine                                            | NA    | NA   | NA          | 185559   | TCMID |
|    |     |             |              | protoporphyrin                                       | NA    | NA   | NA          | 53481561 | TCMID |
|    |     |             |              | reticuline                                           | NA    | NA   | NA          | 11968896 | TCMID |
|    |     |             |              | reticuline                                           | 3.22  | 0.33 | 3968-19-2   | 440586   | TCMID |
|    |     |             |              | scoulerine                                           | NA    | NA   | NA          | 1152279  | TCMID |
|    |     |             |              | sculponeata                                          | NA    | NA   | NA          | NA       | TCMID |
|    |     |             |              | stylopine                                            | NA    | NA   | NA          | 697545   | TCMID |
|    |     |             |              | stypandrol                                           | 22.9  | 0.81 | 53052-82-7  | 188516   | TCMID |
|    |     |             |              | tetrahydrocannabinol delta8                          | NA    | NA   | NA          | 22462    | TCMID |
|    |     |             |              | tetrahydrocorysamine                                 | NA    | NA   | NA          | 5321847  | TCMID |
|    |     |             |              | tetrahydrocyperaguinone                              | NA    | NA   | NA          | 5321848  | TCMID |
|    |     |             |              | tetrahydropalmatine                                  | NA    | NA   | NA          | 6602555  | TCMID |
|    |     |             |              | tetrahydropiperic acid                               | 34.6  | 0.1  | NA          | 5321853  | TCMID |
|    |     |             |              | thaliporphine                                        | 31.87 | 0.56 | 5083-88-5   | 6992288  | TCMID |
|    |     |             |              | yuanhunine                                           | NA    | NA   | NA          | 11291216 | TCMID |
|    |     |             |              | yuehchukene                                          | NA    | NA   | NA          | 126009   | TCMID |
| 18 | 水牛角 | Shuiniujiao | Bubali Cornu | aspartate                                            | 79.74 | 0.02 | 6899-03-2   | 5960     | CSDB  |
|    |     |             |              | glycine                                              | NA    | NA   | 56-40-6     | 750      | CSDB  |
|    |     |             |              | alanine                                              | NA    | NA   | 56-41-7     | 5950     | CSDB  |
|    |     |             |              | methionine                                           | NA    | NA   | 59-51-8     | 876      | CSDB  |
|    |     |             |              | serine                                               | NA    | NA   | 6898-95-9   | 617      | CSDB  |
|    |     |             |              | isoleucine                                           | NA    | NA   | 7004-09-3   | 791      | CSDB  |
|    |     |             |              | threonine                                            | NA    | NA   | 72-19-5     | 6288     | CSDB  |
|    |     |             |              | glutamic acid                                        | NA    | NA   | 6899-05-4   | 611      | CSDB  |
|    |     |             |              | phenylalanine                                        | NA    | NA   | 63-91-2     | 6140     | CSDB  |
|    |     |             |              | histidine                                            | NA    | NA   | 71-00-1     | 6274     | CSDB  |
|    |     |             |              | cholesterol                                          | 37.87 | 0.68 | 57-88-5     | 5997     | CSDB  |
|    |     |             |              | cystine                                              | NA    | NA   | 56-89-3     | 67678    | CSDB  |
|    |     |             |              | proline                                              | NA    | NA   | 147-85-3    | 145742   | CSDB  |
|    |     |             |              | lysine                                               | 29.33 | 0.02 | 56-87-1     | 5962     | CSDB  |
|    |     |             |              | tyrosine                                             | NA    | NA   | 60-18-4     | 6057     | CSDB  |
|    |     |             |              | arginine                                             | NA    | NA   | 74-79-3     | 6322     | CSDB  |
|    |     |             |              | 4-guanidino-1-butanol                                | 26.23 | 0.01 | 17581-95-2  | 5317848  | TCMID |
|    |     |             |              | alanine                                              | 87.69 | 0.01 | 115967-49-2 | 7311724  | TCMID |
|    |     |             |              | arginine                                             | NA    | NA   | NA          | 6995104  | TCMID |



|    |    |        |                                   |                                                          |       |      |             |           |       |
|----|----|--------|-----------------------------------|----------------------------------------------------------|-------|------|-------------|-----------|-------|
|    |    |        |                                   | verbenaalin                                              | 12.69 | 0.44 | 548-37-8    | 73467     | CSDB  |
|    |    |        |                                   | verbascoside                                             | 2.94  | 0.62 | 61276-17-3  | 5281800   | CSDB  |
|    |    |        |                                   | stachyose                                                | 3.25  | 0.59 | 470-55-3    | 439531    | CSDB  |
|    |    |        |                                   | lupeol                                                   | 12.12 | 0.78 | 545-47-1    | 259846    | CSDB  |
|    |    |        |                                   | $\beta$ -carotene                                        | 37.18 | 0.58 | 7235-40-7   | 5280489   | CSDB  |
|    |    |        |                                   | aucuboside                                               | 4.17  | 0.33 | 479-98-1    | 91458     | CSDB  |
|    |    |        |                                   | hastatoside                                              | NA    | NA   | 50816-24-5  | 92043450  | CSDB  |
|    |    |        |                                   | artemetin                                                | 49.55 | 0.48 | 479-90-3    | 5320351   | CSDB  |
|    |    |        |                                   | adenosine                                                | 15.98 | 0.18 | 58-61-7     | 60961     | CSDB  |
|    |    |        |                                   | ursolic acid                                             | 16.77 | 0.75 | 77-52-1     | 64945     | CSDB  |
|    |    |        |                                   | 3,4-dihydroverbenalin                                    | NA    | NA   | NA          | 5316746   | TCMID |
|    |    |        |                                   | 7 $\alpha$ ,22s-dihydroxysterol                          | NA    | NA   | NA          | NA        | TCMID |
|    |    |        |                                   | 9-hydroxysemperoside                                     | NA    | NA   | NA          | 101098710 | TCMID |
|    |    |        |                                   | adeninucleoside                                          | 15.98 | 0.18 | 58-61-7     | 60961     | TCMID |
|    |    |        |                                   | adenoside                                                | NA    | NA   | NA          | NA        | TCMID |
|    |    |        |                                   | adenosine                                                | NA    | NA   | NA          | 54732806  | TCMID |
|    |    |        |                                   | artemisin                                                | 49.55 | 0.48 | 479-90-3    | 5320351   | TCMID |
|    |    |        |                                   | cornin                                                   | NA    | NA   | NA          | 273110    | TCMID |
|    |    |        |                                   | cornudentanone                                           | 39.66 | 0.33 | 110979-06-1 | 46191017  | TCMID |
|    |    |        |                                   | dihydroverticillatine                                    | NA    | NA   | NA          | 5316747   | TCMID |
|    |    |        |                                   | hastatoside                                              | NA    | NA   | NA          | 599030    | TCMID |
|    |    |        |                                   | isoorientin                                              | NA    | NA   | NA          | 49852298  | TCMID |
|    |    |        |                                   | orientin                                                 | NA    | NA   | NA          | 44257907  | TCMID |
|    |    |        |                                   | ursolicacid                                              | NA    | NA   | NA          | 45358157  | TCMID |
|    |    |        |                                   | ursolicacid lactone                                      | NA    | NA   | NA          | NA        | TCMID |
|    |    |        |                                   | verbenaalin                                              | NA    | NA   | NA          | 17751048  | TCMID |
|    |    |        |                                   | verbenol                                                 | 52.01 | 0.06 | 19890-02-9  | 88298     | TCMID |
|    |    |        |                                   | vitexin                                                  | NA    | NA   | NA          | 49791957  | TCMID |
| 22 | 藥本 | Gaoben | <i>Ligustici Rhizoma Et Radix</i> | sitosterol                                               | 36.91 | 0.75 | 83-46-5     | 12303645  | TCMSP |
|    |    |        |                                   | 1-ethoxyl-4-methylbenzene                                | 28.17 | 0.02 | 622-60-6    | 73955     | CSDB  |
|    |    |        |                                   | bornyl acetate                                           | 65.52 | 0.08 | 5655-61-8   | 93009     | CSDB  |
|    |    |        |                                   | 4-terpinyl acetate                                       | NA    | NA   | NA          | 20960     | CSDB  |
|    |    |        |                                   | citronellyl acetate                                      | NA    | NA   | NA          | 9017      | CSDB  |
|    |    |        |                                   | limonene                                                 | NA    | NA   | 7705-14-8   | 22311     | CSDB  |
|    |    |        |                                   | $\beta$ -caryophyllene                                   | 29.7  | 0.09 | 87-44-5     | 5281515   | CSDB  |
|    |    |        |                                   | caryophyllene                                            | NA    | NA   | NA          | NA        | CSDB  |
|    |    |        |                                   | 9,12-octadecadienoic acid                                | NA    | NA   | 2197-37-7   | 3931      | CSDB  |
|    |    |        |                                   | cnidilide                                                | 77.55 | 0.07 | 3674-03-1   | 160710    | CSDB  |
|    |    |        |                                   | $\gamma$ -patchoulene                                    | NA    | NA   | 508-55-4    | NA        | CSDB  |
|    |    |        |                                   | verbenone                                                | NA    | NA   | 80-57-9     | 29025     | CSDB  |
|    |    |        |                                   | $\alpha$ -phellandrene                                   | NA    | NA   | 99-83-2     | 7460      | CSDB  |
|    |    |        |                                   | $\beta$ -phellandrene                                    | NA    | NA   | 555-10-2    | 11142     | CSDB  |
|    |    |        |                                   | myrcene                                                  | 24.96 | 0.02 | 123-35-3    | 31253     | CSDB  |
|    |    |        |                                   | nerol propionate                                         | NA    | NA   | NA          | NA        | CSDB  |
|    |    |        |                                   | $\delta$ -guaiene                                        | 23.66 | 0.07 | 3691-11-0   | 94275     | CSDB  |
|    |    |        |                                   | pentylbenzene                                            | 34.34 | 0.03 | 538-68-1    | 10864     | CSDB  |
|    |    |        |                                   | p-methoxyacetophenone                                    | 28.57 | 0.03 | 100-06-1    | 7476      | CSDB  |
|    |    |        |                                   | p-cymol                                                  | 27.2  | 0.02 | 99-87-6     | 7463      | CSDB  |
|    |    |        |                                   | 3-butylidene-4,5-dihydrophthalide                        | 23.5  | 0.07 | 4431-01-0   | 5319022   | CSDB  |
|    |    |        |                                   | 3-butylidene-phthalide                                   | 53.72 | 0.07 | 551-08-6    | 642376    | CSDB  |
|    |    |        |                                   | myristicin                                               | 17.99 | 0.07 | 607-91-0    | 4276      | CSDB  |
|    |    |        |                                   | $\gamma$ -muurolene                                      | NA    | NA   | NA          | NA        | CSDB  |
|    |    |        |                                   | 3-methylbutylisovalerate                                 | 22.26 | 0.03 | 659-70-1    | 12613     | CSDB  |
|    |    |        |                                   | isomyristicin                                            | 46.17 | 0.07 | 487-62-7    | 6436484   | CSDB  |
|    |    |        |                                   | terpinolene                                              | 29.62 | 0.02 | 586-62-9    | 11463     | CSDB  |
|    |    |        |                                   | $\delta$ -selinene                                       | NA    | NA   | NA          | NA        | CSDB  |
|    |    |        |                                   | $\beta$ -sitosterol                                      | 36.91 | 0.75 | 83-46-5     | 222284    | CSDB  |
|    |    |        |                                   | ferulic acid                                             | 39.56 | 0.06 | 1135-24-6   | 445858    | CSDB  |
|    |    |        |                                   | $\alpha$ -terpinene                                      | 33.95 | 0.02 | 99-86-5     | 7462      | CSDB  |
|    |    |        |                                   | $\gamma$ -terpinene                                      | 33.02 | 0.02 | 99-85-4     | 7461      | CSDB  |
|    |    |        |                                   | 4-terpineol                                              | NA    | NA   | 98-55-5     | 17100     | CSDB  |
|    |    |        |                                   | $\alpha$ -terpineol                                      | NA    | NA   | 98-55-5     | 17100     | CSDB  |
|    |    |        |                                   | $\alpha$ -ocimene                                        | NA    | NA   | 502-99-8    | 5320249   | CSDB  |
|    |    |        |                                   | $\alpha$ -farnesene                                      | 21.7  | 0.02 | 502-61-4    | 5281516   | CSDB  |
|    |    |        |                                   | $\beta$ -farnesene                                       | 17.42 | 0.05 | 18794-84-8  | 5281517   | CSDB  |
|    |    |        |                                   | heptanal                                                 | 19.59 | 0.01 | 111-71-7    | 8130      | CSDB  |
|    |    |        |                                   | $\alpha$ -copaene                                        | NA    | NA   | 3856-25-5   | 76319594  | CSDB  |
|    |    |        |                                   | $\gamma$ -cadinene                                       | NA    | NA   | NA          | NA        | CSDB  |
|    |    |        |                                   | cumic acid                                               | 45.78 | 0.04 | 536-66-3    | 10820     | CSDB  |
|    |    |        |                                   | $\alpha$ -cedrene                                        | NA    | NA   | 469-61-4    | 6431015   | CSDB  |
|    |    |        |                                   | carvacrol                                                | 43.28 | 0.03 | 499-75-2    | 10364     | CSDB  |
|    |    |        |                                   | sabinene                                                 | NA    | NA   | 3387-41-5   | 18818     | CSDB  |
|    |    |        |                                   | aromadendrene                                            | 55.74 | 0.1  | 489-39-4    | 11095734  | CSDB  |
|    |    |        |                                   | senkyunolide H                                           | NA    | NA   | 94596-27-7  | 13965088  | CSDB  |
|    |    |        |                                   | $\alpha$ -curcumene                                      | NA    | NA   | 644-30-4    | 92139     | CSDB  |
|    |    |        |                                   | senkyunolide A                                           | 26.56 | 0.07 | 63038-10-8  | 3085257   | CSDB  |
|    |    |        |                                   | senkyunolide G                                           | NA    | NA   | 94530-85-5  | 10013283  | CSDB  |
|    |    |        |                                   | senkyunolide I                                           | 26.78 | 0.1  | 94596-28-8  | 11521428  | CSDB  |
|    |    |        |                                   | myrtenol                                                 | NA    | NA   | 515-00-4    | 10582     | CSDB  |
|    |    |        |                                   | himachalene                                              | NA    | NA   | 19419-67-1  | 11458355  | CSDB  |
|    |    |        |                                   | geraniol                                                 | 23.93 | 0.02 | 106-24-1    | 637566    | CSDB  |
|    |    |        |                                   | geranial                                                 | 22.52 | 0.02 | 141-27-5    | 638011    | CSDB  |
|    |    |        |                                   | 3-carene                                                 | NA    | NA   | 13466-78-9  | 26049     | CSDB  |
|    |    |        |                                   | $\alpha$ -humulene                                       | 22.98 | 0.06 | 6753-98-6   | 5281520   | CSDB  |
|    |    |        |                                   | $\alpha$ -pinene                                         | NA    | NA   | 80-56-8     | 6654      | CSDB  |
|    |    |        |                                   | elemicin                                                 | 21.94 | 0.06 | 487-11-6    | 10248     | CSDB  |
|    |    |        |                                   | $\alpha$ -elemene                                        | 21.72 | 0.06 | NA          | 80048     | CSDB  |
|    |    |        |                                   | $\beta$ -elemene                                         | NA    | NA   | NA          | 10583     | CSDB  |
|    |    |        |                                   | $\delta$ -elemene                                        | NA    | NA   | NA          | NA        | CSDB  |
|    |    |        |                                   | neocnidilide                                             | 65.03 | 0.07 | 4567-33-3   | 3083857   | CSDB  |
|    |    |        |                                   | sucrose                                                  | 7.17  | 0.23 | NA          | 5988      | CSDB  |
|    |    |        |                                   | piperitenone                                             | 40.05 | 0.03 | 491-09-8    | 381152    | CSDB  |
|    |    |        |                                   | camphor                                                  | NA    | NA   | 76-22-2     | 2537      | CSDB  |
|    |    |        |                                   | camphene                                                 | NA    | NA   | 79-92-5     | 6616      | CSDB  |
|    |    |        |                                   | neral                                                    | 19.48 | 0.02 | 106-26-3    | 643779    | CSDB  |
|    |    |        |                                   | citral-b                                                 | 19.48 | 0.02 | 106-26-3    | 643779    | CSDB  |
|    |    |        |                                   | lavandulol                                               | 38.55 | 0.02 | NA          | 5464156   | CSDB  |
|    |    |        |                                   | ligustilide                                              | 23.5  | 0.07 | 4431-01-0   | 5319022   | CSDB  |
|    |    |        |                                   | $\gamma$ -himachalene                                    | 46.62 | 0.08 | 53111-25-4  | 6428535   | CSDB  |
|    |    |        |                                   | $\beta$ -bulnesene                                       | NA    | NA   | 3772-93-8   | 12302132  | CSDB  |
|    |    |        |                                   | $\alpha$ -curcumene( R-)                                 | 4.68  | 0.06 | 4176-17-4   | 442360    | CSDB  |
|    |    |        |                                   | $\alpha$ -curcumene( S-)                                 | 26.56 | 0.06 | 4176-06-1   | 3083834   | CSDB  |
|    |    |        |                                   | 4-terpineol                                              | NA    | NA   | 562-74-3    | 11230     | CSDB  |
|    |    |        |                                   | 2,3-dihydro-4,6,8-trimethyl-(2H)-naphthalenone           | NA    | NA   | NA          | NA        | CSDB  |
|    |    |        |                                   | 2,3-dihydro-4-methylfuran                                | 97.97 | 0.01 | NA          | 36744     | CSDB  |
|    |    |        |                                   | 1,4-undecadiene                                          | 18.3  | 0.02 | 53786-93-9  | 5358328   | CSDB  |
|    |    |        |                                   | p-methoxyacetophenol                                     | NA    | NA   | NA          | NA        | CSDB  |
|    |    |        |                                   | dimethyl p-phthalate                                     | 25.49 | 0.06 | NA          | 8441      | CSDB  |
|    |    |        |                                   | $\beta$ -ocimene- Y                                      | NA    | NA   | NA          | NA        | CSDB  |
|    |    |        |                                   | $\beta$ -cadinene                                        | 17.12 | 0.08 | NA          | 10657     | CSDB  |
|    |    |        |                                   | cis-di-hydroxyligustilide                                | NA    | NA   | NA          | NA        | CSDB  |
|    |    |        |                                   | trans-di-hydroxyligustilide                              | NA    | NA   | NA          | NA        | CSDB  |
|    |    |        |                                   | (e)-3-methoxy-4,5-methylenedioxy-cinnamaldehyde          | NA    | NA   | NA          | 124355976 | TCMID |
|    |    |        |                                   | (z)-4,5-dihydro-6,7-cis-dihydroxy-3-butylidene-phthalide | NA    | NA   | NA          | 5321251   | TCMID |
|    |    |        |                                   | 2-(butyn-2-ylidene)-delta3-dihydrofuran[5-spiro-2&#3     | NA    | NA   | NA          | NA        | TCMID |
|    |    |        |                                   | 3-butyl-phthalide                                        | NA    | NA   | NA          | 61361     | TCMID |
|    |    |        |                                   | 6-methoxy-7,8-methylenedioxy coumarin                    | 28.61 | 0.13 | NA          | 5319474   | TCMID |

|    |    |          |                         |                                                      |       |      |             |           |       |
|----|----|----------|-------------------------|------------------------------------------------------|-------|------|-------------|-----------|-------|
|    |    |          |                         | chromone                                             | NA    | NA   | NA          | 10286     | TCMID |
|    |    |          |                         | cnidilide                                            | 77.55 | 0.07 | 648002      | 160710    | TCMID |
|    |    |          |                         | cnidilin                                             | NA    | NA   | NA          | 53398727  | TCMID |
|    |    |          |                         | coniselin                                            | NA    | NA   | NA          | 5316047   | TCMID |
|    |    |          |                         | dacursin                                             | NA    | NA   | NA          | NA        | TCMID |
|    |    |          |                         | ferulic acid                                         | 39.56 | 0.06 | 537-98-4    | 445858    | TCMID |
|    |    |          |                         | isomyristicin                                        | 46.17 | 0.07 | 18312-21-5  | 6436484   | TCMID |
|    |    |          |                         | lavandulol                                           | 38.55 | 0.02 | 21090-68-6  | 5464156   | TCMID |
|    |    |          |                         | lignoceric acid                                      | NA    | NA   | NA          | 5461021   | TCMID |
|    |    |          |                         | ligustilide                                          | 23.5  | 0.07 | 4431-01-0   | 5319022   | TCMID |
|    |    |          |                         | ligustilone                                          | NA    | NA   | NA          | 26238732  | TCMID |
|    |    |          |                         | myristicin                                           | 17.99 | 0.07 | 607-91-0    | 4276      | TCMID |
|    |    |          |                         | neocnidilide                                         | NA    | NA   | NA          | 5320063   | TCMID |
|    |    |          |                         | palmitic acid                                        | NA    | NA   | NA          | 18413781  | TCMID |
|    |    |          |                         | senkyunolide g                                       | NA    | NA   | NA          | 10013283  | TCMID |
|    |    |          |                         | senkyunolide h                                       | 26.78 | 0.1  | 94596-27-7  | 11521428  | TCMID |
| 23 | 党参 | Dangshen | <i>Codonopsis Radix</i> | poriferasta-7,22E-dien-3beta-ol                      | 42.98 | 0.76 | 481-18-5    | 5283663   | TCMSP |
|    |    |          |                         | Perlolylrine                                         | 65.95 | 0.27 | 29700-20-7  | 160179    | TCMSP |
|    |    |          |                         | Diop                                                 | 43.59 | 0.39 | 25103-50-8  | 33934     | TCMSP |
|    |    |          |                         | ZINC03978781                                         | 43.83 | 0.76 | 19716-26-8  | 11870462  | TCMSP |
|    |    |          |                         | Stigmasterol                                         | 43.83 | 0.76 | 83-48-7     | 5280794   | TCMSP |
|    |    |          |                         | 7-Methoxy-2-methyl isoflavone                        | 42.56 | 0.2  | 19725-44-1  | 354368    | TCMSP |
|    |    |          |                         | Spinasterol                                          | 42.98 | 0.76 | 481-18-5    | 5281331   | TCMSP |
|    |    |          |                         | Chrysanthemaxanthin                                  | 38.72 | 0.58 | 26989-20-8  | NA        | TCMSP |
|    |    |          |                         | Frutinone A                                          | 65.9  | 0.34 | 38210-27-4  | 441965    | TCMSP |
|    |    |          |                         | luteolin                                             | 36.16 | 0.25 | 491-70-3    | 5280445   | TCMSP |
|    |    |          |                         | Taraxerol                                            | 38.4  | 0.77 | 22076-46-6  | 92097     | TCMSP |
|    |    |          |                         | stigmast-7-enol                                      | 37.42 | 0.75 | 481-19-6    | 12315384  | TCMSP |
|    |    |          |                         | 3-beta-Hydroxymethylenetanshiquinone                 | 32.16 | 0.41 | NA          | 5318290   | TCMSP |
|    |    |          |                         | methyl icoso-11,14-dienoate                          | 39.67 | 0.23 | 2463-02-7   | 5365566   | TCMSP |
|    |    |          |                         | 5alpha-Stigmastan-3,6-dione                          | 33.12 | 0.79 | NA          | NA        | TCMSP |
|    |    |          |                         | 7-(beta-Xylosyl)cephalomannine_qt                    | 38.33 | 0.29 | NA          | NA        | TCMSP |
|    |    |          |                         | Daturilin                                            | 50.37 | 0.77 | 111950-78-8 | NA        | TCMSP |
|    |    |          |                         | glycitein                                            | 50.48 | 0.24 | 40957-83-3  | 5317750   | TCMSP |
|    |    |          |                         | Spinoside A                                          | 39.97 | 0.4  | 524-40-3    | NA        | TCMSP |
|    |    |          |                         | (8S,9S,10R,13R,14S,17R)-17-[(E,2R,5S)-5-ethyl-6-n    | 45.4  | 0.76 | 6869-99-4   | 14807783  | TCMSP |
|    |    |          |                         | 11-Hydroxyrankinidine                                | 40    | 0.66 | 122590-03-8 | NA        | TCMSP |
|    |    |          |                         | methyl palmitate                                     | 18.09 | 0.12 | 112-39-0    | 8181      | CSDB  |
|    |    |          |                         | tangshenosideII                                      | 19.5  | 0.32 | 117259-33-3 | 14135593  | CSDB  |
|    |    |          |                         | tangshenosideI                                       | NA    | NA   | 117278-74-7 | 6441191   | CSDB  |
|    |    |          |                         | taraxerol                                            | 38.4  | 0.77 | 127-22-0    | 92097     | CSDB  |
|    |    |          |                         | (E)-2-hexenyl-beta-sophoroside                       | NA    | NA   | 129277-34-5 | NA        | CSDB  |
|    |    |          |                         | tangshenosideIII                                     | NA    | NA   | 129277-39-0 | 11968970  | CSDB  |
|    |    |          |                         | tangshenosideIV                                      | NA    | NA   | 129277-40-3 | 102056192 | CSDB  |
|    |    |          |                         | syringaldehyde                                       | 67.06 | 0.05 | 134-96-3    | 8655      | CSDB  |
|    |    |          |                         | (6R,7R)-E,E-tetradeca-4,12-dien-8,10-diyne-1,6,7-tri | NA    | NA   | 136085-37-5 | 53486204  | CSDB  |
|    |    |          |                         | codopiloic acid                                      | 57.5  | 0.02 | 136945-75-0 | 178371    | CSDB  |
|    |    |          |                         | arabinose                                            | NA    | NA   | 147-81-9    | 854       | CSDB  |
|    |    |          |                         | proline                                              | NA    | NA   | 147-85-3    | 145742    | CSDB  |
|    |    |          |                         | 7-stigmastan-3-one                                   | NA    | NA   | 18069-96-0  | 5748344   | CSDB  |
|    |    |          |                         | stigmasterol-beta-glucoside                          | 21.32 | 0.63 | 19716-26-8  | 6602508   | CSDB  |
|    |    |          |                         | taraxerol acetate                                    | 9.59  | 0.74 | 2189-80-2   | 94225     | CSDB  |
|    |    |          |                         | stigmasta-7,22-dien-3-one                            | NA    | NA   | 23455-44-9  | 21159864  | CSDB  |
|    |    |          |                         | 11,14-eicosadienoic acid methyl ester                | 39.67 | 0.23 | 2463-02-7   | 5365566   | CSDB  |
|    |    |          |                         | perlolylrine                                         | 65.95 | 0.27 | 29700-20-7  | 160179    | CSDB  |
|    |    |          |                         | D-mannose                                            | 1.76  | 0.03 | 3458-28-4   | 161658    | CSDB  |
|    |    |          |                         | delta-guaiene                                        | 23.66 | 0.07 | 3691-11-0   | 94275     | CSDB  |
|    |    |          |                         | beta-bulnesene                                       | NA    | NA   | 3772-93-8   | 12302132  | CSDB  |
|    |    |          |                         | alpha-curcumene( S-)                                 | 26.56 | 0.06 | 4176-06-1   | 3083834   | CSDB  |
|    |    |          |                         | alpha-curcumene( R-)                                 | 4.68  | 0.06 | 4176-17-4   | 442360    | CSDB  |
|    |    |          |                         | stigmasta-7,22-dien-3beta-ol                         | 42.98 | 0.76 | 481-18-5    | 5281331   | CSDB  |
|    |    |          |                         | stigmast-7-enol                                      | 13.01 | 0.76 | 481-19-6    | 12303924  | CSDB  |
|    |    |          |                         | friedelin                                            | 29.16 | 0.76 | 559-74-0    | 91472     | CSDB  |
|    |    |          |                         | glycine                                              | NA    | NA   | 56-40-6     | 750       | CSDB  |
|    |    |          |                         | alanine                                              | NA    | NA   | 56-41-7     | 5950      | CSDB  |
|    |    |          |                         | lysine                                               | 29.33 | 0.02 | 56-87-1     | 5962      | CSDB  |
|    |    |          |                         | cystine                                              | NA    | NA   | 56-89-3     | 67678     | CSDB  |
|    |    |          |                         | fructose                                             | 1.68  | 0.03 | 57-48-7     | 5984      | CSDB  |
|    |    |          |                         | xylose                                               | 51.08 | 0.02 | 58-86-6     | 644160    | CSDB  |
|    |    |          |                         | n-hexyl-beta-D-glucopyranoside                       | 15.6  | 0.11 | 59080-45-4  | 181215    | CSDB  |
|    |    |          |                         | galactose                                            | NA    | NA   | 59-23-4     | 6036      | CSDB  |
|    |    |          |                         | methionine                                           | NA    | NA   | 59-51-8     | 876       | CSDB  |
|    |    |          |                         | niacin                                               | 47.65 | 0.02 | 59-67-6     | 938       | CSDB  |
|    |    |          |                         | tyrosine                                             | NA    | NA   | 60-18-4     | 6057      | CSDB  |
|    |    |          |                         | choline                                              | 0.47  | 0.01 | 62-49-7     | 305       | CSDB  |
|    |    |          |                         | phenylalanine                                        | NA    | NA   | 63-91-2     | 6140      | CSDB  |
|    |    |          |                         | alpha-curcumene                                      | NA    | NA   | 644-30-4    | 92139     | CSDB  |
|    |    |          |                         | 5-hydroxymethylfurfural                              | 45.07 | 0.02 | 67-47-0     | 237332    | CSDB  |
|    |    |          |                         | 2,4-nonadienal                                       | 19.03 | 0.02 | 6750-03-4   | 5283339   | CSDB  |
|    |    |          |                         | serine                                               | NA    | NA   | 6898-95-9   | 617       | CSDB  |
|    |    |          |                         | aspartate                                            | NA    | NA   | 6899-03-2   | 5960      | CSDB  |
|    |    |          |                         | glutamic acid                                        | NA    | NA   | 6899-05-4   | 611       | CSDB  |
|    |    |          |                         | isoleucine                                           | NA    | NA   | 7004-09-3   | 791       | CSDB  |
|    |    |          |                         | histidine                                            | NA    | NA   | 71-00-1     | 6274      | CSDB  |
|    |    |          |                         | valine                                               | NA    | NA   | 72-18-4     | 6287      | CSDB  |
|    |    |          |                         | threonine                                            | NA    | NA   | 72-19-5     | 6288      | CSDB  |
|    |    |          |                         | atractylenolideIII                                   | 68.11 | 0.17 | 73030-71-4  | 155948    | CSDB  |
|    |    |          |                         | atractylenolideII                                    | 47.5  | 0.15 | 73069-14-4  | 14448070  | CSDB  |
|    |    |          |                         | arginine                                             | NA    | NA   | 74-79-3     | 6322      | CSDB  |
|    |    |          |                         | alpha-pinene                                         | NA    | NA   | 80-56-8     | 6654      | CSDB  |
|    |    |          |                         | 1-(5-hydroxymethyl-2-furyl)-9H-pyrido[3,4-b]indole   | NA    | NA   | 827-35-1    | NA        | CSDB  |
|    |    |          |                         | stigmasterol                                         | 43.83 | 0.76 | 83-48-7     | 5280794   | CSDB  |
|    |    |          |                         | 2-furan carboxylic acid                              | NA    | NA   | 88-14-2     | 6949      | CSDB  |
|    |    |          |                         | inulin                                               | NA    | NA   | 9005-80-5   | 6172      | CSDB  |
|    |    |          |                         | ethylalpha-D-fructofuranoside                        | NA    | NA   | NA          | NA        | CSDB  |
|    |    |          |                         | syringin eleutheroside B                             | 14.64 | 0.32 | NA          | 5316860   | CSDB  |
|    |    |          |                         | hexyl-beta-gentiobioside                             | NA    | NA   | NA          | NA        | CSDB  |
|    |    |          |                         | hexyl-beta-soporoside                                | NA    | NA   | NA          | NA        | CSDB  |
|    |    |          |                         | borneol                                              | NA    | NA   | NA          | 64685     | CSDB  |
|    |    |          |                         | stigmasta-5,22-dien-3-one                            | NA    | NA   | NA          | 129669142 | CSDB  |
|    |    |          |                         | o-(o-methoxyphenoxy)phenol                           | 50.75 | 0.09 | NA          | 572803    | CSDB  |
|    |    |          |                         | ribose                                               | NA    | NA   | NA          | 10975657  | CSDB  |
|    |    |          |                         | 5-hydroxy-2-pyridine methanol                        | 47.53 | 0.02 | NA          | 419490    | CSDB  |
|    |    |          |                         | D-glucose                                            | NA    | NA   | NA          | 5793      | CSDB  |
|    |    |          |                         | pyroglutamic acid N-fructoside                       | NA    | NA   | NA          | NA        | CSDB  |
|    |    |          |                         | rhamnose                                             | NA    | NA   | NA          | 25310     | CSDB  |
|    |    |          |                         | ethylbeta-D-fructofuranoside                         | NA    | NA   | NA          | NA        | CSDB  |
|    |    |          |                         | 5-methoxymethyl-2-furaldehyde                        | 28.23 | 0.02 | NA          | 74711     | CSDB  |
|    |    |          |                         | Delta7-stigmastanol-beta-D-glucopyranoside           | NA    | NA   | NA          | NA        | CSDB  |
|    |    |          |                         | alpha-spinasteryl-beta-D-glucoside                   | NA    | NA   | NA          | NA        | CSDB  |
|    |    |          |                         | n-butyl allophanate                                  | NA    | NA   | NA          | 5315565   | CSDB  |
|    |    |          |                         | (?)-nicotine                                         | 77.67 | 0.04 | 54-11-5     | 89594     | TCMID |
|    |    |          |                         | 1,22-docosanediol                                    | 12.59 | 0.26 | 22513-81-1  | 347359    | TCMID |
|    |    |          |                         | 1,5-di-isobutyl-3,3-dimethyl[3,1,0]cyclohexa-dione   | NA    | NA   | NA          | 5316846   | TCMID |
|    |    |          |                         | 1-ethyl-beta-d-galactoside                           | NA    | NA   | NA          | 5317246   | TCMID |
|    |    |          |                         | 1-heptadecanol                                       | NA    | NA   | NA          | 10015395  | TCMID |
|    |    |          |                         | 1-methyl naphthalene                                 | 39.01 | 0.04 | 78900-94-4  | 7002      | TCMID |

|  |  |  |                                                      |       |      |             |           |       |
|--|--|--|------------------------------------------------------|-------|------|-------------|-----------|-------|
|  |  |  | 1-pentadecene                                        | 17.72 | 0.05 | 27251-68-9  | 25913     | TCMID |
|  |  |  | 1-peroxyferolide                                     | NA    | NA   | NA          | 442290    | TCMID |
|  |  |  | 11-hydroxyrankinidine                                | NA    | NA   | NA          | 5318332   | TCMID |
|  |  |  | 12-o-nicotinoylisolineolone                          | NA    | NA   | NA          | 5320138   | TCMID |
|  |  |  | 13-methyl pentadecanoic acid                         | NA    | NA   | NA          | 146501    | TCMID |
|  |  |  | 14-methyl hexadecanoic acid                          | NA    | NA   | NA          | 164860    | TCMID |
|  |  |  | 2,4,4-trimethyl-1-pentene                            | NA    | NA   | NA          | 7868      | TCMID |
|  |  |  | 2,4-nonadienal                                       | 19.03 | 0.02 | 6750-03-4   | 5283339   | TCMID |
|  |  |  | 2,4-nonadienic acid                                  | NA    | NA   | NA          | NA        | TCMID |
|  |  |  | 2,6,10,14-tetramethyl hexadecane                     | NA    | NA   | NA          | 3042238   | TCMID |
|  |  |  | 2,6-nonadienol                                       | NA    | NA   | NA          | 5362833   | TCMID |
|  |  |  | 2-furan-carboxylate                                  | NA    | NA   | NA          | NA        | TCMID |
|  |  |  | 2-furancarboxylic acid                               | 35.66 | 0.02 | 26447-28-9  | 6919      | TCMID |
|  |  |  | 20-hexadecanoylgenol                                 | NA    | NA   | NA          | 5318035   | TCMID |
|  |  |  | 22-dine-3-one                                        | NA    | NA   | NA          | 9883806   | TCMID |
|  |  |  | 3-beta-hydroxymethyltenanshiquinone                  | NA    | NA   | NA          | NA        | TCMID |
|  |  |  | 3-methyl heptane                                     | NA    | NA   | NA          | NA        | TCMID |
|  |  |  | 3-methyl-3-hexanol                                   | NA    | NA   | NA          | 11708     | TCMID |
|  |  |  | 3-methylcarbazole                                    | 20.14 | 0.09 | 4630-20-0   | 20746     | TCMID |
|  |  |  | 4-methylsulfinyl butyl isothiocyanate                | NA    | NA   | NA          | 5350      | TCMID |
|  |  |  | 4-phenylbicyclo[2,2,2]octan-1-ol                     | 25.07 | 0.09 | 2001-62-9   | 327096    | TCMID |
|  |  |  | 5-hydroxy-2-pyridinemethanol                         | 47.53 | 0.02 | 40222-77-3  | 419490    | TCMID |
|  |  |  | 5-hydroxymethyl furadehyde                           | NA    | NA   | NA          | NA        | TCMID |
|  |  |  | 5-hydroxymethyl furaldehyde                          | NA    | NA   | NA          | NA        | TCMID |
|  |  |  | 5-methoxy-3-(2-phenyl-e-e-ethenyl)-2,4-bis(4-hydroxy | 11.33 | 0.66 | 152383-83-0 | 5319481   | TCMID |
|  |  |  | 5-methoxyfuraldehyde                                 | NA    | NA   | NA          | 6208      | TCMID |
|  |  |  | 5-methoxyfuraldehyde3                                | NA    | NA   | NA          | NA        | TCMID |
|  |  |  | 5-methoxymethyl furfural                             | 28.23 | 0.02 | 1917-64-2   | 74711     | TCMID |
|  |  |  | 5alpha-stigmastan-3,6-dione                          | NA    | NA   | NA          | 10025616  | TCMID |
|  |  |  | 5alpha-stigmasta-7,22-dien-3-one                     | NA    | NA   | NA          | 21159864  | TCMID |
|  |  |  | 6,6,6-trimethyl-2,2-dimethoxygossypol                | 8.93  | 0.86 | NA          | 5316861   | TCMID |
|  |  |  | 7-(beta-xylosyl)cephalomannine                       | NA    | NA   | NA          | NA        | TCMID |
|  |  |  | 7-methoxy-2-methyl isoflavone                        | 42.56 | 0.2  | 19725-44-1  | 354368    | TCMID |
|  |  |  | 7-stigmastenol-3-o-beta-d-glucoside                  | 20.67 | 0.62 | 61376-86-1  | 124879    | TCMID |
|  |  |  | 7-stigmastanone-3                                    | NA    | NA   | NA          | 5748344   | TCMID |
|  |  |  | 7alpha-l-rhamnosyl-6-methoxylutcolin                 | NA    | NA   | NA          | NA        | TCMID |
|  |  |  | 8alpha-methoxyfuranodiene                            | NA    | NA   | NA          | 6325622   | TCMID |
|  |  |  | alpha-curcumene                                      | 26.56 | 0.06 | 4176-06-1   | 3083834   | TCMID |
|  |  |  | alpha-pinene                                         | 46.25 | 0.05 | 7785-70-8   | 82227     | TCMID |
|  |  |  | alpha-spinasterol                                    | 42.98 | 0.76 | 481-18-5    | 5281331   | TCMID |
|  |  |  | alpha-spinasterol-beta-d-glucoside                   | NA    | NA   | NA          | 11968950  | TCMID |
|  |  |  | alpha-stigmasta-7,22-dien-3-one                      | NA    | NA   | NA          | 21159864  | TCMID |
|  |  |  | alpha-stigmastenol-beta-d-glucoside                  | NA    | NA   | NA          | 101689889 | TCMID |
|  |  |  | atractylenolide ii                                   | NA    | NA   | NA          | 11736433  | TCMID |
|  |  |  | atractylenolide iii                                  | NA    | NA   | NA          | 11311230  | TCMID |
|  |  |  | atractylnolide ii                                    | 47.5  | 0.15 | 73069-14-4  | 14448070  | TCMID |
|  |  |  | azelaic acid                                         | NA    | NA   | NA          | 3801344   | TCMID |
|  |  |  | azelaic acid                                         | NA    | NA   | NA          | 2266      | TCMID |
|  |  |  | beta-curcumene                                       | NA    | NA   | NA          | 14014430  | TCMID |
|  |  |  | beta-pinene                                          | NA    | NA   | NA          | 14896     | TCMID |
|  |  |  | borneol                                              | NA    | NA   | NA          | 44630107  | TCMID |
|  |  |  | butyl-cyclohexane                                    | 35.68 | 0.02 | 1678-93-9   | 15506     | TCMID |
|  |  |  | caproic acid                                         | 73.08 | 0.01 | 142-62-1    | 8892      | TCMID |
|  |  |  | caprylic acid                                        | NA    | NA   | NA          | 23664772  | TCMID |
|  |  |  | caprylic acid                                        | 16.4  | 0.02 | 68937-74-6  | 379       | TCMID |
|  |  |  | capsaicin(e)                                         | NA    | NA   | NA          | 2548      | TCMID |
|  |  |  | choline                                              | 0.47  | 0.01 | 62-49-7     | 305       | TCMID |
|  |  |  | chrysanthemaxanthin                                  | NA    | NA   | NA          | 5376313   | TCMID |
|  |  |  | codonolactone                                        | 68.11 | 0.17 | 73030-71-4  | 155948    | TCMID |
|  |  |  | codonopsine                                          | 45.83 | 0.13 | 26989-20-8  | 442631    | TCMID |
|  |  |  | codonopyrrolidium b                                  | NA    | NA   | NA          | 25130789  | TCMID |
|  |  |  | codopiloic acid                                      | 57.5  | 0.02 | 136945-75-0 | 178371    | TCMID |
|  |  |  | codpiloic acid                                       | 57.5  | 0.02 | 136945-75-1 | 178371    | TCMID |
|  |  |  | coelogen                                             | NA    | NA   | NA          | 442697    | TCMID |
|  |  |  | daturic acid                                         | 18.51 | 0.12 | 67701-03-5  | 10465     | TCMID |
|  |  |  | daturilin                                            | NA    | NA   | NA          | 71718229  | TCMID |
|  |  |  | delta22-stigmasterol                                 | NA    | NA   | NA          | 123468606 | TCMID |
|  |  |  | delta7-stigmastenol                                  | 37.42 | 0.75 | 521-03-9    | 441837    | TCMID |
|  |  |  | delta7-stigmastanone-3                               | NA    | NA   | NA          | 3082125   | TCMID |
|  |  |  | diisocapryl phthalate                                | 43.59 | 0.39 | 25103-50-8  | 33934     | TCMID |
|  |  |  | dl-syngaresinol                                      | 3.29  | 0.72 | 21453-69-0  | 11604108  | TCMID |
|  |  |  | docosane                                             | 8.37  | 0.18 | 629-97-0    | 12405     | TCMID |
|  |  |  | eicosane                                             | 17.74 | 0.01 | 63335-87-5  | 15600     | TCMID |
|  |  |  | emodin                                               | NA    | NA   | NA          | 25201450  | TCMID |
|  |  |  | enanthic acid                                        | 13.38 | 0.01 | 111-14-8    | 8094      | TCMID |
|  |  |  | encecalin                                            | 21.36 | 0.11 | 20628-09-5  | 114703    | TCMID |
|  |  |  | ethyl caprylate                                      | NA    | NA   | NA          | 11052132  | TCMID |
|  |  |  | ethyl palmitate                                      | 18.99 | 0.14 | 628-97-7    | 12366     | TCMID |
|  |  |  | ethyl-alpha-d-fructofuranoside                       | NA    | NA   | NA          | 6325163   | TCMID |
|  |  |  | ethyl-p-digallate                                    | 2.27  | 0.31 | NA          | 5317260   | TCMID |
|  |  |  | ethyl-alpha-d-fructoside                             | NA    | NA   | NA          | NA        | TCMID |
|  |  |  | ethylpalmitate                                       | 18.99 | 0.14 | 628-97-7    | 12366     | TCMID |
|  |  |  | ferulic acid                                         | 39.56 | 0.06 | 537-98-4    | 445858    | TCMID |
|  |  |  | friedelan-3-one                                      | NA    | NA   | NA          | 244297    | TCMID |
|  |  |  | friedelin                                            | NA    | NA   | NA          | 11870449  | TCMID |
|  |  |  | fritillaziebinol                                     | NA    | NA   | NA          | 24893863  | TCMID |
|  |  |  | fructose                                             | NA    | NA   | NA          | 56947165  | TCMID |
|  |  |  | frutinone                                            | 65.9  | 0.34 | 38210-27-4  | 441965    | TCMID |
|  |  |  | furanodiene                                          | NA    | NA   | NA          | 5317424   | TCMID |
|  |  |  | geniposide                                           | NA    | NA   | NA          | 45358128  | TCMID |
|  |  |  | glycine                                              | NA    | NA   | NA          | 44570740  | TCMID |
|  |  |  | glycitein                                            | NA    | NA   | NA          | 11994876  | TCMID |
|  |  |  | guajaverin                                           | NA    | NA   | NA          | 44259215  | TCMID |
|  |  |  | heneicosane                                          | 8.41  | 0.15 | 629-94-7    | 12403     | TCMID |
|  |  |  | heneicosanoic acid                                   | 16.14 | 0.23 | 2363-71-5   | 16898     | TCMID |
|  |  |  | heneicosanoic acid                                   | NA    | NA   | NA          | 16898     | TCMID |
|  |  |  | hentriacontane                                       | 8.07  | 0.51 | 630-04-6    | 12410     | TCMID |
|  |  |  | heptadecane                                          | 8.64  | 0.07 | 629-78-7    | 12398     | TCMID |
|  |  |  | hexadecanoic acid                                    | NA    | NA   | NA          | 520159    | TCMID |
|  |  |  | hexanoic acid                                        | NA    | NA   | NA          | 6426853   | TCMID |
|  |  |  | Hexyl b-D-glucopyranoside                            | 15.6  | 0.11 | 59080-45-4  | 181215    | TCMID |
|  |  |  | hexyl-beta-d-glucopyranosyl-(1-2)-beta-d-glucopyran  | NA    | NA   | NA          | NA        | TCMID |
|  |  |  | inulin                                               | NA    | NA   | NA          | 44630352  | TCMID |
|  |  |  | lauric aldehyde                                      | 21.52 | 0.03 | 112-54-9    | 8194      | TCMID |
|  |  |  | lauric acid                                          | 23.59 | 0.04 | 8045-27-0   | 3893      | TCMID |
|  |  |  | lobetyolin                                           | NA    | NA   | NA          | 53486204  | TCMID |
|  |  |  | lobetyolinin                                         | NA    | NA   | NA          | 5459227   | TCMID |
|  |  |  | mannose                                              | NA    | NA   | NA          | 24749     | TCMID |
|  |  |  | mannose-b                                            | 43.04 | 0.04 | 7322-31-8   | 439680    | TCMID |
|  |  |  | menthyl acetate                                      | NA    | NA   | NA          | 220674    | TCMID |
|  |  |  | methionine                                           | 70.87 | 0.01 | 26062-47-5  | 6992087   | TCMID |
|  |  |  | methionine sulfoxide                                 | NA    | NA   | NA          | 56932118  | TCMID |
|  |  |  | methyl caprylate                                     | 18.71 | 0.02 | 111-11-5    | 8091      | TCMID |
|  |  |  | methyl myristate                                     | 19.68 | 0.08 | 124-10-7    | 31284     | TCMID |
|  |  |  | methyl octadecadienoate                              | 41.93 | 0.17 | 112-63-0    | 5284421   | TCMID |
|  |  |  | methyl octadecanoate                                 | NA    | NA   | NA          | 8201      | TCMID |
|  |  |  | methyl palmitate                                     | NA    | NA   | NA          | 10378565  | TCMID |



|    |     |        |                   |                                                       |       |      |             |           |       |
|----|-----|--------|-------------------|-------------------------------------------------------|-------|------|-------------|-----------|-------|
|    |     |        |                   | methyl pentadecanoate                                 | NA    | NA   | NA          | 91424     | TCMID |
|    |     |        |                   | methyl stearate                                       | 16.8  | 0.16 | 112-61-8    | 8201      | TCMID |
|    |     |        |                   | methyl tetradecanoate                                 | NA    | NA   | NA          | 11779960  | TCMID |
|    |     |        |                   | methylhexadecanoate                                   | NA    | NA   | NA          | NA        | TCMID |
|    |     |        |                   | myristic acid                                         | NA    | NA   | NA          | 23440040  | TCMID |
|    |     |        |                   | myristicin                                            | 17.99 | 0.07 | 607-91-0    | 4276      | TCMID |
|    |     |        |                   | n-butyl allophanate                                   | NA    | NA   | NA          | 5315565   | TCMID |
|    |     |        |                   | n-butyl-allophanate                                   | NA    | NA   | NA          | NA        | TCMID |
|    |     |        |                   | n-hexyl-beta-d-glucopyranoside                        | NA    | NA   | NA          | 24802191  | TCMID |
|    |     |        |                   | n-nonadecane                                          | 8.52  | 0.11 | 629-92-5    | 12401     | TCMID |
|    |     |        |                   | n-nonanol                                             | 33.19 | 0.01 | 143-08-8    | 8914      | TCMID |
|    |     |        |                   | n-octadecane                                          | 9.81  | 0.09 | 593-45-3    | 11635     | TCMID |
|    |     |        |                   | n-pentadecane                                         | 13.98 | 0.05 | 629-62-9    | 12391     | TCMID |
|    |     |        |                   | nicotine                                              | NA    | NA   | NA          | 6919000   | TCMID |
|    |     |        |                   | nicotinic acid                                        | NA    | NA   | NA          | 644263    | TCMID |
|    |     |        |                   | nicotinic acid                                        | 47.65 | 0.02 | 123574-58-3 | 938       | TCMID |
|    |     |        |                   | nona-2,4-dienal                                       | NA    | NA   | NA          | 23203     | TCMID |
|    |     |        |                   | nonadecanoic acid                                     | 17.21 | 0.17 | 12707-74-3  | 12591     | TCMID |
|    |     |        |                   | nonanoic acid                                         | 53.29 | 0.88 | 128-62-1    | 275196    | TCMID |
|    |     |        |                   | o-(o-methoxyphenoxy)phenol                            | 50.75 | 0.09 | 21905-60-2  | 572803    | TCMID |
|    |     |        |                   | octadecane                                            | NA    | NA   | NA          | 172417    | TCMID |
|    |     |        |                   | octadecanoic acid                                     | NA    | NA   | NA          | 164708    | TCMID |
|    |     |        |                   | octadecanol                                           | NA    | NA   | NA          | 33601     | TCMID |
|    |     |        |                   | octanol                                               | NA    | NA   | NA          | 11527     | TCMID |
|    |     |        |                   | palmitic acid                                         | NA    | NA   | NA          | 18413781  | TCMID |
|    |     |        |                   | pentadecanoic acid                                    | NA    | NA   | NA          | 22169126  | TCMID |
|    |     |        |                   | pentadecanoic acid                                    | NA    | NA   | NA          | 13615306  | TCMID |
|    |     |        |                   | perlolirine                                           | NA    | NA   | NA          | 10706796  | TCMID |
|    |     |        |                   | phenylalanine                                         | 41.62 | 0.04 | 5297-02-9   | 6925665   | TCMID |
|    |     |        |                   | phenylic acid                                         | NA    | NA   | NA          | 996       | TCMID |
|    |     |        |                   | pyridine                                              | NA    | NA   | NA          | 11738823  | TCMID |
|    |     |        |                   | pyroglutamic acidn-fructoside                         | NA    | NA   | NA          | NA        | TCMID |
|    |     |        |                   | rhamnose                                              | 50.5  | 0.04 | 10030-85-0  | 439710    | TCMID |
|    |     |        |                   | ribose                                                | NA    | NA   | NA          | 11959768  | TCMID |
|    |     |        |                   | ricinine                                              | NA    | NA   | NA          | 2786702   | TCMID |
|    |     |        |                   | scutellarein glucoside                                | NA    | NA   | NA          | NA        | TCMID |
|    |     |        |                   | spinoside                                             | NA    | NA   | NA          | 6326071   | TCMID |
|    |     |        |                   | stearic acid                                          | NA    | NA   | NA          | 3033836   | TCMID |
|    |     |        |                   | stigmasta-5                                           | NA    | NA   | NA          | 6432745   | TCMID |
|    |     |        |                   | stigmasta-5,22-dien-3-one                             | NA    | NA   | NA          | 5321507   | TCMID |
|    |     |        |                   | stigmasta-7,22-dien-3-one                             | NA    | NA   | NA          | NA        | TCMID |
|    |     |        |                   | stigmasterol                                          | NA    | NA   | NA          | 50930798  | TCMID |
|    |     |        |                   | stigmasterol-beta-d-glucoside                         | NA    | NA   | NA          | 70699355  | TCMID |
|    |     |        |                   | stigmasterol-beta-d-glucoside                         | NA    | NA   | NA          | NA        | TCMID |
|    |     |        |                   | stigmasteryl ferulate                                 | NA    | NA   | NA          | 10769701  | TCMID |
|    |     |        |                   | syringaldehyde                                        | 67.06 | 0.05 | 134-96-3    | 8655      | TCMID |
|    |     |        |                   | syringin                                              | NA    | NA   | NA          | 24847743  | TCMID |
|    |     |        |                   | tangshenoside                                         | NA    | NA   | NA          | 14135589  | TCMID |
|    |     |        |                   | tangshenoside i                                       | NA    | NA   | NA          | 6441191   | TCMID |
|    |     |        |                   | tangshenoside ii                                      | NA    | NA   | NA          | 5321613   | TCMID |
|    |     |        |                   | tanshenoside                                          | NA    | NA   | NA          | NA        | TCMID |
|    |     |        |                   | taraxerol                                             | NA    | NA   | NA          | 11876269  | TCMID |
|    |     |        |                   | taraxerone                                            | NA    | NA   | NA          | 11877466  | TCMID |
|    |     |        |                   | taraxeryl acetate                                     | 9.59  | 0.74 | 127-22-0    | 94225     | TCMID |
|    |     |        |                   | tartaric acid                                         | NA    | NA   | NA          | 24848123  | TCMID |
|    |     |        |                   | tert-butylbenzene                                     | 53.06 | 0.02 | 98-06-6     | 7366      | TCMID |
|    |     |        |                   | tryptophan                                            | NA    | NA   | NA          | 56844224  | TCMID |
|    |     |        |                   | vanillic acid                                         | NA    | NA   | NA          | 54675858  | TCMID |
|    |     |        |                   | xylose                                                | NA    | NA   | NA          | 11008084  | TCMID |
|    |     |        |                   | alpha-curcumene                                       | 4.68  | 0.06 | 4176-17-4   | 442360    | TCMID |
|    |     |        |                   | alpha-pinene                                          | 44.84 | 0.05 | 18172-67-3  | 440967    | TCMID |
|    |     |        |                   | alpha-spinasterol                                     | 42.98 | 0.76 | 481-18-5    | 5281331   | TCMID |
|    |     |        |                   | alpha-spinasterol-beta-d-glucoside                    | NA    | NA   | NA          | 101932119 | TCMID |
|    |     |        |                   | delta-guaiene                                         | NA    | NA   | NA          | 91753506  | TCMID |
| 24 | 亚麻子 | Yamazi | Semen Lini        | Cycloartenol                                          | 38.69 | 0.78 | 469-38-5    | NA        | TCMSP |
|    |     |        |                   | beta-sitosterol                                       | 36.91 | 0.75 | 83-46-5     | 222284    | TCMSP |
|    |     |        |                   | sitosterol                                            | 36.91 | 0.75 | 83-46-5     | 12303645  | TCMSP |
|    |     |        |                   | Stigmaterol                                           | 43.83 | 0.76 | 83-48-7     | 5280794   | TCMSP |
|    |     |        |                   | Cyclomahanimbine                                      | 37.68 | 0.7  | NA          | NA        | TCMSP |
|    |     |        |                   | Linarin isovalerate                                   | 46.34 | 0.52 | NA          | 5319030   | TCMSP |
|    |     |        |                   | CLR                                                   | 37.87 | 0.68 | 80356-14-5  | 5997      | TCMSP |
|    |     |        |                   | ferulic acid                                          | 39.56 | 0.06 | 1135-24-6   | 445858    | CSDB  |
|    |     |        |                   | 24-methylenecycloartanol                              | NA    | NA   | 118628-12-9 | 94204     | CSDB  |
|    |     |        |                   | isoorientin-7-glucoside                               | NA    | NA   | 1417-17-7   | 44559810  | CSDB  |
|    |     |        |                   | delta-avenasterol                                     | 43.78 | 0.76 | 18472-36-1  | 5281326   | CSDB  |
|    |     |        |                   | geranylgeraniol                                       | 40.45 | 0.14 | 24034-73-9  | 5281365   | CSDB  |
|    |     |        |                   | orientin-7-rhamnoside                                 | NA    | NA   | 29432-29-9  | 74977589  | CSDB  |
|    |     |        |                   | caffeic acid                                          | 25.76 | 0.05 | 331-39-5    | 689043    | CSDB  |
|    |     |        |                   | 9beta,19-cyclolanost-24-enol                          | NA    | NA   | 469-38-5    | 92110     | CSDB  |
|    |     |        |                   | campesterol                                           | 37.58 | 0.71 | 474-62-4    | 173183    | CSDB  |
|    |     |        |                   | linamarin                                             | 17.18 | 0.09 | 554-35-8    | 11128     | CSDB  |
|    |     |        |                   | cholesterol                                           | 37.87 | 0.68 | 57-88-5     | 5997      | CSDB  |
|    |     |        |                   | linoleic acid                                         | 41.9  | 0.14 | 60-33-3     | 5280450   | CSDB  |
|    |     |        |                   | eicosanol                                             | 12.1  | 0.16 | 629-96-9    | 12404     | CSDB  |
|    |     |        |                   | p-coumaric acid                                       | 43.29 | 0.04 | 7400-08-0   | 637542    | CSDB  |
|    |     |        |                   | sitosterol                                            | 36.91 | 0.75 | 83-46-5     | 222284    | CSDB  |
|    |     |        |                   | stigmasterol                                          | 43.83 | 0.76 | 83-48-7     | 5280794   | CSDB  |
|    |     |        |                   | lucenin-7-rhamnoside                                  | NA    | NA   | NA          | NA        | CSDB  |
|    |     |        |                   | cyclolinopeptide f                                    | NA    | NA   | NA          | 6398538   | TCMID |
|    |     |        |                   | cyclolinopeptide g                                    | NA    | NA   | NA          | 10724885  | TCMID |
|    |     |        |                   | cyclolinopeptide h                                    | NA    | NA   | NA          | 10558089  | TCMID |
|    |     |        |                   | cyclolinopeptide i                                    | NA    | NA   | NA          | 9574106   | TCMID |
|    |     |        |                   | cyclolinopeptides g                                   | NA    | NA   | NA          | NA        | TCMID |
|    |     |        |                   | cyclolinopeptides h                                   | NA    | NA   | NA          | NA        | TCMID |
|    |     |        |                   | cyclolinopeptides i                                   | NA    | NA   | NA          | NA        | TCMID |
|    |     |        |                   | cyclomahanimbine                                      | NA    | NA   | NA          | 375144    | TCMID |
|    |     |        |                   | eicosyl ferulate                                      | NA    | NA   | NA          | 6440080   | TCMID |
|    |     |        |                   | eicosyl ferulate                                      | 15.66 | 0.6  | NA          | 5317019   | TCMID |
|    |     |        |                   | elaicid acid                                          | NA    | NA   | NA          | 10755888  | TCMID |
|    |     |        |                   | linamarin                                             | 17.18 | 0.09 | 554-35-8    | 11128     | TCMID |
|    |     |        |                   | linarin isovalerate                                   | 46.34 | 0.52 | NA          | 5319030   | TCMID |
| 25 | 泽泻  | Zexie  | Alismatis Rhizoma | sitosterol                                            | 36.91 | 0.75 | 83-46-5     | 12303645  | TCMSP |
|    |     |        |                   | Alisol B                                              | 34.47 | 0.82 | NA          | NA        | TCMSP |
|    |     |        |                   | Alisol B monoacetate                                  | 35.58 | 0.81 | 26575-95-1  | NA        | TCMSP |
|    |     |        |                   | alisol,b,23-acetate                                   | 32.52 | 0.82 | 26575-95-1  | NA        | TCMSP |
|    |     |        |                   | 16beta-methoxyalisol B monoacetate                    | 32.43 | 0.77 | 115333-90-9 | NA        | TCMSP |
|    |     |        |                   | alisol B                                              | 36.76 | 0.82 | 18649-93-9  | NA        | TCMSP |
|    |     |        |                   | alisol C                                              | 32.7  | 0.82 | 30489-27-1  | NA        | TCMSP |
|    |     |        |                   | alisol C monoacetate                                  | 33.06 | 0.83 | 26575-93-9  | NA        | TCMSP |
|    |     |        |                   | 1-Monolinolein                                        | 37.18 | 0.3  | 107380-08-5 | 6436630   | TCMSP |
|    |     |        |                   | [(1S,3R)-1-[(2R)-3,3-dimethyloxiran-2-yl]-3-[(5R,8S)- | 35.58 | 0.81 | 19865-76-0  | 14036811  | TCMSP |
|    |     |        |                   | 16beta-methoxyalisol B monoacetate                    | NA    | NA   | 115333-90-9 | NA        | CSDB  |
|    |     |        |                   | epialisol A                                           | NA    | NA   | 19865-73-7  | 101297679 | CSDB  |
|    |     |        |                   | alisol A                                              | 49.45 | 0.09 | 87827-55-2  | 15934381  | CSDB  |
|    |     |        |                   | alisol A                                              | 59.68 | 0.1  | 87701-68-6  | 10988340  | CSDB  |
|    |     |        |                   | alisol A                                              | 18.28 | 0.81 | 19885-10-0  | 15558616  | CSDB  |
|    |     |        |                   | alisol A(B,C)monoacetate                              | NA    | NA   | 18674-16-3  | 76336194  | CSDB  |

|    |     |           |                                 |                                                    |       |      |             |           |       |
|----|-----|-----------|---------------------------------|----------------------------------------------------|-------|------|-------------|-----------|-------|
|    |     |           |                                 | choline                                            | 0.47  | 0.01 | 62-49-7     | 305       | CSDB  |
|    |     |           |                                 | 16β-hydroxyalisol B monoacetate                    | NA    | NA   | 115346-25-3 | NA        | CSDB  |
|    |     |           |                                 | alisol B                                           | NA    | NA   | 18649-93-9  | 15558620  | CSDB  |
|    |     |           |                                 | alisol C                                           | NA    | NA   | 30489-27-1  | 101306923 | CSDB  |
|    |     |           |                                 | alisol B monoacetate                               | 35.58 | 0.81 | 26575-95-1  | 14036811  | CSDB  |
|    |     |           |                                 | alisol C monoacetate                               | NA    | NA   | 26575-93-9  | 14036813  | CSDB  |
|    |     |           |                                 | sitosterol-3-O-steroyl-β-D-glucopyranoside         | NA    | NA   | NA          | NA        | CSDB  |
|    |     |           |                                 | 11-deoxyalisol                                     | NA    | NA   | NA          | 10005131  | TCMID |
|    |     |           |                                 | 13β,17β-epoxyalisol                                | NA    | NA   | NA          | 101661273 | TCMID |
|    |     |           |                                 | 13β,17β-epoxyalisol a 24-acetate                   | NA    | NA   | NA          | 5317132   | TCMID |
|    |     |           |                                 | 2-furaldehyde                                      | NA    | NA   | NA          | 25201088  | TCMID |
|    |     |           |                                 | 2-furancarboxylic acid                             | NA    | NA   | NA          | 5460151   | TCMID |
|    |     |           |                                 | 25-anhydroalisol a 11-acetate                      | NA    | NA   | NA          | 5318945   | TCMID |
|    |     |           |                                 | 25-anhydroalisol a 24-acetate                      | NA    | NA   | NA          | 5318952   | TCMID |
|    |     |           |                                 | alisol                                             | NA    | NA   | NA          | 11790742  | TCMID |
|    |     |           |                                 | alisol                                             | NA    | NA   | NA          | 46173912  | TCMID |
|    |     |           |                                 | alisol a 24-acetate                                | NA    | NA   | NA          | 76336194  | TCMID |
|    |     |           |                                 | alisol a monoacetate                               | NA    | NA   | NA          | 76336194  | TCMID |
|    |     |           |                                 | alisol b                                           | NA    | NA   | NA          | 44144281  | TCMID |
|    |     |           |                                 | alisol b monoacetate                               | NA    | NA   | NA          | 46829428  | TCMID |
|    |     |           |                                 | alisol c                                           | NA    | NA   | NA          | 46173914  | TCMID |
|    |     |           |                                 | alisol c monoacetate                               | NA    | NA   | NA          | 14036813  | TCMID |
|    |     |           |                                 | alisol e 23-acetate                                | NA    | NA   | NA          | 5317286   | TCMID |
|    |     |           |                                 | alisol e 24-acetate                                | NA    | NA   | NA          | 24884081  | TCMID |
|    |     |           |                                 | alisol f                                           | NA    | NA   | NA          | 76310822  | TCMID |
|    |     |           |                                 | alizexol                                           | NA    | NA   | NA          | NA        | TCMID |
|    |     |           |                                 | alizexol b                                         | NA    | NA   | NA          | NA        | TCMID |
|    |     |           |                                 | neolisol                                           | NA    | NA   | NA          | 5320048   | TCMID |
|    |     |           |                                 | oriediterpenol                                     | NA    | NA   | NA          | 5320304   | TCMID |
|    |     |           |                                 | oriediterpenoside                                  | NA    | NA   | NA          | 6325764   | TCMID |
|    |     |           |                                 | orientalol                                         | NA    | NA   | NA          | 100942758 | TCMID |
|    |     |           |                                 | orientalol b                                       | NA    | NA   | NA          | 100942914 | TCMID |
|    |     |           |                                 | orientalol c                                       | NA    | NA   | NA          | NA        | TCMID |
|    |     |           |                                 | orientalol e                                       | NA    | NA   | NA          | 10445038  | TCMID |
|    |     |           |                                 | orientalol f                                       | NA    | NA   | NA          | 11020886  | TCMID |
|    |     |           |                                 | sulfoorientalol                                    | NA    | NA   | NA          | 10017818  | TCMID |
|    |     |           |                                 | sulfoorientalol b                                  | NA    | NA   | NA          | 10245341  | TCMID |
|    |     |           |                                 | sulfoorientalol c                                  | NA    | NA   | NA          | 10470100  | TCMID |
|    |     |           |                                 | sulfoorientalol d                                  | NA    | NA   | NA          | 9996020   | TCMID |
|    |     |           |                                 | sulfopatrinoside i                                 | NA    | NA   | NA          | 23706217  | TCMID |
| 26 | 大腹皮 | Dafupi    | <i>Arecae Pericarpium</i>       | Procyanidin B1                                     | 67.87 | 0.66 | 20315-25-7  | 11250133  | TCMSP |
|    |     |           |                                 | ent-Épicatechin                                    | 48.96 | 0.24 | 35323-91-2  | 182232    | TCMSP |
|    |     |           |                                 | (Z)-9,17-octadecadienal                            | 38.26 | 0.12 | 56554-35-9  | 5365667   | TCMID |
|    |     |           |                                 | 1,2,3-Trimethoxy-5-methyl-benzene                  | 23.73 | 0.04 | 6443-69-2   | 80922     | TCMID |
|    |     |           |                                 | 1,2,3-trimethoxy-benzene                           | NA    | NA   | NA          | 578106    | TCMID |
|    |     |           |                                 | 1,2-benzisothiazole                                | 74.17 | 0.03 | 272-16-2    | 9225      | TCMID |
|    |     |           |                                 | 1,2-dimethoxy-benzene                              | 36.82 | 0.02 | 91-16-7     | 7043      | TCMID |
|    |     |           |                                 | 1,4-dimethoxy-benzene                              | NA    | NA   | NA          | 9016      | TCMID |
|    |     |           |                                 | 1-methyl-phenol                                    | NA    | NA   | NA          | NA        | TCMID |
|    |     |           |                                 | 2,3-dihydro-1H-inden-1-one                         | NA    | NA   | NA          | 6735      | TCMID |
|    |     |           |                                 | 2,5-dimethyl-phenol                                | NA    | NA   | NA          | 7267      | TCMID |
|    |     |           |                                 | 2,6-dimethyl lanisole                              | NA    | NA   | NA          | NA        | TCMID |
|    |     |           |                                 | 2,6-dimethyl-naphthalene                           | 19.21 | 0.05 | 581-42-0    | 11387     | TCMID |
|    |     |           |                                 | 2-methoxy-4-methyl-phenol                          | 50.91 | 0.03 | 93-51-6     | 7144      | TCMID |
|    |     |           |                                 | 2-methoxy-naphthalene                              | NA    | NA   | NA          | 7119      | TCMID |
|    |     |           |                                 | 3,4-dimethyl lanisole                              | NA    | NA   | NA          | NA        | TCMID |
|    |     |           |                                 | 3,4-mimethoxytoluene                               | NA    | NA   | NA          | NA        | TCMID |
|    |     |           |                                 | 4-ethyl-2-methoxy-phenol                           | 35.9  | 0.03 | 2785-89-9   | 62465     | TCMID |
|    |     |           |                                 | 4-ethyl-2-methyl-phenol                            | NA    | NA   | NA          | NA        | TCMID |
|    |     |           |                                 | 5-methoxy-benzofuran                               | NA    | NA   | NA          | NA        | TCMID |
|    |     |           |                                 | 7-methoxy-benzofuran                               | NA    | NA   | NA          | NA        | TCMID |
|    |     |           |                                 | acetic acid                                        | NA    | NA   | NA          | 29927927  | TCMID |
|    |     |           |                                 | arecaidine                                         | NA    | NA   | NA          | 10355     | TCMID |
|    |     |           |                                 | arecoline                                          | NA    | NA   | NA          | 9301      | TCMID |
|    |     |           |                                 | bexamethyl-benzene                                 | NA    | NA   | NA          | NA        | TCMID |
|    |     |           |                                 | biphenyl                                           | NA    | NA   | NA          | 2734215   | TCMID |
|    |     |           |                                 | buthlated hydroxytoluene                           | 40.02 | 0.07 | 50356-19-9  | 31404     | TCMID |
|    |     |           |                                 | dibenzofuran                                       | NA    | NA   | NA          | 22185316  | TCMID |
|    |     |           |                                 | guvacine                                           | NA    | NA   | NA          | 11957555  | TCMID |
|    |     |           |                                 | guvacoline                                         | 32.67 | 0.02 | 495-19-2    | 160492    | TCMID |
|    |     |           |                                 | hexadecane                                         | NA    | NA   | NA          | 172416    | TCMID |
|    |     |           |                                 | n-hexadecanoic                                     | NA    | NA   | NA          | 504166    | TCMID |
|    |     |           |                                 | naphthalene                                        | NA    | NA   | NA          | 177751    | TCMID |
|    |     |           |                                 | phenanthrene                                       | NA    | NA   | NA          | 11346449  | TCMID |
|    |     |           |                                 | tetradecane                                        | 6.15  | 0.04 | 68855-58-3  | 14260     | TCMID |
|    |     |           |                                 | tetradecanoic acid                                 | NA    | NA   | NA          | 53435003  | TCMID |
| 27 | 红粉  | Hongfen   | <i>Hydrargyri Oxydum Rubrum</i> | HgO                                                | NA    | NA   | NA          | 2805480   | TCMID |
| 28 | 车前子 | Cheqianzi | <i>Plantaginis semen</i>        | (4aS,6aR,6aS,6bR,8aR,10R,12aR,14bS)-10-hydroxy     | 32.03 | 0.76 | 508-02-1    | 11869658  | TCMSP |
|    |     |           |                                 | Dinatin                                            | 30.97 | 0.27 | 1447-88-7   | 5281628   | TCMSP |
|    |     |           |                                 | sitosterol                                         | 36.91 | 0.75 | 83-46-5     | 12303645  | TCMSP |
|    |     |           |                                 | daucostero qt                                      | 36.91 | 0.75 | 474-58-8    | NA        | TCMSP |
|    |     |           |                                 | Dihydrotricetin                                    | 58.12 | 0.28 | 78708-33-5  | 440836    | TCMSP |
|    |     |           |                                 | Hypolaetin                                         | 33.24 | 0.28 | 27696-41-9  | 5281648   | TCMSP |
|    |     |           |                                 | orobanchoside qt                                   | 55.99 | 0.82 | 61276-16-2  | NA        | TCMSP |
|    |     |           |                                 | plantagin qt                                       | 54.04 | 0.24 | 26046-94-6  | NA        | TCMSP |
|    |     |           |                                 | quercetin                                          | 46.43 | 0.28 | 73123-10-1  | 5280343   | TCMSP |
|    |     |           |                                 | baicalein                                          | NA    | NA   | NA          | 9816931   | TCMID |
|    |     |           |                                 | plantenolic acid                                   | NA    | NA   | NA          | NA        | TCMID |
| 29 | 香附  | Xiangfu   | <i>Cyperi Rhizoma</i>           | Chryseriol                                         | 35.85 | 0.27 | 491-71-4    | 5280666   | TCMSP |
|    |     |           |                                 | isorhamnetin                                       | 49.6  | 0.31 | 480-19-3    | 5281654   | TCMSP |
|    |     |           |                                 | 8-Isopentenyl-kaempferol                           | 38.04 | 0.39 | 28610-31-3  | 5318624   | TCMSP |
|    |     |           |                                 | beta-sitosterol                                    | 36.91 | 0.75 | 83-46-5     | 222284    | TCMSP |
|    |     |           |                                 | sitosterol                                         | 36.91 | 0.75 | 83-46-5     | 12303645  | TCMSP |
|    |     |           |                                 | 1,4-Epoxy-16-hydroxyheneicos-1,3,12,14,18-pentaene | 45.1  | 0.24 | NA          | NA        | TCMSP |
|    |     |           |                                 | Isodalbergin                                       | 35.45 | 0.2  | NA          | 5318543   | TCMSP |
|    |     |           |                                 | Khell                                              | 33.19 | 0.19 | 82-02-0     | 3828      | TCMSP |
|    |     |           |                                 | khellol glucoside                                  | 74.96 | 0.72 | NA          | 70697662  | TCMSP |
|    |     |           |                                 | Resivit                                            | 30.84 | 0.27 | 480-17-1    | 440833    | TCMSP |
|    |     |           |                                 | rosenonolactone                                    | 79.84 | 0.37 | 508-71-4    | NA        | TCMSP |
|    |     |           |                                 | Hyndarin                                           | 73.94 | 0.64 | 84-38-8     | 72301     | TCMSP |
|    |     |           |                                 | stigmaterol glucoside qt                           | 43.83 | 0.76 | 19716-26-8  | NA        | TCMSP |
|    |     |           |                                 | sugeonyl acetate                                   | 45.08 | 0.2  | NA          | NA        | TCMSP |
|    |     |           |                                 | kaempferol                                         | 41.88 | 0.24 | 520-18-3    | 5280863   | TCMSP |
|    |     |           |                                 | Stigmaterol                                        | 43.83 | 0.76 | 83-48-7     | 5280794   | TCMSP |
|    |     |           |                                 | luteolin                                           | 36.16 | 0.25 | 491-70-3    | 5280445   | TCMSP |
|    |     |           |                                 | quercetin                                          | 46.43 | 0.28 | 73123-10-1  | 5280343   | TCMSP |
|    |     |           |                                 | rhamnetin-3-O-rhamnosyl(1→4)-rhamnopyranoside      | NA    | NA   | 105755-71-3 | NA        | CSDB  |
|    |     |           |                                 | β-pinene                                           | NA    | NA   | 127-91-3    | 14896     | CSDB  |
|    |     |           |                                 | cyperolone                                         | 42.59 | 0.11 | 13741-46-3  | 5316283   | CSDB  |
|    |     |           |                                 | sugetriol                                          | NA    | NA   | 18067-36-2  | 46173922  | CSDB  |
|    |     |           |                                 | rotundone                                          | NA    | NA   | 18374-76-0  | 5321003   | CSDB  |
|    |     |           |                                 | cyperol                                            | 27.61 | 0.1  | 20084-99-5  | 14076601  | CSDB  |
|    |     |           |                                 | isocyperol                                         | 22.08 | 0.1  | 20085-00-1  | 14076604  | CSDB  |
|    |     |           |                                 | calamenene                                         | 17.47 | 0.08 | 22339-23-7  | 11298625  | CSDB  |
|    |     |           |                                 | β-cyperone                                         | NA    | NA   | 23665-63-6  | 10889388  | CSDB  |
|    |     |           |                                 | cyperene                                           | NA    | NA   | 2387-78-2   | 12308843  | CSDB  |
|    |     |           |                                 | kobusone                                           | NA    | NA   | 24173-71-5  | 6710676   | CSDB  |

|    |    |      |                          |                                                             |       |      |             |          |       |
|----|----|------|--------------------------|-------------------------------------------------------------|-------|------|-------------|----------|-------|
|    |    |      |                          | isokobusone                                                 | 39.63 | 0.11 | 24173-72-6  | 1493936  | CSDB  |
|    |    |      |                          | copadiene                                                   | NA    | NA   | 27597-38-2  | 5316058  | CSDB  |
|    |    |      |                          | cyperotundone                                               | NA    | NA   | 3466-15-7   | 12308615 | CSDB  |
|    |    |      |                          | $\alpha$ -copaene                                           | NA    | NA   | 3856-25-5   | 76319594 | CSDB  |
|    |    |      |                          | cineole                                                     | 39.73 | 0.05 | 470-82-6    | 2758     | CSDB  |
|    |    |      |                          | fructose                                                    | 1.68  | 0.03 | 57-48-7     | 5984     | CSDB  |
|    |    |      |                          | patchoulone                                                 | NA    | NA   | 5986-54-9   | 10998497 | CSDB  |
|    |    |      |                          | $\alpha$ -humulene                                          | 22.98 | 0.06 | 6753-98-6   | 5281520  | CSDB  |
|    |    |      |                          | selinatriene                                                | NA    | NA   | 74634-83-6  | NA       | CSDB  |
|    |    |      |                          | limonene                                                    | NA    | NA   | 7705-14-8   | 22311    | CSDB  |
|    |    |      |                          | camphene                                                    | NA    | NA   | 79-92-5     | 6616     | CSDB  |
|    |    |      |                          | $\beta$ -caryophyllene                                      | 29.7  | 0.09 | 87-44-5     | 5281515  | CSDB  |
|    |    |      |                          | p-cymol                                                     | 27.2  | 0.02 | 99-87-6     | 7463     | CSDB  |
|    |    |      |                          | caryophellene                                               | NA    | NA   | NA          | NA       | CSDB  |
|    |    |      |                          | patchoulenyl acetate                                        | NA    | NA   | NA          | NA       | CSDB  |
|    |    |      |                          | 4 $\alpha$ ,5 $\alpha$ -oxidoeudesm-11-en-3 $\alpha$ -ol    | NA    | NA   | NA          | NA       | CSDB  |
|    |    |      |                          | sugeonyl acetate                                            | NA    | NA   | NA          | 46173924 | CSDB  |
|    |    |      |                          | $\alpha$ -cyperone                                          | NA    | NA   | NA          | 273568   | CSDB  |
|    |    |      |                          | D-glucose                                                   | NA    | NA   | NA          | 5793     | CSDB  |
|    |    |      |                          | epoxyguaine                                                 | NA    | NA   | NA          | 5317144  | CSDB  |
|    |    |      |                          | epoxy guaine                                                | NA    | NA   | NA          | NA       | CSDB  |
|    |    |      |                          | $\alpha$ ( $\beta$ )-rotunol                                | NA    | NA   | NA          | NA       | CSDB  |
|    |    |      |                          | (+)-cyperadione                                             | NA    | NA   | NA          | 85806500 | TCMID |
|    |    |      |                          | (?)-cypera-2,4(15)-diene                                    | NA    | NA   | NA          | 91710045 | TCMID |
|    |    |      |                          | (?)-isorotundene                                            | NA    | NA   | NA          | 42608204 | TCMID |
|    |    |      |                          | (?)-norrotundene                                            | NA    | NA   | NA          | 91700424 | TCMID |
|    |    |      |                          | 10,12-peroxycalamenene                                      | NA    | NA   | NA          | 10399059 | TCMID |
|    |    |      |                          | 4,7-dimethyl-1-tetralone                                    | 34.41 | 0.06 | NA          | 71608071 | TCMID |
|    |    |      |                          | 4 $\alpha$ ,5 $\alpha$ -oxidoeudesm-11-en-3 $\alpha$ -ol    | NA    | NA   | NA          | NA       | TCMID |
|    |    |      |                          | alpha-cyperone                                              | NA    | NA   | NA          | 46173865 | TCMID |
|    |    |      |                          | beta-cyperone                                               | NA    | NA   | NA          | 10889388 | TCMID |
|    |    |      |                          | beta-selinene                                               | 24.39 | 0.08 | 17066-67-0  | 442393   | TCMID |
|    |    |      |                          | copadiene                                                   | NA    | NA   | NA          | 5316058  | TCMID |
|    |    |      |                          | cyperene                                                    | NA    | NA   | NA          | 12308843 | TCMID |
|    |    |      |                          | cyperol                                                     | 27.61 | 0.1  | NA          | 14076601 | TCMID |
|    |    |      |                          | cyperolone                                                  | 42.59 | 0.11 | 13741-46-3  | 5316283  | TCMID |
|    |    |      |                          | epoxyguaine                                                 | NA    | NA   | NA          | 5317144  | TCMID |
|    |    |      |                          | isocyperol                                                  | NA    | NA   | NA          | 44576209 | TCMID |
|    |    |      |                          | isokobusone                                                 | NA    | NA   | NA          | 7067857  | TCMID |
|    |    |      |                          | kobusone                                                    | NA    | NA   | NA          | 14543515 | TCMID |
|    |    |      |                          | patchoulone                                                 | NA    | NA   | NA          | 11820688 | TCMID |
|    |    |      |                          | patchoulenyl acetate                                        | NA    | NA   | NA          | NA       | TCMID |
|    |    |      |                          | rhamnetin-3-o-rhamnosyl(1 $\rightarrow$ 4)-rhamnopyranoside | NA    | NA   | NA          | NA       | TCMID |
|    |    |      |                          | rotundone                                                   | NA    | NA   | NA          | 5321003  | TCMID |
|    |    |      |                          | sugetriol                                                   | NA    | NA   | NA          | 46173922 | TCMID |
|    |    |      |                          | $\alpha$ -cyperone                                          | 35.37 | 0.1  | 473-08-5    | 10632629 | TCMID |
|    |    |      |                          | $\alpha$ -rotunol                                           | 53.42 | 0.12 | NA          | 11651583 | TCMID |
|    |    |      |                          | $\beta$ -cyperone                                           | NA    | NA   | NA          | 10889388 | TCMID |
|    |    |      |                          | $\beta$ -rotunol                                            | 59.69 | 0.12 | NA          | 5321005  | TCMID |
| 30 | 荷叶 | Heve | <i>Nelumbinis Folium</i> | quercetin                                                   | 46.43 | 0.28 | 73123-10-1  | 5280343  | TCMSP |
|    |    |      |                          | isorhamnetin                                                | 49.6  | 0.31 | 480-19-3    | 5281654  | TCMSP |
|    |    |      |                          | sitosterol                                                  | 36.91 | 0.75 | 83-46-5     | 12303645 | TCMSP |
|    |    |      |                          | kaempferol                                                  | 41.88 | 0.24 | 520-18-3    | 5280863  | TCMSP |
|    |    |      |                          | (1S)-1-(4-hydroxybenzyl)-2-methyl-3,4-dihydro-1H-is         | 67.14 | 0.23 | 66277-20-1  | 11426154 | TCMSP |
|    |    |      |                          | Cycloartenol                                                | 38.69 | 0.78 | 469-38-5    | NA       | TCMSP |
|    |    |      |                          | Armpavine                                                   | 69.31 | 0.29 | 524-20-9    | 442169   | TCMSP |
|    |    |      |                          | Machiline                                                   | 79.64 | 0.24 | 2196-60-3   | 440989   | TCMSP |
|    |    |      |                          | o-Nornuciferine                                             | 33.52 | 0.36 | 3153-55-7   | 197017   | TCMSP |
|    |    |      |                          | Nuciferin                                                   | 34.43 | 0.4  | 475-83-2    | 10146    | TCMSP |
|    |    |      |                          | (+)-Leucocyanidin                                           | 37.61 | 0.27 | 69256-15-1  | 155206   | TCMSP |
|    |    |      |                          | leucodelphinidin                                            | 30.02 | 0.31 | 491-52-1    | 44563331 | TCMSP |
|    |    |      |                          | Remerin                                                     | 40.75 | 0.52 | 548-08-3    | NA       | TCMSP |
|    |    |      |                          | ent-Epicatechin                                             | 48.96 | 0.24 | 35323-91-2  | 182232   | TCMSP |
|    |    |      |                          | (-)-catechin                                                | 49.68 | 0.24 | 154-23-4    | 73160    | TCMSP |
|    |    |      |                          | quercetin                                                   | 46.43 | 0.28 | 117-39-5    | 5280343  | CSDB  |
|    |    |      |                          | querceton                                                   | 46.43 | 0.28 | 117-39-5    | 5280343  | CSDB  |
|    |    |      |                          | gluconic acid                                               | 15.15 | 0.04 | 133-42-6    | 10690    | CSDB  |
|    |    |      |                          | sanjoinine E                                                | 34.43 | 0.4  | 2222-86-2   | 10146    | CSDB  |
|    |    |      |                          | 10-nonacosanol                                              | 11.33 | 0.45 | 2606-50-0   | 16057860 | CSDB  |
|    |    |      |                          | methylhesperidin                                            | NA    | NA   | 28034-80-2  | 5284419  | CSDB  |
|    |    |      |                          | N-methylasimilobine                                         | 33.52 | 0.36 | 3153-55-7   | 197017   | CSDB  |
|    |    |      |                          | dehydroroemerine                                            | NA    | NA   | 36285-03-7  | 161899   | CSDB  |
|    |    |      |                          | dehydroanonaine                                             | NA    | NA   | 41679-82-7  | 85821358 | CSDB  |
|    |    |      |                          | liriodenine                                                 | NA    | NA   | 475-75-2    | 10144    | CSDB  |
|    |    |      |                          | leucocyanidin                                               | NA    | NA   | 480-17-1    | 71629    | CSDB  |
|    |    |      |                          | isoquercitrin                                               | 1.86  | 0.77 | 482-35-9    | 5280804  | CSDB  |
|    |    |      |                          | quercetin-3-O-glucoside                                     | 1.86  | 0.77 | 482-35-9    | 5280804  | CSDB  |
|    |    |      |                          | leucodelphinidin                                            | NA    | NA   | 491-52-1    | 3081374  | CSDB  |
|    |    |      |                          | N-methylisococlaurine                                       | NA    | NA   | 66277-20-1  | 21817819 | CSDB  |
|    |    |      |                          | dehydroisococlaurine                                        | NA    | NA   | 7630-74-2   | 821347   | CSDB  |
|    |    |      |                          | $\beta$ -sitosterol                                         | 36.91 | 0.75 | 83-46-5     | 222284   | CSDB  |
|    |    |      |                          | nelumboside                                                 | NA    | NA   | 93252-57-4  | NA       | CSDB  |
|    |    |      |                          | asimilobine                                                 | 25.34 | 0.33 | NA          | 160875   | CSDB  |
|    |    |      |                          | N-norarmepavine                                             | NA    | NA   | NA          | NA       | CSDB  |
|    |    |      |                          | N-nornuciferine                                             | 22.53 | 0.36 | NA          | 12313579 | CSDB  |
|    |    |      |                          | lirinidine                                                  | NA    | NA   | NA          | 31069    | CSDB  |
|    |    |      |                          | armepavine                                                  | 69.31 | 0.29 | NA          | 442169   | CSDB  |
|    |    |      |                          | pronuciferine                                               | NA    | NA   | NA          | 200480   | CSDB  |
|    |    |      |                          | nuciferine                                                  | 34.43 | 0.4  | 2222-86-2   | 10146    | CSDB  |
|    |    |      |                          | roemerine                                                   | NA    | NA   | NA          | 119204   | CSDB  |
|    |    |      |                          | anonaine                                                    | NA    | NA   | NA          | 160597   | CSDB  |
|    |    |      |                          | 1-o-beta-d-glucopytanosylamplexine                          | NA    | NA   | NA          | NA       | TCMID |
|    |    |      |                          | 10-nonacosanol                                              | 11.33 | 0.43 | 504-55-2    | 342803   | TCMID |
|    |    |      |                          | 6-methylcodeine                                             | NA    | NA   | NA          | NA       | TCMID |
|    |    |      |                          | anonaine                                                    | NA    | NA   | NA          | 3462225  | TCMID |
|    |    |      |                          | armepavine                                                  | NA    | NA   | NA          | 680292   | TCMID |
|    |    |      |                          | d-n-methyl coclaurine                                       | 3.35  | 0.26 | 5096-70-8   | 440595   | TCMID |
|    |    |      |                          | gluconic acid                                               | 15.15 | 0.04 | 723724-74-1 | 10690    | TCMID |
|    |    |      |                          | higenamine                                                  | 82.54 | 0.21 | 106032-53-5 | 440988   | TCMID |
|    |    |      |                          | hyperin                                                     | NA    | NA   | NA          | 54758589 | TCMID |
|    |    |      |                          | isoliensinine                                               | NA    | NA   | NA          | 10100278 | TCMID |
|    |    |      |                          | isoquercitrin                                               | NA    | NA   | NA          | 57339948 | TCMID |
|    |    |      |                          | liensinine                                                  | NA    | NA   | NA          | 11621414 | TCMID |
|    |    |      |                          | lirinidine                                                  | NA    | NA   | NA          | 821343   | TCMID |
|    |    |      |                          | liriodenine                                                 | NA    | NA   | NA          | 10144    | TCMID |
|    |    |      |                          | methylazoxymethanol                                         | NA    | NA   | NA          | 6433205  | TCMID |
|    |    |      |                          | n-methylasimilobine                                         | NA    | NA   | NA          | 5319512  | TCMID |
|    |    |      |                          | n-norarmepavine                                             | NA    | NA   | NA          | 317405   | TCMID |
|    |    |      |                          | n-nornuciferine                                             | 22.53 | 0.36 | 4846-19-9   | 12313579 | TCMID |
|    |    |      |                          | neferine                                                    | NA    | NA   | NA          | 398793   | TCMID |
|    |    |      |                          | nelumboside                                                 | 4.46  | 0.62 | NA          | 11968794 | TCMID |
|    |    |      |                          | nematocypol acetate iv                                      | NA    | NA   | NA          | 5320044  | TCMID |
|    |    |      |                          | norobtusifolin                                              | NA    | NA   | NA          | 442759   | TCMID |
|    |    |      |                          | nuciferine                                                  | NA    | NA   | NA          | 3380329  | TCMID |
|    |    |      |                          | nudicauline                                                 | NA    | NA   | NA          | 44363340 | TCMID |
|    |    |      |                          | pronuciferine                                               | NA    | NA   | NA          | 793841   | TCMID |
|    |    |      |                          | propanethial s-oxide                                        | 60.53 | 0    | 32157-29-2  | 441491   | TCMID |

|    |      |                |                                       |                                                        |       |      |            |           |       |
|----|------|----------------|---------------------------------------|--------------------------------------------------------|-------|------|------------|-----------|-------|
|    |      |                |                                       | roemerine                                              | NA    | NA   | NA         | 5274588   | TCMID |
|    |      |                |                                       | rolliniastatin 1                                       | NA    | NA   | NA         | 5352043   | TCMID |
| 31 | 制天南星 | Zhitiannanxing | <i>Arisaematis Rhizoma Preparatum</i> | NA                                                     | NA    | NA   | NA         |           |       |
| 32 | 明党参  | Mingdangshen   | <i>Changii Radix</i>                  | dodecyl acetate                                        | 16.1  | 0.07 | 112-66-3   | 8205      | CSDB  |
|    |      |                |                                       | caprylic acid                                          | 16.4  | 0.02 | 124-07-2   | 379       | CSDB  |
|    |      |                |                                       | $\beta$ -pinene                                        | NA    | NA   | 127-91-3   | 14896     | CSDB  |
|    |      |                |                                       | arabinose                                              | NA    | NA   | 147-81-9   | 854       | CSDB  |
|    |      |                |                                       | 15-methylhexadecanoic acid                             | NA    | NA   | 1603-03-8  | 164860    | CSDB  |
|    |      |                |                                       | 9,11-octadecadienoic acid                              | 41.7  | 0.14 | 1839-11-8  | 5282796   | CSDB  |
|    |      |                |                                       | hexadecenoic acid                                      | 34.02 | 0.1  | 25976-13-0 | 5282743   | CSDB  |
|    |      |                |                                       | 2-methylhexadecanoic acid                              | NA    | NA   | 27147-71-3 | 117384    | CSDB  |
|    |      |                |                                       | 10-octadecenoic acid                                   | 33.13 | 0.14 | 3386-63-8  | 5282760   | CSDB  |
|    |      |                |                                       | D-mannose                                              | 1.76  | 0.03 | 3458-28-4  | 161658    | CSDB  |
|    |      |                |                                       | 1,7,7-trimethyl-bicyclo[2.2.1]hept-2-ene               | NA    | NA   | 464-17-5   | 10047     | CSDB  |
|    |      |                |                                       | $\gamma$ -aminobutyric acid                            | NA    | NA   | 56-12-2    | 119       | CSDB  |
|    |      |                |                                       | alanine                                                | NA    | NA   | 56-41-7    | 5950      | CSDB  |
|    |      |                |                                       | lysine                                                 | 29.33 | 0.02 | 56-87-1    | 5962      | CSDB  |
|    |      |                |                                       | xylose                                                 | 51.08 | 0.02 | 58-86-6    | 644160    | CSDB  |
|    |      |                |                                       | galactose                                              | NA    | NA   | 59-23-4    | 6036      | CSDB  |
|    |      |                |                                       | methionine                                             | NA    | NA   | 59-51-8    | 876       | CSDB  |
|    |      |                |                                       | linoleic acid                                          | 41.9  | 0.14 | 60-33-3    | 5280450   | CSDB  |
|    |      |                |                                       | leucine                                                | NA    | NA   | 61-90-5    | 6106      | CSDB  |
|    |      |                |                                       | tetradecyl acetate                                     | 18.82 | 0.1  | 638-59-5   | 12531     | CSDB  |
|    |      |                |                                       | serine                                                 | NA    | NA   | 6898-95-9  | 617       | CSDB  |
|    |      |                |                                       | aspartate                                              | NA    | NA   | 6899-03-2  | 5960      | CSDB  |
|    |      |                |                                       | glutamic acid                                          | NA    | NA   | 6899-05-4  | 611       | CSDB  |
|    |      |                |                                       | isoleucine                                             | NA    | NA   | 7004-09-3  | 791       | CSDB  |
|    |      |                |                                       | ornithine                                              | NA    | NA   | 70-26-8    | 6262      | CSDB  |
|    |      |                |                                       | nerolidol                                              | NA    | NA   | 7212-44-4  | 5284507   | CSDB  |
|    |      |                |                                       | valine                                                 | NA    | NA   | 72-18-4    | 6287      | CSDB  |
|    |      |                |                                       | threonine                                              | NA    | NA   | 72-19-5    | 6288      | CSDB  |
|    |      |                |                                       | arginine                                               | NA    | NA   | 74-79-3    | 6322      | CSDB  |
|    |      |                |                                       | lecithin                                               | NA    | NA   | 8002-43-5  | 5287971   | CSDB  |
|    |      |                |                                       | decahydro-1,6-methylene-4-(1-methylethyl)naphthalen    | NA    | NA   | NA         | NA        | CSDB  |
|    |      |                |                                       | 1,2,4a,5,6,8a-hexahydro-4,7-dimethyl-1-(1-methylethyl) | NA    | NA   | NA         | NA        | CSDB  |
|    |      |                |                                       | nerol propionate                                       | NA    | NA   | NA         | NA        | CSDB  |
|    |      |                |                                       | D-glucose                                              | NA    | NA   | NA         | 5793      | CSDB  |
|    |      |                |                                       | rhamnose                                               | NA    | NA   | NA         | 25310     | CSDB  |
|    |      |                |                                       | phosphatidic acid                                      | NA    | NA   | NA         | NA        | CSDB  |
|    |      |                |                                       | methyl-6,9-octadecadiynoate                            | NA    | NA   | NA         | 560938    | CSDB  |
|    |      |                |                                       | 2,3,4,5,6,7-hexahydro-1H-inden-2-ol                    | NA    | NA   | NA         | 12592573  | CSDB  |
|    |      |                |                                       | 5-benzocycloctenol                                     | NA    | NA   | NA         | NA        | CSDB  |
|    |      |                |                                       | 6-phenylnonanoic acid                                  | NA    | NA   | NA         | NA        | CSDB  |
|    |      |                |                                       | 2-hydroxy-1-hydroxymethyl-9,12-octadecadienoic acid    | NA    | NA   | NA         | NA        | CSDB  |
|    |      |                |                                       | 5-hydroxy-8-methoxy-psoralen                           | NA    | NA   | NA         | NA        | TCMID |
|    |      |                |                                       | 8-O- $\beta$ -D-glucopyranosyl-5-methoxypsoralen       | NA    | NA   | NA         | NA        | TCMID |
|    |      |                |                                       | 9-vaccenic acid                                        | NA    | NA   | NA         | NA        | TCMID |
|    |      |                |                                       | allopiperitorin                                        | 36.31 | 0.22 | 642-05-7   | 69502     | TCMID |
|    |      |                |                                       | Arabinose                                              | 1.87  | 0.02 | 147-81-9   | 66308     | TCMID |
|    |      |                |                                       | arginine                                               | NA    | NA   | NA         | 6995104   | TCMID |
|    |      |                |                                       | aspartic acid                                          | NA    | NA   | NA         | 6540254   | TCMID |
|    |      |                |                                       | aurantiamide acetate                                   | NA    | NA   | NA         | 5321123   | TCMID |
|    |      |                |                                       | bergapten                                              | 42.21 | 0.13 | 484-20-8   | 2355      | TCMID |
|    |      |                |                                       | caffeic acid                                           | NA    | NA   | NA         | 54710367  | TCMID |
|    |      |                |                                       | choline                                                | 0.47  | 0.01 | 62-49-7    | 305       | TCMID |
|    |      |                |                                       | d-catechin                                             | 54.83 | 0.24 | 154-23-4   | 9064      | TCMID |
|    |      |                |                                       | daucosterol                                            | NA    | NA   | NA         | 52940117  | TCMID |
|    |      |                |                                       | ellagic acid                                           | NA    | NA   | NA         | 16760409  | TCMID |
|    |      |                |                                       | Galactose                                              | NA    | NA   | NA         | 6036      | TCMID |
|    |      |                |                                       | gallic acid                                            | NA    | NA   | NA         | 54675821  | TCMID |
|    |      |                |                                       | geranyl acetate                                        | NA    | NA   | NA         | 24832062  | TCMID |
|    |      |                |                                       | glucose                                                | NA    | NA   | NA         | 5282499   | TCMID |
|    |      |                |                                       | Glycerol alpha-Monopalmitate                           | NA    | NA   | NA         | 14900     | TCMID |
|    |      |                |                                       | heptacosanol                                           | 10.82 | 0.38 | 2004-39-9  | 74822     | TCMID |
|    |      |                |                                       | hexadecylenic acid                                     | NA    | NA   | NA         | NA        | TCMID |
|    |      |                |                                       | imperatorin                                            | 34.55 | 0.22 | 482-44-0   | 10212     | TCMID |
|    |      |                |                                       | imperatorin                                            | 34.55 | 0.22 | 482-44-0   | 10212     | TCMID |
|    |      |                |                                       | isoimperatorin                                         | 45.46 | 0.23 | 482-45-1   | 68081     | TCMID |
|    |      |                |                                       | isolinoic acid                                         | NA    | NA   | NA         | NA        | TCMID |
|    |      |                |                                       | isooleic acid                                          | 33.13 | 0.14 | 3386-63-8  | 5282760   | TCMID |
|    |      |                |                                       | isopimpinellin                                         | 25.93 | 0.17 | 482-27-9   | 68079     | TCMID |
|    |      |                |                                       | mannose                                                | NA    | NA   | NA         | 24749     | TCMID |
|    |      |                |                                       | neryl propionate                                       | 36.64 | 0.05 | 105-91-9   | 5365982   | TCMID |
|    |      |                |                                       | nonacosane                                             | 8.12  | 0.39 | 630-03-5   | 12409     | TCMID |
|    |      |                |                                       | ornithine                                              | NA    | NA   | NA         | 16755646  | TCMID |
|    |      |                |                                       | p-methoxy cinnamic acid                                | NA    | NA   | NA         | 5882350   | TCMID |
|    |      |                |                                       | palmitic acid                                          | NA    | NA   | NA         | 18413781  | TCMID |
|    |      |                |                                       | pentacosanoic acid                                     | 14.57 | 0.37 | 506-38-7   | 10468     | TCMID |
|    |      |                |                                       | phellopterin                                           | 40.19 | 0.28 | 2543-94-4  | 98608     | TCMID |
|    |      |                |                                       | phospholipid                                           | NA    | NA   | NA         | 44319037  | TCMID |
|    |      |                |                                       | psoralen                                               | 33.06 | 0.1  | 66-97-7    | 6199      | TCMID |
|    |      |                |                                       | rhamnose                                               | 50.5  | 0.04 | 10030-85-0 | 439710    | TCMID |
|    |      |                |                                       | rosin                                                  | NA    | NA   | NA         | 5280656   | TCMID |
|    |      |                |                                       | stigmaterol                                            | NA    | NA   | NA         | 50930798  | TCMID |
|    |      |                |                                       | stigmaterol                                            | NA    | NA   | NA         | 50930798  | TCMID |
|    |      |                |                                       | succinic acid                                          | NA    | NA   | NA         | 53338995  | TCMID |
|    |      |                |                                       | succinic acid                                          | NA    | NA   | NA         | 53338995  | TCMID |
|    |      |                |                                       | succinic acid                                          | NA    | NA   | NA         | 612736    | TCMID |
|    |      |                |                                       | tetracosanoic acid                                     | NA    | NA   | NA         | 5461021   | TCMID |
|    |      |                |                                       | tricosanoic acid                                       | NA    | NA   | NA         | 17976333  | TCMID |
|    |      |                |                                       | vaginatrin                                             | NA    | NA   | NA         | 101289771 | TCMID |
|    |      |                |                                       | vanillic acid                                          | NA    | NA   | NA         | 54675858  | TCMID |
|    |      |                |                                       | vanillic acid-4-O- $\beta$ -D-glucoside                | 35.47 | 0.04 | 121-34-6   | 8468      | TCMID |
|    |      |                |                                       | xanthotoxol                                            | NA    | NA   | NA         | 29920867  | TCMID |
|    |      |                |                                       | xanthotoxol                                            | NA    | NA   | NA         | 29920867  | TCMID |
|    |      |                |                                       | xylose                                                 | NA    | NA   | NA         | 11008084  | TCMID |
|    |      |                |                                       | $\beta$ -farnesene                                     | 17.42 | 0.05 | 18452-58-9 | 5281517   | TCMID |
|    |      |                |                                       | $\beta$ -sitosterol                                    | 36.91 | 0.75 | 83-46-5    | 222284    | TCMID |
|    |      |                |                                       | $\beta$ -sitosterol                                    | 36.91 | 0.75 | 83-46-5    | 222284    | TCMID |
|    |      |                |                                       | $\gamma$ -aminobutyric acid                            | NA    | NA   | NA         | 119       | TCMID |
|    |      |                |                                       | $\gamma$ -aminobutyric acid                            | NA    | NA   | NA         | 119       | TCMID |
|    |      |                |                                       | 2,3-dihydro-3,3,6-trimethyl-1H-indene-1-ol             | NA    | NA   | NA         | NA        | TCMID |
|    |      |                |                                       | 2-methyl-palmitic acid                                 | 18.09 | 0.12 | 112-39-0   | 8181      | TCMID |
|    |      |                |                                       | 5-hydroxyl-8-methoxy-psoralenoside                     | NA    | NA   | NA         | NA        | TCMID |
|    |      |                |                                       | 5-hydroxyl-8-methoxy-psoralen                          | NA    | NA   | NA         | NA        | TCMID |
|    |      |                |                                       | 6,9-Octadecadienoic acid methyl ester                  | NA    | NA   | NA         | NA        | TCMID |
|    |      |                |                                       | 6-phenylnonanoic acid                                  | NA    | NA   | NA         | 19609332  | TCMID |
|    |      |                |                                       | 9,11-octadecadienoic acid                              | NA    | NA   | NA         | NA        | TCMID |
|    |      |                |                                       | L-asparagine                                           | NA    | NA   | NA         | NA        | TCMID |
|    |      |                |                                       | L-pyroglutamic acid                                    | NA    | NA   | NA         | NA        | TCMID |
| 33 | 硫磺   | Liuhuang       | <i>Sulfur</i>                         | As                                                     | NA    | NA   | NA         | 49773122  | TCMID |
|    |      |                |                                       | Se                                                     | NA    | NA   | NA         | 6326970   | TCMID |
|    |      |                |                                       | sulfur                                                 | NA    | NA   | NA         | 5460602   | TCMID |
|    |      |                |                                       | Te                                                     | NA    | NA   | NA         | 6474657   | TCMID |
| 34 | 夏天无  | Xiatianwu      | <i>Corydalis Decumbentis Rhizoma</i>  | Adlumidine                                             | 66.55 | 0.88 | 550-49-2   | 120734    | TCMSP |
|    |      |                |                                       | PDSP1 000624                                           | 33.45 | 0.69 | 298-45-3   | NA        | TCMSP |
|    |      |                |                                       | Protoporphyrin                                         | 30.86 | 0.56 | 553-12-8   | NA        | TCMSP |

|    |      |               |                                 |                                                                                |       |      |             |           |       |
|----|------|---------------|---------------------------------|--------------------------------------------------------------------------------|-------|------|-------------|-----------|-------|
|    |      |               |                                 | palmatine                                                                      | 64.6  | 0.65 | 3486-67-7   | 19009     | TCMSP |
|    |      |               |                                 | Fumarine                                                                       | 59.26 | 0.83 | 130-86-9    | NA        | TCMSP |
|    |      |               |                                 | Isocorypalmine                                                                 | 35.77 | 0.59 | 483-34-1    | 440229    | TCMSP |
|    |      |               |                                 | bicuculline                                                                    | 69.67 | 0.88 | 485-49-4    | 10237     | TCMSP |
|    |      |               |                                 | C09367                                                                         | 47.54 | 0.69 | 298-45-3    | NA        | TCMSP |
|    |      |               |                                 | decumbenine C                                                                  | NA    | NA   | 100163-16-4 | 127491    | CSDB  |
|    |      |               |                                 | tetrahydropalmatine                                                            | NA    | NA   | 10097-84-4  | 5417      | CSDB  |
|    |      |               |                                 | epi- $\alpha$ -decumbensine                                                    | 6.44  | 0.88 | 11014-02-1  | 189686    | CSDB  |
|    |      |               |                                 | protopine                                                                      | NA    | NA   | 130-86-9    | 4970      | CSDB  |
|    |      |               |                                 | $\beta$ -allocryptopine                                                        | NA    | NA   | 24240-04-8  | 98570     | CSDB  |
|    |      |               |                                 | corlumidine                                                                    | NA    | NA   | 25344-54-1  | 57580996  | CSDB  |
|    |      |               |                                 | palmatine                                                                      | 64.6  | 0.65 | 3486-67-7   | 19009     | CSDB  |
|    |      |               |                                 | jatrorrhizine                                                                  | 19.65 | 0.59 | 3621-38-3   | 72323     | CSDB  |
|    |      |               |                                 | decumbensine                                                                   | NA    | NA   | 6883-44-9   | 189685    | CSDB  |
|    |      |               |                                 | decumbenine                                                                    | NA    | NA   | 76733-83-0  | 131859089 | CSDB  |
|    |      |               |                                 | adlumidine                                                                     | 66.55 | 0.88 | 550-49-2    | 120734    | CSDB  |
|    |      |               |                                 | bicuculline                                                                    | 69.67 | 0.88 | 485-49-4    | 10237     | CSDB  |
|    |      |               |                                 | corydaline                                                                     | 65.84 | 0.68 | NA          | 101301    | CSDB  |
|    |      |               |                                 | bulbocapnine                                                                   | NA    | NA   | NA          | 12441     | CSDB  |
|    |      |               |                                 | $\alpha$ -allocrypropine                                                       | NA    | NA   | NA          | NA        | CSDB  |
|    |      |               |                                 | hydroxyhydrastine                                                              | NA    | NA   | NA          | NA        | CSDB  |
|    |      |               |                                 | (+)-corydaline                                                                 | NA    | NA   | NA          | 326549    | TCMID |
|    |      |               |                                 | (?)-tetrahydrocoptisine                                                        | NA    | NA   | NA          | 697545    | TCMID |
|    |      |               |                                 | 6,6'-difemloylisosiposin                                                       | NA    | NA   | NA          | 11801844  | TCMID |
|    |      |               |                                 | 6,6'-coumaroylisiposin                                                         | NA    | NA   | NA          | NA        | TCMID |
|    |      |               |                                 | 6,6'-p-hydroxybenzoylisiposin                                                  | NA    | NA   | NA          | 101616452 | TCMID |
|    |      |               |                                 | 6,6'-vanilloisiposinI                                                          | NA    | NA   | NA          | NA        | TCMID |
|    |      |               |                                 | 6-feruloyl-6,6'-vanillylisiposin                                               | NA    | NA   | NA          | NA        | TCMID |
|    |      |               |                                 | 6-o-e-feruloylajugol                                                           | NA    | NA   | NA          | 6325178   | TCMID |
|    |      |               |                                 | adlumidine                                                                     | 66.55 | 0.88 | 550-49-2    | 120734    | TCMID |
|    |      |               |                                 | adlumine                                                                       | NA    | NA   | NA          | 442155    | TCMID |
|    |      |               |                                 | atropine                                                                       | NA    | NA   | NA          | 24847973  | TCMID |
|    |      |               |                                 | b-sitosterol                                                                   | 36.91 | 0.75 | 83-46-5     | 222284    | TCMID |
|    |      |               |                                 | bicuculline                                                                    | NA    | NA   | NA          | 6710622   | TCMID |
|    |      |               |                                 | bulbocapnine                                                                   | NA    | NA   | NA          | 12441     | TCMID |
|    |      |               |                                 | coptisine                                                                      | NA    | NA   | NA          | 72322     | TCMID |
|    |      |               |                                 | ferulic acid                                                                   | 39.56 | 0.06 | 537-98-4    | 445858    | TCMID |
|    |      |               |                                 | kaempferol-3-O- $\beta$ -D-xylopyrano-syl-(1 $\rightarrow$ 2)-[ $\alpha$ -L-rh | NA    | NA   | NA          | NA        | TCMID |
|    |      |               |                                 | menisperine                                                                    | 26.17 | 0.59 | 17669-18-0  | 161487    | TCMID |
|    |      |               |                                 | menisporphine                                                                  | NA    | NA   | NA          | 150032    | TCMID |
|    |      |               |                                 | palmatine                                                                      | NA    | NA   | NA          | 200119    | TCMID |
|    |      |               |                                 | protopine                                                                      | NA    | NA   | NA          | 185559    | TCMID |
|    |      |               |                                 | protoporphyrin                                                                 | NA    | NA   | NA          | 53481561  | TCMID |
|    |      |               |                                 | tetrahydropalmitine                                                            | NA    | NA   | NA          | NA        | TCMID |
|    |      |               |                                 | tetrahydropalmatine                                                            | NA    | NA   | NA          | 6602555   | TCMID |
|    |      |               |                                 | tetrahydropiperic acid                                                         | 34.6  | 0.1  | NA          | 5321853   | TCMID |
|    |      |               |                                 | $\beta$ -allocryptopine                                                        | NA    | NA   | NA          | 98570     | TCMID |
| 35 | 荆芥穗炭 | Jingjiesuitan | Schizonepetae Spica Carbonisata | NA                                                                             | NA    | NA   | NA          | NA        |       |
| 36 | 天花粉  | Tianhuafen    | Trichosanthis Radix             | Spinasterol                                                                    | 42.98 | 0.76 | 481-18-5    | 5281331   | TCMSP |
|    |      |               |                                 | Schottenol                                                                     | 37.42 | 0.75 | 521-03-9    | 441837    | TCMSP |
|    |      |               |                                 | 23,24-dihydrocucurbitacin B                                                    | 23.15 | 0.75 | NA          | 267250    | CSDB  |
|    |      |               |                                 | aspartate                                                                      | NA    | NA   | 6899-03-2   | 5960      | CSDB  |
|    |      |               |                                 | xylose                                                                         | 51.08 | 0.02 | 58-86-6     | 644160    | CSDB  |
|    |      |               |                                 | glycine                                                                        | NA    | NA   | 56-40-6     | 750       | CSDB  |
|    |      |               |                                 | D-mannose                                                                      | 1.76  | 0.03 | 3458-28-4   | 161658    | CSDB  |
|    |      |               |                                 | citrulline                                                                     | NA    | NA   | NA          | 9750      | CSDB  |
|    |      |               |                                 | ornithine                                                                      | NA    | NA   | 70-26-8     | 6262      | CSDB  |
|    |      |               |                                 | galactose                                                                      | NA    | NA   | 59-23-4     | 6036      | CSDB  |
|    |      |               |                                 | serine                                                                         | NA    | NA   | 6898-95-9   | 617       | CSDB  |
|    |      |               |                                 | threonine                                                                      | NA    | NA   | 72-19-5     | 6288      | CSDB  |
|    |      |               |                                 | stigmast-7-en-3 $\beta$ -ol                                                    | 37.42 | 0.75 | 521-03-9    | 441837    | CSDB  |
|    |      |               |                                 | glutamic acid                                                                  | NA    | NA   | 6899-05-4   | 611       | CSDB  |
|    |      |               |                                 | arabinose                                                                      | NA    | NA   | 147-81-9    | 854       | CSDB  |
|    |      |               |                                 | phenylalanine                                                                  | NA    | NA   | 63-91-2     | 6140      | CSDB  |
|    |      |               |                                 | fructose                                                                       | 1.68  | 0.03 | 57-48-7     | 5984      | CSDB  |
|    |      |               |                                 | bryonolic acid                                                                 | NA    | NA   | 24480-45-3  | 159970    | CSDB  |
|    |      |               |                                 | histidine                                                                      | NA    | NA   | 71-00-1     | 6274      | CSDB  |
|    |      |               |                                 | ribose                                                                         | NA    | NA   | NA          | 10975657  | CSDB  |
|    |      |               |                                 | $\alpha$ -hydroxymethyl serine                                                 | NA    | NA   | 17149-11-0  | 439893    | CSDB  |
|    |      |               |                                 | cucurbitacin B                                                                 | 25.9  | 0.75 | 6199-67-3   | 5281316   | CSDB  |
|    |      |               |                                 | cucurbitacin D                                                                 | 16.85 | 0.79 | 3877-86-9   | 5281318   | CSDB  |
|    |      |               |                                 | D-glucose                                                                      | NA    | NA   | NA          | 5793      | CSDB  |
|    |      |               |                                 | lysine                                                                         | 29.33 | 0.02 | 56-87-1     | 5962      | CSDB  |
|    |      |               |                                 | tyrosine                                                                       | NA    | NA   | 60-18-4     | 6057      | CSDB  |
|    |      |               |                                 | arginine                                                                       | NA    | NA   | 74-79-3     | 6322      | CSDB  |
|    |      |               |                                 | valine                                                                         | NA    | NA   | 72-18-4     | 6287      | CSDB  |
|    |      |               |                                 | trichosanthin                                                                  | NA    | NA   | NA          | NA        | CSDB  |
|    |      |               |                                 | stigmasta-7-en-3 $\beta$ -ol-3-O- $\beta$ -D-glucopyranoside                   | NA    | NA   | NA          | NA        | CSDB  |
|    |      |               |                                 | trichosa A                                                                     | NA    | NA   | NA          | NA        | CSDB  |
|    |      |               |                                 | trichosa B                                                                     | NA    | NA   | NA          | NA        | CSDB  |
|    |      |               |                                 | trichosa C                                                                     | NA    | NA   | NA          | NA        | CSDB  |
|    |      |               |                                 | trichosa D                                                                     | NA    | NA   | NA          | NA        | CSDB  |
|    |      |               |                                 | trichosa E                                                                     | NA    | NA   | NA          | NA        | CSDB  |
|    |      |               |                                 | (e,z,e)-7-hydroxymethyl-3,11,15-trimethyl-2,6,10,14-                           | NA    | NA   | NA          | 5282197   | TCMID |
|    |      |               |                                 | 1,5-dimethylnaphthalene                                                        | NA    | NA   | NA          | 11306     | TCMID |
|    |      |               |                                 | 1-(2-furanyl)ethanone                                                          | 49.63 | 0.01 | 80145-44-4  | 14505     | TCMID |
|    |      |               |                                 | 1-hexanol                                                                      | 22.04 | 0.01 | 25917-35-5  | 8103      | TCMID |
|    |      |               |                                 | 1-nonanol                                                                      | 33.19 | 0.01 | 28473-21-4  | 8914      | TCMID |
|    |      |               |                                 | 1-octen-3-ol                                                                   | 32.79 | 0.01 | 3391-86-4   | 6992244   | TCMID |
|    |      |               |                                 | 2,3-butanediol                                                                 | 34.87 | 0.01 | 513-85-9    | 225936    | TCMID |
|    |      |               |                                 | 2,4-dimethylphenol                                                             | NA    | NA   | NA          | 7771      | TCMID |
|    |      |               |                                 | 2-furancarboxaldehyde                                                          | 34.35 | 0.01 | 98-01-1     | 7362      | TCMID |
|    |      |               |                                 | 2-methylnaphthalene                                                            | NA    | NA   | NA          | 450699    | TCMID |
|    |      |               |                                 | 2-pentadecanone                                                                | 7.41  | 0.06 | 2345-28-0   | 61303     | TCMID |
|    |      |               |                                 | 20-hexadecanoylgenol                                                           | NA    | NA   | NA          | 5318035   | TCMID |
|    |      |               |                                 | 3-methyl-1-butanol                                                             | 65.67 | 0    | 123-51-3    | 31260     | TCMID |
|    |      |               |                                 | 3-methylphenanthrene                                                           | 17.11 | 0.11 | 832-71-3    | 13258     | TCMID |
|    |      |               |                                 | 4-hydroxy-4-methyl-2-pentanone                                                 | 58.34 | 0.01 | 123-42-2    | 31256     | TCMID |
|    |      |               |                                 | 4-methylbenzofuran                                                             | NA    | NA   | NA          | 53426730  | TCMID |
|    |      |               |                                 | 7-stigmastanol-3-o- $\beta$ -d-glucoside                                       | 20.67 | 0.62 | 61376-86-1  | 124879    | TCMID |
|    |      |               |                                 | 9-(z)-octadecen-1-ol                                                           | 27.27 | 0.11 | 8014-60-6   | 5284499   | TCMID |
|    |      |               |                                 | acenaphthylene                                                                 | 28.55 | 0.07 | 208-96-8    | 9161      | TCMID |
|    |      |               |                                 | acetoin                                                                        | 40.84 | 0.01 | 513-86-0    | 447765    | TCMID |
|    |      |               |                                 | anthracene                                                                     | 17.74 | 0.1  | 120-12-7    | 8418      | TCMID |
|    |      |               |                                 | benzaldehyde                                                                   | NA    | NA   | NA          | 20375919  | TCMID |
|    |      |               |                                 | benzeneethanol                                                                 | NA    | NA   | NA          | 11672668  | TCMID |
|    |      |               |                                 | benzenemethanol                                                                | 58.68 | 0.01 | 1336-27-2   | 244       | TCMID |
|    |      |               |                                 | bryonolic acid                                                                 | NA    | NA   | NA          | 52940232  | TCMID |
|    |      |               |                                 | bryonolic acid                                                                 | NA    | NA   | NA          | 73242192  | TCMID |
|    |      |               |                                 | cedrenol                                                                       | NA    | NA   | NA          | 119831    | TCMID |
|    |      |               |                                 | cis-9,cis-12-linoleic acid                                                     | NA    | NA   | NA          | NA        | TCMID |
|    |      |               |                                 | citrulline                                                                     | NA    | NA   | NA          | 637599    | TCMID |
|    |      |               |                                 | citrusin b                                                                     | NA    | NA   | NA          | 11972318  | TCMID |
|    |      |               |                                 | delta7-stigmastene-3                                                           | NA    | NA   | NA          | 3082125   | TCMID |
|    |      |               |                                 | dibenzofuran                                                                   | NA    | NA   | NA          | 22185316  | TCMID |
|    |      |               |                                 | dibutyl phthalate                                                              | NA    | NA   | NA          | 171810    | TCMID |
|    |      |               |                                 | docosane                                                                       | 8.37  | 0.18 | 629-97-0    | 12405     | TCMID |

|    |     |             |                             |                                             |       |      |            |           |       |
|----|-----|-------------|-----------------------------|---------------------------------------------|-------|------|------------|-----------|-------|
|    |     |             |                             | ethyl hexadecanoate                         | 18.99 | 0.14 | 628-97-7   | 12366     | TCMID |
|    |     |             |                             | ethyl linoleate                             | NA    | NA   | NA         | 5365672   | TCMID |
|    |     |             |                             | ethyl linolenate                            | 46.1  | 0.2  | 1191-41-9  | 6371716   | TCMID |
|    |     |             |                             | ethyl n-pentadecanoate                      | NA    | NA   | NA         | 23518     | TCMID |
|    |     |             |                             | ethyl pentadecanoate                        | 19.74 | 0.11 | 41114-00-5 | 38762     | TCMID |
|    |     |             |                             | ethyl stearate                              | 17.7  | 0.19 | 111-61-5   | 8122      | TCMID |
|    |     |             |                             | gamma-aminobutyric acid                     | NA    | NA   | NA         | 210329    | TCMID |
|    |     |             |                             | geranylacetone                              | 45.53 | 0.04 | 3879-26-3  | 1713001   | TCMID |
|    |     |             |                             | heptadecane                                 | 8.64  | 0.07 | 629-78-7   | 12398     | TCMID |
|    |     |             |                             | hexadecane                                  | NA    | NA   | NA         | 172416    | TCMID |
|    |     |             |                             | hexadecanoic acid                           | NA    | NA   | NA         | 520159    | TCMID |
|    |     |             |                             | hexahydrofarnesylacetone                    | NA    | NA   | NA         | 10408     | TCMID |
|    |     |             |                             | linolenic acid                              | 45.01 | 0.15 | 60-33-3    | 5280934   | TCMID |
|    |     |             |                             | methyl hexadecanoate                        | NA    | NA   | NA         | 10107098  | TCMID |
|    |     |             |                             | methyl linoleate                            | NA    | NA   | NA         | 5319705   | TCMID |
|    |     |             |                             | methyl linolenate                           | 46.15 | 0.17 | 7361-80-0  | 5367462   | TCMID |
|    |     |             |                             | methyl n-pentadecanoate                     | 18.82 | 0.1  | 7132-64-1  | 23518     | TCMID |
|    |     |             |                             | methyl pentadecanoate                       | NA    | NA   | NA         | 91424     | TCMID |
|    |     |             |                             | methyl stearate                             | 16.8  | 0.16 | 112-61-8   | 8201      | TCMID |
|    |     |             |                             | methyl tetradecanoate                       | NA    | NA   | NA         | 11779960  | TCMID |
|    |     |             |                             | n-octadecane                                | 9.81  | 0.09 | 593-45-3   | 11635     | TCMID |
|    |     |             |                             | naphthalene                                 | NA    | NA   | NA         | 177751    | TCMID |
|    |     |             |                             | nonadecane                                  | 8.52  | 0.11 | 629-92-5   | 12401     | TCMID |
|    |     |             |                             | nonanal                                     | 40.28 | 0.02 | 124-19-6   | 31289     | TCMID |
|    |     |             |                             | phenanthrene                                | NA    | NA   | NA         | 11346449  | TCMID |
|    |     |             |                             | phytol                                      | NA    | NA   | NA         | 11301173  | TCMID |
|    |     |             |                             | pyrene                                      | NA    | NA   | NA         | 6912026   | TCMID |
|    |     |             |                             | spinoside                                   | NA    | NA   | NA         | 6326071   | TCMID |
|    |     |             |                             | trans-2-nonenal                             | 19.18 | 0.02 | 18829-56-6 | 5283335   | TCMID |
|    |     |             |                             | trichosanthin                               | NA    | NA   | NA         | NA        | TCMID |
|    |     |             |                             | $\alpha$ -hydroxymethylserine               | NA    | NA   | NA         | NA        | TCMID |
|    |     |             |                             | $\alpha$ -spinasterol- $\beta$ -d-glucoside | NA    | NA   | NA         | 101932119 | TCMID |
|    |     |             |                             | $\gamma$ -aminobutyric acid                 | NA    | NA   | NA         | 119       | TCMID |
| 37 | 川射干 | Chuanshegan | <i>Iris Tectori Rhizoma</i> | asperglauclide                              | 58.02 | 0.52 | 56121-42-7 | 13855373  | TCMSP |
|    |     |             |                             | Rhamnazin                                   | 47.14 | 0.34 | 552-54-5   | 5320945   | TCMSP |
|    |     |             |                             | beta-sitosterol                             | 36.91 | 0.75 | 83-46-5    | 222284    | TCMSP |
|    |     |             |                             | Iristectorigenin (9C1)                      | 71.55 | 0.34 | 37744-62-0 | 5488781   | TCMSP |
|    |     |             |                             | Iristectorigenin A                          | 63.36 | 0.34 | 39012-01-6 | 5491637   | TCMSP |
|    |     |             |                             | irisolidone                                 | 37.78 | 0.3  | 2345-17-7  | 5281781   | TCMSP |
