# Supplementary material
Source: PubMed Central journal article supplement (PMC7803147)
Supplement: mmc8.pdf [file mmc8.pdf]

| <b>Tab. S7 Binding affinities of compounds to proteins computed with the MM-GBSA method (<math>\Delta G</math>: kcal/mol).</b> |                           |                           |                           |                              |                               |
|--------------------------------------------------------------------------------------------------------------------------------|---------------------------|---------------------------|---------------------------|------------------------------|-------------------------------|
| Systems                                                                                                                        | $\Delta E_{\text{ele}}^a$ | $\Delta E_{\text{vdw}}^b$ | $\Delta G_{\text{pol}}^c$ | $\Delta G_{\text{nonpol}}^d$ | $\Delta G_{\text{MM/GBSA}}^e$ |
| STAT3-quercetagenin                                                                                                            | -44.26±16.97              | -15.75±6.48               | 51.03±12.63               | -3.15±0.50                   | -12.14±3.24                   |
| TNF- $\alpha$ -4-(3-Phenylacryloyloxymethyl)-6,7-dimethoxycoumarin                                                             | -10.34±2.79               | -53.84±2.40               | 29.04±2.29                | -6.92±0.24                   | -42.06±3.83                   |

<sup>a</sup>  $\Delta E_{\text{ele}}$  stood for the electrostatic energy contribution

<sup>b</sup>  $\Delta E_{\text{vdw}}$  represented van der Waals interactions contribution

<sup>c</sup>  $\Delta G_{\text{pol}}$  was the polar solvent interaction energy calculated by GB model

<sup>d</sup>  $\Delta G_{\text{nonpol}}$  was nonpolar solvation free energy, which was evaluated using LCPO method

<sup>e</sup>  $\Delta G_{\text{MM/GBSA}}$  represented binding free energy,  $\Delta G_{\text{MM/GBSA}} = \Delta E_{\text{vdw}} + \Delta E_{\text{ele}} + \Delta G_{\text{pol}} + \Delta G_{\text{nonpol}}$
